# Supplementary material for: A Comprehensive Analysis of the Dynamic Biological Networks in HCV Induced Hepatocarcinogenesis
Source: PLoS One. 2011 Apr 19;6(4):e18516. doi: 10.1371/journal.pone.0018516 (PMC3079719; doi:10.1371/journal.pone.0018516)
Supplement: Data S1 — Disease-related biological networks in each stage of HCV induced hepatocarcinogenesis. (XLS) [file pone.0018516.s001.xls]

## Sheet: Hepatitis C 
Protein1	Protein2	Iteraction type	Frequence		#PPI is protein-protein interaction,TRI is transcriptional regulatory interaction.
JAK2	STAT3	PPI	0.571428571428571		#When interaction is TRI, Protein1 is transcription factor, Protein2 is target gene.
SYK	ITGB2	PPI	0.523809523809524
TNFSF13B	TNFRSF17	PPI	0.571428571428571
IL23A	IL23A	PPI	0.857142857142857
DBP	TEF	PPI	0.666666666666667
MARCH2	UBE2H	PPI	0.571428571428571
IL6R	IL6R	PPI	0.904761904761905
NEDD9	SMAD1	PPI	0.714285714285714
NDC80	NDC80	PPI	0.857142857142857
SERPINE1	IGFBP5	PPI	0.952380952380952
CDK5	ERBB3	PPI	0.666666666666667
CDK5	TP53	PPI	0.571428571428571
YWHAB	TJP2	PPI	0.80952380952381
AKAP11	PRKAR1A	PPI	0.523809523809524
DLGAP4	DLG1	PPI	0.80952380952381
EID2	SMAD4	PPI	0.523809523809524
AMBP	AMBP	PPI	0.619047619047619
DGKZ	LEPR	PPI	0.523809523809524
CD40	MAP3K8	PPI	0.619047619047619
AXL	PIK3R1	PPI	0.523809523809524
HERC5	CCNA2	PPI	0.523809523809524
ANK3	PIK3R1	PPI	0.714285714285714
BHLHB2	BHLHB2	PPI	1
MET	STAT3	PPI	0.904761904761905
CSNK1A1	TP53	PPI	0.619047619047619
CRP	CRP	PPI	0.904761904761905
FYN	MS4A1	PPI	0.857142857142857
DPP4	CXCL10	PPI	0.666666666666667
RUNX2	JUN	PPI	0.571428571428571
SMAD5	SFPQ	PPI	0.523809523809524
HIPK2	SMAD1	PPI	0.80952380952381
GTF2I	YY1	PPI	0.571428571428571
PPARBP	PPARBP	PPI	0.714285714285714
CD74	CD74	PPI	0.571428571428571
LDLR	APOB	PPI	0.857142857142857
BRD7	RIF1	PPI	0.714285714285714
FEZ1	IMMT	PPI	0.571428571428571
SEC61A1	SEC61A1	PPI	0.571428571428571
SPOP	H2AFY	PPI	0.761904761904762
GSN	FN1	PPI	0.523809523809524
HSP90AB1	HSP90AB1	PPI	0.523809523809524
ATF3	ATF3	PPI	1
SOCS3	IL6ST	PPI	0.952380952380952
TACSTD1	TACSTD1	PPI	0.666666666666667
UBE2I	PHC1	PPI	0.523809523809524
NR2F2	HIPK3	PPI	0.523809523809524
BMP8B	BMP8B	PPI	0.571428571428571
IL6ST	STAT3	PPI	1
CCNB1	PBK	PPI	0.571428571428571
PGF	PGF	PPI	0.904761904761905
GRB10	EGFR	PPI	0.619047619047619
PNN	CTBP1	PPI	0.571428571428571
GRK5	GRK5	PPI	0.666666666666667
IFRD1	RIT1	PPI	0.523809523809524
CXCL13	CCL21	PPI	0.523809523809524
CNOT4	UBE2B	PPI	0.714285714285714
ERBB3	EGFR	PPI	0.666666666666667
TLR1	DHX36	PPI	0.666666666666667
PIK3R1	SYK	PPI	0.523809523809524
GTF2I	MYC	PPI	0.571428571428571
SOCS3	JAK2	PPI	0.571428571428571
HIPK2	TP53	PPI	0.571428571428571
GART	GART	PPI	1
BTK	BTK	PPI	0.571428571428571
TICAM2	TLR3	PPI	0.523809523809524
PRKCZ	PRKCZ	PPI	0.761904761904762
HSP90B1	APOB	PPI	0.619047619047619
PURA	CDK5	PPI	0.857142857142857
JAK2	EPOR	PPI	0.571428571428571
MYC	CEBPA	PPI	0.523809523809524
NUP62	RANBP2	PPI	0.523809523809524
IGFBP7	CCL5	PPI	0.666666666666667
WASF2	WASF2	PPI	0.904761904761905
LAMA4	BRD7	PPI	0.523809523809524
CDC2	PTPN1	PPI	0.523809523809524
DLG1	VIL2	PPI	0.523809523809524
TCEA2	KIAA1128	PPI	0.904761904761905
PIK3R1	EPOR	PPI	0.80952380952381
RAC1	CAV1	PPI	0.619047619047619
WASF2	FYN	PPI	0.80952380952381
FGA	FGA	PPI	0.666666666666667
TACC1	TACC1	PPI	0.761904761904762
STK4	STK4	PPI	0.666666666666667
F5	F5	PPI	0.619047619047619
EGFR	CAV1	PPI	0.571428571428571
SOX4	UBE2I	PPI	0.523809523809524
FYB	SH2D1A	PPI	0.523809523809524
PBK	DLG1	PPI	0.714285714285714
KPNB1	TP53	PPI	0.523809523809524
SAP30L	FEZ1	PPI	0.666666666666667
CFD	CFD	PPI	0.904761904761905
SLAMF7	SLAMF7	PPI	0.857142857142857
ZBTB16	HDAC4	PPI	0.714285714285714
SYK	LCK	PPI	0.714285714285714
S100P	S100P	PPI	0.619047619047619
ANKRD11	NCOA2	PPI	0.904761904761905
MKNK2	MKNK2	PPI	0.523809523809524
SH2D1A	ARHGEF7	PPI	0.714285714285714
LDLR	APOE	PPI	0.619047619047619
FOSL2	JUND	PPI	0.619047619047619
CEBPD	CEBPA	PPI	0.523809523809524
ZHX1	TP53	PPI	0.571428571428571
LRPPRC	LRPPRC	PPI	0.857142857142857
PRSS8	ATF7IP	PPI	0.523809523809524
GTF2I	GTF2I	PPI	0.571428571428571
CDC2	PBK	PPI	0.761904761904762
PTPN11	EGFR	PPI	0.523809523809524
TP53	NR4A1	PPI	0.619047619047619
KPNB1	KPNB1	PPI	0.904761904761905
SRGN	ALB	PPI	0.952380952380952
CASP2	CFLAR	PPI	0.619047619047619
CAV1	APP	PPI	0.571428571428571
JAG1	THBS1	PPI	0.714285714285714
PGF	VEGFA	PPI	0.80952380952381
PRKAR1A	HLA-A	PPI	0.619047619047619
MYCBP	CPNE2	PPI	0.666666666666667
RIT1	MLLT4	PPI	0.571428571428571
STK4	MBP	PPI	0.523809523809524
DHX9	MGEA5	PPI	0.666666666666667
PPID	HSP90AB1	PPI	0.523809523809524
YWHAB	MLLT4	PPI	0.761904761904762
CD48	FYN	PPI	0.666666666666667
IL7R	FYN	PPI	0.857142857142857
TP53	TP53	PPI	0.619047619047619
EED	EED	PPI	0.619047619047619
EXOSC4	EXOSC4	PPI	0.571428571428571
CHI3L1	CHI3L1	PPI	0.714285714285714
FOSL2	JUN	PPI	0.666666666666667
PSMB8	TAP2	PPI	0.571428571428571
SPP1	IGFBP5	PPI	0.571428571428571
FOS	JUNB	PPI	1
JUND	FOS	PPI	0.857142857142857
FOXP1	CTBP1	PPI	0.571428571428571
SYK	POU2AF1	PPI	0.571428571428571
COIL	COIL	PPI	0.857142857142857
SFRS4	PNN	PPI	0.571428571428571
SOCS2	EPOR	PPI	0.619047619047619
PRKCB1	ITGB2	PPI	0.619047619047619
FEZ1	RIF1	PPI	0.523809523809524
GARNL1	TCF3	PPI	0.523809523809524
KPNB1	RUNX1T1	PPI	0.666666666666667
SOX5	SOX5	PPI	0.619047619047619
NR5A2	NRIP1	PPI	0.714285714285714
PTPRK	CTNNB1	PPI	0.571428571428571
FYN	CTNNB1	PPI	0.523809523809524
CEPT1	CEPT1	PPI	0.523809523809524
TF	CANX	PPI	0.666666666666667
HLA-F	HLA-F	PPI	0.619047619047619
NCOA2	NR4A1	PPI	1
SH2D1A	FYN	PPI	0.761904761904762
ITGB3BP	ITGB5	PPI	0.666666666666667
ZBTB16	CDC2	PPI	0.619047619047619
FOS	STAT1	PPI	0.952380952380952
SMAD1	LEF1	PPI	0.619047619047619
EGFR	STAT1	PPI	0.80952380952381
UBE2I	STAT1	PPI	0.761904761904762
TNFSF13B	TNFSF13B	PPI	0.714285714285714
EXOSC3	EXOSC4	PPI	0.523809523809524
FEZ1	RAB3GAP2	PPI	0.761904761904762
STAT1	IFNGR1	PPI	0.952380952380952
PLAUR	FYN	PPI	0.619047619047619
GNG11	ZHX1	PPI	0.666666666666667
STAT1	SYK	PPI	0.666666666666667
ARID2	SMARCA4	PPI	0.619047619047619
CDK5	APP	PPI	0.619047619047619
MTMR9	SPG21	PPI	0.571428571428571
NOL3	NOL3	PPI	0.761904761904762
THBS1	IGFBP5	PPI	0.952380952380952
DLG1	LCK	PPI	0.857142857142857
COIL	SART3	PPI	0.619047619047619
FOSB	JUND	PPI	0.857142857142857
GSPT1	GSPT1	PPI	1
LGALS3BP	LGALS3BP	PPI	0.80952380952381
PTPRC	PTPRC	PPI	0.619047619047619
LCK	CD247	PPI	0.904761904761905
SMAD1	SOX5	PPI	0.619047619047619
TFRC	TF	PPI	0.666666666666667
SYK	EPOR	PPI	0.714285714285714
SMAD1	SMAD4	PPI	0.571428571428571
JUN	HNRPM	PPI	0.619047619047619
SPHK2	FYN	PPI	0.523809523809524
APH1A	PSEN2	PPI	0.857142857142857
PTPRC	ITGAL	PPI	0.571428571428571
ADRA1A	RGS2	PPI	0.761904761904762
GADD45G	PTPRK	PPI	0.952380952380952
CASP1	EGFR	PPI	0.666666666666667
TRAF3IP3	TRAF3	PPI	0.80952380952381
KPNB1	FGFR1	PPI	0.571428571428571
AKAP10	PRKAR1A	PPI	0.952380952380952
ERBB3	NRG1	PPI	0.761904761904762
MED18	TRFP	PPI	0.857142857142857
LCK	CD48	PPI	0.666666666666667
KIF13A	ATF7IP	PPI	0.619047619047619
GADD45G	GADD45B	PPI	0.952380952380952
SF1	DDX17	PPI	0.571428571428571
ITGB5	CYR61	PPI	0.80952380952381
SH3KBP1	CD2	PPI	0.80952380952381
GSTA4	GSTA4	PPI	0.666666666666667
APLP2	HLA-A	PPI	0.523809523809524
AQP1	AQP1	PPI	0.523809523809524
SIP1	SIP1	PPI	0.523809523809524
TCF12	TCF3	PPI	0.523809523809524
YWHAB	SRRM2	PPI	0.523809523809524
GRK5	AVPR1A	PPI	0.571428571428571
SLAMF7	SH2D1A	PPI	0.666666666666667
CDC2	DUT	PPI	0.571428571428571
IL1B	IL1B	PPI	0.571428571428571
IER3	PPP2R5C	PPI	0.619047619047619
GBP5	GBP5	PPI	0.523809523809524
JAG1	MLLT4	PPI	0.619047619047619
ZNF397	ZNF397	PPI	0.523809523809524
CCNB1	CDC2	PPI	0.571428571428571
PRKCD	PRKCD	PPI	0.571428571428571
CDC2	RUNX2	PPI	0.523809523809524
KPNA6	STAT1	PPI	0.857142857142857
PTEN	CAV1	PPI	0.666666666666667
SPTBN1	ATF7IP	PPI	0.666666666666667
PLG	APOH	PPI	0.571428571428571
PRKCB1	BTK	PPI	0.571428571428571
SMAD5	SMAD1	PPI	0.523809523809524
HRAS	MLLT4	PPI	0.523809523809524
LEPR	LEPR	PPI	1
TF	IGFBP5	PPI	0.714285714285714
TCF3	TCF3	PPI	0.523809523809524
PRKCZ	YWHAB	PPI	0.761904761904762
IL6R	STAT3	PPI	0.904761904761905
MTUS1	MTUS1	PPI	1
CDC2	APLP2	PPI	0.714285714285714
FN1	CRP	PPI	0.904761904761905
IFIT2	IFIT3	PPI	0.952380952380952
FOSL2	JUNB	PPI	0.666666666666667
JAK2	CCR2	PPI	0.571428571428571
CTBP1	CTBP1	PPI	0.571428571428571
THBS1	COL1A1	PPI	0.571428571428571
CDC2	RRM2	PPI	0.857142857142857
SYNJ2BP	RALBP1	PPI	0.761904761904762
KCNJ10	DLG1	PPI	0.714285714285714
PYCARD	CASP1	PPI	0.523809523809524
RUNX1T1	RUNX1T1	PPI	0.666666666666667
RAC1	STAT1	PPI	0.619047619047619
UBE2I	PTEN	PPI	0.80952380952381
RAB11FIP4	RAB11FIP4	PPI	0.904761904761905
IL7R	PIK3R1	PPI	0.714285714285714
PTGS2	TP53	PPI	0.619047619047619
HGF	HGF	PPI	0.857142857142857
DHX9	JUN	PPI	0.666666666666667
GLS2	DLG1	PPI	0.857142857142857
PCBP2	QKI	PPI	0.619047619047619
TTC3	ATF7IP	PPI	0.857142857142857
FYN	STAT1	PPI	0.857142857142857
RASGRP1	DGKZ	PPI	0.523809523809524
MCL1	MCL1	PPI	1
PTPRK	TK1	PPI	0.571428571428571
NF1	APP	PPI	0.571428571428571
HSPD1	HSPD1	PPI	0.761904761904762
YWHAB	ZFP36	PPI	0.952380952380952
LCK	FAS	PPI	0.714285714285714
PRKCZ	WWC1	PPI	0.761904761904762
TP53	CDC2	PPI	0.523809523809524
HBD	HBD	PPI	0.666666666666667
GADD45B	CDC2	PPI	0.857142857142857
CALCOCO2	ZNF638	PPI	0.761904761904762
RORA	RORA	PPI	0.714285714285714
PTEN	SLC9A3R2	PPI	0.523809523809524
PLG	F2RL1	PPI	0.523809523809524
TRIP12	ATF7IP	PPI	0.666666666666667
THRB	NRIP1	PPI	0.714285714285714
TGM2	TGM2	PPI	0.571428571428571
NR4A2	CDKN1C	PPI	1
LEPR	STAT3	PPI	1
SEMA4D	SEMA4D	PPI	0.523809523809524
GTF2I	STAT3	PPI	0.571428571428571
DHX9	DHX9	PPI	0.666666666666667
ENAH	ENAH	PPI	0.952380952380952
SLC1A2	SLC1A2	PPI	0.80952380952381
JAK2	IFNGR1	PPI	0.571428571428571
CDK5	SYN1	PPI	0.619047619047619
PCSK6	PCSK6	PPI	1
CGA	CGA	PPI	0.952380952380952
EGFR	SH3BGRL3	PPI	0.571428571428571
PTPN11	PIK3R1	PPI	0.523809523809524
HIST2H2BE	TBL1X	PPI	0.857142857142857
HTR4	HTR4	PPI	0.571428571428571
SERPINB9	ZHX1	PPI	0.952380952380952
RAB34	SMAD1	PPI	0.523809523809524
F11R	F11R	PPI	0.666666666666667
NFAT5	NFAT5	PPI	0.952380952380952
F2RL2	F11R	PPI	0.571428571428571
ARG1	ARG2	PPI	0.571428571428571
LHX2	RNF12	PPI	0.761904761904762
ENAH	FYB	PPI	0.619047619047619
NCOA2	THRB	PPI	1
LCK	LCK	PPI	0.952380952380952
SYN1	SYN1	PPI	0.666666666666667
YWHAB	RACGAP1	PPI	0.80952380952381
BACE2	APP	PPI	0.523809523809524
HDAC4	RUNX2	PPI	0.571428571428571
FAM125A	SH3KBP1	PPI	0.714285714285714
DLG1	MYO6	PPI	0.80952380952381
ZBTB16	SPOP	PPI	0.523809523809524
IL7R	IL7	PPI	0.80952380952381
BAG5	BAG5	PPI	0.523809523809524
DLGAP4	SORBS2	PPI	0.80952380952381
EGFR	ATP1B1	PPI	0.523809523809524
SOD2	SOD2	PPI	1
BHMT	BHMT	PPI	0.523809523809524
NCOA2	RORA	PPI	0.714285714285714
PLG	CXCL2	PPI	0.666666666666667
PRKCD	STAT1	PPI	0.571428571428571
PTPRC	FYN	PPI	0.571428571428571
PSMB8	PSMB8	PPI	0.666666666666667
MAPKAPK5	JUN	PPI	0.523809523809524
PTPN11	EPOR	PPI	0.523809523809524
VEGFA	VEGFA	PPI	0.857142857142857
APOE	ALB	PPI	0.619047619047619
KPNA6	KPNB1	PPI	0.857142857142857
PTPRC	LCK	PPI	0.619047619047619
ATF7IP	SMAD4	PPI	0.571428571428571
SERPINB9	C14orf1	PPI	0.666666666666667
PDCD6	SH3KBP1	PPI	0.619047619047619
KLF12	CTBP1	PPI	0.523809523809524
GADD45G	CDC2	PPI	0.80952380952381
APOH	LPA	PPI	0.523809523809524
PSMB4	SMAD1	PPI	0.571428571428571
FYN	CDC2	PPI	0.80952380952381
SORBS2	SEMA6A	PPI	0.904761904761905
NEDD9	NEDD9	PPI	0.761904761904762
GOLGA2	RAB2A	PPI	0.523809523809524
SFRS4	SFRS2IP	PPI	1
IL6ST	IL6ST	PPI	1
IFITM1	IFITM1	PPI	0.523809523809524
RPLP2	RPLP2	PPI	0.571428571428571
IFNGR1	IFNGR1	PPI	1
FEZ2	FEZ1	PPI	0.571428571428571
GMPR	GMPR	PPI	0.80952380952381
LCK	PIK3R1	PPI	0.761904761904762
NCOA2	CTNNB1	PPI	0.619047619047619
CASP2	CASP2	PPI	0.714285714285714
MET	MET	PPI	0.904761904761905
CD74	HLA-DQB1	PPI	0.571428571428571
EIF2C1	DICER1	PPI	0.761904761904762
MS4A1	CD40	PPI	0.666666666666667
NRIP1	JUN	PPI	0.714285714285714
WASF2	ACTR2	PPI	0.571428571428571
POLR1B	POLR1B	PPI	1
GBP1	GBP1	PPI	1
KPNA6	STAT3	PPI	0.904761904761905
F11	F11	PPI	0.571428571428571
NUP62	KPNB1	PPI	0.761904761904762
CALCOCO2	KIAA1267	PPI	0.714285714285714
GSTT2	GSTT2	PPI	0.904761904761905
CFHR4	CFHR4	PPI	0.904761904761905
UBD	NUB1	PPI	0.523809523809524
MAP3K13	MAP3K13	PPI	0.523809523809524
CCL19	CCL19	PPI	0.904761904761905
ING2	SMAD1	PPI	0.952380952380952
MACF1	ATF7IP	PPI	0.714285714285714
NMNAT1	NMNAT1	PPI	0.857142857142857
ARID2	SMARCE1	PPI	0.571428571428571
CCL5	CCL5	PPI	1
MET	HGF	PPI	0.761904761904762
JAK2	JAK2	PPI	0.571428571428571
PRKCH	FYN	PPI	0.714285714285714
STAT1	JUN	PPI	0.952380952380952
EGFR	PLD1	PPI	0.571428571428571
FGF21	KLB	PPI	0.571428571428571
CTNNB1	MAGI1	PPI	0.619047619047619
THBS1	FGA	PPI	0.666666666666667
MTMR9	MTMR9	PPI	0.619047619047619
RPS6KC1	RPS6KC1	PPI	0.523809523809524
CBX1	CBX1	PPI	0.952380952380952
APP	PSEN2	PPI	0.666666666666667
DFFB	DFFB	PPI	0.523809523809524
ETS2	ETS2	PPI	1
PRKCD	IL6ST	PPI	0.571428571428571
APOE	APOE	PPI	0.619047619047619
CTNNA1	DLG1	PPI	0.619047619047619
PNN	PNN	PPI	0.571428571428571
TP53INP1	HIPK2	PPI	0.666666666666667
IL8	IL8	PPI	1
MAFF	MAFF	PPI	0.80952380952381
NHEJ1	NHEJ1	PPI	0.619047619047619
CD86	CD86	PPI	0.714285714285714
NFIL3	NFIL3	PPI	0.80952380952381
CTBP1	NRIP1	PPI	0.571428571428571
FOS	FOS	PPI	1
PPARBP	NR4A1	PPI	0.714285714285714
TRAF3	TNFRSF17	PPI	0.761904761904762
PDLIM5	PRKCB1	PPI	1
LTB	LTB	PPI	0.619047619047619
CPNE2	PDCD6	PPI	0.523809523809524
SGK	NEDD4L	PPI	0.80952380952381
FOXP1	FOXP2	PPI	0.619047619047619
IL6ST	PLAUR	PPI	0.714285714285714
THBS1	PLG	PPI	0.666666666666667
THRB	TRIP12	PPI	0.666666666666667
MED18	MED18	PPI	0.904761904761905
HIPK3	FAS	PPI	0.666666666666667
SH3KBP1	PIK3R1	PPI	0.80952380952381
CD2	PTPRC	PPI	0.571428571428571
TBL1X	TBL1XR1	PPI	0.714285714285714
ITCH	JUN	PPI	0.714285714285714
CKS2	CKS2	PPI	0.904761904761905
NEDD9	LCK	PPI	0.714285714285714
FCER1A	FCER1G	PPI	0.666666666666667
HFE	TFRC	PPI	0.714285714285714
TICAM2	TICAM2	PPI	0.714285714285714
MBP	PRKCZ	PPI	0.571428571428571
FCER1A	FCER1A	PPI	0.952380952380952
ATPIF1	ATPIF1	PPI	0.761904761904762
CD247	CD48	PPI	0.666666666666667
IGHM	HPR	PPI	0.523809523809524
UBE2I	JUN	PPI	0.80952380952381
JUN	NCOA2	PPI	1
JUN	STAT3	PPI	1
CSNK1A1	PSEN2	PPI	0.952380952380952
APOE	APP	PPI	0.571428571428571
IGHG1	IGHG1	PPI	0.571428571428571
CASP4	SERPINB9	PPI	0.571428571428571
SH3KBP1	SH3KBP1	PPI	1
LCK	STAT1	PPI	0.904761904761905
ITLN1	ITLN1	PPI	0.714285714285714
KPNB1	RANBP2	PPI	0.571428571428571
LMO2	MLLT4	PPI	0.523809523809524
QKI	SERF2	PPI	0.619047619047619
APOA4	APOA4	PPI	0.523809523809524
FEZ2	PRKCZ	PPI	0.571428571428571
HLA-B	HLA-B	PPI	0.619047619047619
CAV1	CAV1	PPI	0.666666666666667
ITGB3BP	ITGB3BP	PPI	0.857142857142857
STMN1	STAT3	PPI	0.571428571428571
FGFR1	PIK3R1	PPI	0.523809523809524
SPAG9	SPAG9	PPI	0.904761904761905
IFNGR1	RAC1	PPI	0.666666666666667
CSNK1A1	LGALS3	PPI	0.523809523809524
CEBPA	CEBPA	PPI	0.523809523809524
CD2	CD48	PPI	0.619047619047619
DLG1	KCNJ2	PPI	0.857142857142857
PHF17	VHL	PPI	0.523809523809524
S100A12	S100A12	PPI	0.571428571428571
GADD45G	CCNB1	PPI	0.571428571428571
ZBTB16	HBEGF	PPI	0.571428571428571
PRKCD	YWHAB	PPI	0.523809523809524
UBE2I	UBE2I	PPI	0.80952380952381
DUSP1	HSPA4	PPI	1
SYK	STAT3	PPI	0.714285714285714
UBD	MAD2L1	PPI	0.619047619047619
UGCG	RTN1	PPI	0.523809523809524
ERBB3	PIK3R1	PPI	0.571428571428571
HDLBP	DHX9	PPI	0.571428571428571
CFLAR	PSEN2	PPI	0.904761904761905
PRKAB2	PRKAA1	PPI	0.619047619047619
LCK	STAT3	PPI	0.952380952380952
HIPK2	HIPK2	PPI	0.857142857142857
BHLHB2	STAT3	PPI	1
LEPR	JAK2	PPI	0.571428571428571
GDF15	GDF15	PPI	0.619047619047619
JAK2	STAT1	PPI	0.523809523809524
MX1	MX1	PPI	0.666666666666667
LRG1	FN1	PPI	0.80952380952381
TCF21	LMO4	PPI	0.523809523809524
RACGAP1	TUBG1	PPI	0.571428571428571
SEPT2	SEPT6	PPI	0.761904761904762
EGFR	PIK3C2A	PPI	0.857142857142857
CASP4	CASP4	PPI	0.571428571428571
UBE2D2	UBE2D2	PPI	0.666666666666667
UBE2I	TP53	PPI	0.571428571428571
ITGB2	ITGB2	PPI	0.619047619047619
BAX	NOL3	PPI	0.619047619047619
NUP62	NUP62	PPI	0.80952380952381
FEZ1	PRKCZ	PPI	0.571428571428571
CANX	IFNGR1	PPI	0.714285714285714
AURKA	TP53	PPI	0.571428571428571
IL6ST	IL6R	PPI	0.904761904761905
FN1	IGFBP5	PPI	0.952380952380952
AMBP	FN1	PPI	0.619047619047619
ARMCX2	ARMCX2	PPI	0.571428571428571
SERPINB9	GZMB	PPI	0.523809523809524
HSP90B1	HSP90B1	PPI	0.619047619047619
F11R	ITGAL	PPI	0.571428571428571
IFIT3	IFIT3	PPI	1
LCK	PRKCD	PPI	0.571428571428571
LGALS3BP	FN1	PPI	0.80952380952381
CDC2	STMN1	PPI	0.571428571428571
CD2	LCK	PPI	0.80952380952381
DNAJC7	RAD1	PPI	0.523809523809524
PPID	APP	PPI	0.619047619047619
TJP2	SH3KBP1	PPI	0.857142857142857
CDKN3	CDC2	PPI	0.761904761904762
RBP4	ALB	PPI	0.619047619047619
FGFR1	FGFR1	PPI	0.571428571428571
EFNB2	EFNB2	PPI	0.523809523809524
JUN	ETS2	PPI	1
CCL5	PIGR	PPI	0.857142857142857
KIF3B	LMO4	PPI	0.571428571428571
TFRC	CD247	PPI	0.666666666666667
RYBP	YY1	PPI	0.523809523809524
PRC1	RACGAP1	PPI	0.619047619047619
GPLD1	GM2A	PPI	0.857142857142857
ZFAND5	ZFAND5	PPI	0.523809523809524
DDX24	DDX24	PPI	0.80952380952381
ADAMTS1	VEGFA	PPI	0.857142857142857
LDLR	LDLR	PPI	1
IGFBP7	CXCL10	PPI	0.619047619047619
RPS27	RPS27	PPI	1
DLG1	FZD7	PPI	0.571428571428571
EED	YY1	PPI	0.619047619047619
AURKA	NME1	PPI	0.523809523809524
CNOT7	CDC2	PPI	0.523809523809524
PIK3R1	FYN	PPI	0.714285714285714
CD74	HLA-DPA1	PPI	0.523809523809524
KCNN2	KCNN2	PPI	0.571428571428571
MAGI1	CLCN5	PPI	0.571428571428571
ILF3	DHX9	PPI	0.571428571428571
PAK1	PAK1	PPI	0.523809523809524
KPNB1	IGFBP5	PPI	0.857142857142857
TRAF3IP1	TRAF3	PPI	0.619047619047619
NCOA2	NCOA2	PPI	1
FEZ1	WWC1	PPI	0.761904761904762
TFEC	TFEC	PPI	0.571428571428571
UPF3B	UPF3B	PPI	0.523809523809524
SOX5	SOX6	PPI	0.619047619047619
TP53	RRM2	PPI	0.523809523809524
PRKCB1	PRKCB1	PPI	1
TNFSF10	TNFSF10	PPI	0.714285714285714
MYCBP	MYC	PPI	0.714285714285714
KLF6	TP53	PPI	0.619047619047619
SF3B1	SMAD1	PPI	0.571428571428571
CTNNB1	MET	PPI	0.523809523809524
IGF2	IGFBP1	PPI	0.666666666666667
SKAP2	FYN	PPI	0.80952380952381
FYN	FAS	PPI	0.666666666666667
B4GALT1	B4GALT1	PPI	0.952380952380952
SFPQ	SFPQ	PPI	0.904761904761905
DPP4	CXCL11	PPI	0.666666666666667
CSNK1A1	CTNNB1	PPI	0.619047619047619
MYC	CDC2	PPI	0.857142857142857
PCBP2	SFRS7	PPI	0.523809523809524
TRAF3	TRAF3	PPI	0.904761904761905
FNBP1	AKAP9	PPI	0.714285714285714
MAGI1	IL6R	PPI	0.904761904761905
FN1	COL1A1	PPI	0.571428571428571
RACGAP1	RACGAP1	PPI	0.857142857142857
UBE2I	HIPK2	PPI	0.714285714285714
GZMB	GZMB	PPI	0.523809523809524
IL27RA	STAT1	PPI	0.952380952380952
FAS	FAS	PPI	0.714285714285714
PRKCB1	TOP2A	PPI	0.619047619047619
SLC16A10	RACGAP1	PPI	0.619047619047619
DNAJC7	NF1	PPI	0.80952380952381
SOCS3	EPOR	PPI	0.952380952380952
RAC1	NCK1	PPI	0.523809523809524
LEPR	PTPN11	PPI	0.523809523809524
IL7R	STAT3	PPI	0.904761904761905
THRB	THRB	PPI	1
GATM	GATM	PPI	0.619047619047619
SMAD4	JUNB	PPI	0.571428571428571
HBEGF	HBEGF	PPI	0.761904761904762
MED25	PPARBP	PPI	0.523809523809524
JUN	TOP2A	PPI	0.619047619047619
PRKCD	FYN	PPI	0.523809523809524
TYMS	TYMS	PPI	0.904761904761905
THRB	PPARBP	PPI	0.714285714285714
FN1	HGF	PPI	0.857142857142857
TP53	SERPINB9	PPI	0.619047619047619
MCL1	BAX	PPI	0.857142857142857
ZHX1	ZHX1	PPI	0.952380952380952
AURKA	NDC80	PPI	0.761904761904762
RPL14	PHLDA1	PPI	0.571428571428571
LGALS3BP	LGALS3	PPI	0.523809523809524
BRD7	BHLHB2	PPI	1
TAP2	TAP1	PPI	0.571428571428571
ANK3	HOOK1	PPI	0.761904761904762
SOX9	KPNB1	PPI	0.523809523809524
C5AR1	C5AR1	PPI	0.571428571428571
TP53	EGR1	PPI	0.619047619047619
PAH	PAH	PPI	0.904761904761905
ZHX1	BHLHB2	PPI	0.952380952380952
FEZ1	FEZ1	PPI	0.761904761904762
NUPL1	NUP62	PPI	0.80952380952381
CD2	CD247	PPI	0.80952380952381
CXCL13	CCL19	PPI	0.666666666666667
CDK5	CDK5	PPI	0.904761904761905
PSMC3IP	PSMC3IP	PPI	0.714285714285714
KPNB1	CSNK1A1	PPI	0.904761904761905
GSTM2	GSTM2	PPI	0.952380952380952
EGFR	FAS	PPI	0.571428571428571
FYN	NEDD9	PPI	0.714285714285714
HDAC4	REV3L	PPI	0.80952380952381
WASF2	BTK	PPI	0.523809523809524
DPP4	CXCL9	PPI	0.666666666666667
ATF7IP	KRT7	PPI	0.523809523809524
PTGS2	PTGS2	PPI	1
CDC14B	TP53	PPI	0.619047619047619
YWHAB	BCL2L11	PPI	0.952380952380952
TFG	C14orf1	PPI	0.666666666666667
MCM5	STAT1	PPI	0.761904761904762
CDKN3	CDKN3	PPI	0.761904761904762
CAV1	PTGS2	PPI	0.666666666666667
RAC2	SMAD1	PPI	0.80952380952381
GADD45G	C21orf6	PPI	0.571428571428571
SLC8A1	YWHAB	PPI	0.714285714285714
VHL	FN1	PPI	0.571428571428571
YTHDC1	FYN	PPI	0.571428571428571
FYN	FYB	PPI	0.571428571428571
SCARB2	THBS1	PPI	0.904761904761905
LCK	SH2D1A	PPI	0.714285714285714
NR5A2	ALB	PPI	1
KLF4	TP53	PPI	0.619047619047619
EGFR	MET	PPI	0.761904761904762
JUNB	JUNB	PPI	1
C10orf18	C10orf18	PPI	0.952380952380952
HIST2H2BE	TGM2	PPI	0.523809523809524
ITGB3BP	DDX24	PPI	0.714285714285714
ANGPTL1	ANGPTL1	PPI	0.523809523809524
ASCL1	ASCL1	PPI	0.80952380952381
ALCAM	ALCAM	PPI	0.904761904761905
CNDP1	CNDP1	PPI	0.666666666666667
CCDC91	CCDC91	PPI	1
TOPORS	UBE2I	PPI	0.523809523809524
CORO1A	THBS1	PPI	0.523809523809524
SYK	FYN	PPI	0.666666666666667
H2AFX	H2AFX	PPI	0.523809523809524
LAMA4	ZHX1	PPI	0.523809523809524
EGFR	EGFR	PPI	0.857142857142857
MET	PIK3R1	PPI	0.714285714285714
PTPN11	STAT3	PPI	0.523809523809524
DLG1	DLG1	PPI	0.904761904761905
NDC80	ZWINT	PPI	0.857142857142857
KCNJ16	KCNJ2	PPI	0.523809523809524
JUN	FOS	PPI	1
SMAD5	SF3B1	PPI	0.523809523809524
GTF2I	STAT1	PPI	0.523809523809524
PIK3R1	PIK3R1	PPI	0.80952380952381
STAT3	STAT3	PPI	1
EGFR	HBEGF	PPI	0.619047619047619
HSP90AB1	STAT3	PPI	0.523809523809524
DPP4	DPP4	PPI	0.666666666666667
CANX	APOB	PPI	0.714285714285714
TP53INP1	TP53	PPI	0.523809523809524
PIK3R1	EGFR	PPI	0.666666666666667
TF	IGFBP1	PPI	0.666666666666667
CD74	HLA-DQA1	PPI	0.571428571428571
PTGS1	PTGS1	PPI	0.571428571428571
MACF1	GOLGA4	PPI	0.857142857142857
DMD	DMD	PPI	0.523809523809524
GSTM1	GSTM1	PPI	1
ATOX1	ATOX1	PPI	0.619047619047619
SOCS3	LEPR	PPI	0.952380952380952
RAC1	PIK3R1	PPI	0.666666666666667
CDC2	CALD1	PPI	0.857142857142857
RRAGC	RRAGC	PPI	0.904761904761905
RGS2	PRKCB1	PPI	0.904761904761905
TAP2	HLA-C	PPI	0.619047619047619
S100A8	S100A8	PPI	0.666666666666667
IL6ST	ERBB3	PPI	0.761904761904762
TGM2	FN1	PPI	0.571428571428571
ATF3	TP53	PPI	0.619047619047619
MS4A1	LCK	PPI	0.904761904761905
PSMB8	TAP1	PPI	0.619047619047619
THRB	TP53	PPI	0.619047619047619
ABCD3	ABCD3	PPI	0.571428571428571
SPAG9	MYC	PPI	0.904761904761905
USP16	CDC2	PPI	0.523809523809524
RASGRP1	HRAS	PPI	0.523809523809524
FGF13	FGF13	PPI	0.523809523809524
PBK	TP53	PPI	0.523809523809524
TBL1X	CTNNB1	PPI	0.619047619047619
CD47	THBS1	PPI	0.666666666666667
CXCL10	CXCL10	PPI	0.952380952380952
FAS	MET	PPI	0.714285714285714
HDAC4	RUNX3	PPI	0.666666666666667
SERPINE1	SERPINE1	PPI	1
CD247	CD247	PPI	0.952380952380952
SOCS3	SOCS2	PPI	0.571428571428571
BCL2L11	RKHD1	PPI	0.571428571428571
HLA-A	HLA-A	PPI	0.619047619047619
IFIT1	IFIT3	PPI	1
SNRPN	TP53	PPI	0.523809523809524
SYN1	PIK3R1	PPI	0.571428571428571
IGF2	IGFBP5	PPI	0.666666666666667
MAP2	MAP2	PPI	0.571428571428571
DPP4	CCL5	PPI	0.666666666666667
PSMB7	PSMB7	PPI	0.571428571428571
SMAD1	SMARCE1	PPI	0.571428571428571
CD40	HSPA4	PPI	0.714285714285714
ATF3	JUND	PPI	0.857142857142857
TBN	TAF5	PPI	0.523809523809524
LPA	FN1	PPI	0.523809523809524
ETV6	ETV6	PPI	0.571428571428571
STAT1	STAT3	PPI	0.952380952380952
IGFBP7	VEGFA	PPI	0.619047619047619
NOL3	CASP2	PPI	0.523809523809524
ITGB3BP	CCNA2	PPI	0.571428571428571
NCK1	EGFR	PPI	0.523809523809524
FYN	CDK5	PPI	0.80952380952381
SFRS4	SIP1	PPI	0.523809523809524
S100A4	S100A4	PPI	0.523809523809524
RAPGEF2	RAP2B	PPI	0.619047619047619
HBB	HBB	PPI	0.523809523809524
UBE2I	RANBP2	PPI	0.571428571428571
SLC24A1	SLC24A1	PPI	0.761904761904762
RP9	U2AF1	PPI	0.80952380952381
APLP2	APLP2	PPI	0.857142857142857
PTPN11	IL6ST	PPI	0.523809523809524
SKAP2	SKAP2	PPI	0.904761904761905
GADD45B	CCNB1	PPI	0.571428571428571
CDC2	CDC2	PPI	0.857142857142857
CD247	FYN	PPI	0.904761904761905
SORBS2	PAK1	PPI	0.523809523809524
BRD7	HIST2H2BE	PPI	0.857142857142857
ITCH	ITCH	PPI	0.714285714285714
ANK3	FAS	PPI	0.714285714285714
HSD17B14	HSD17B14	PPI	0.571428571428571
TRIM32	TRIM32	PPI	0.619047619047619
SORBS2	MLLT4	PPI	0.761904761904762
PLG	PLG	PPI	0.666666666666667
PRKAB1	PRKAA1	PPI	0.523809523809524
HLA-B	ATF7IP	PPI	0.619047619047619
CETP	CETP	PPI	0.714285714285714
SMAD1	SMAD1	PPI	0.952380952380952
RAC1	RAC1	PPI	0.666666666666667
ZBED1	UBE2I	PPI	0.714285714285714
AP1S1	AP1S1	PPI	0.523809523809524
CAV1	GRK5	PPI	0.619047619047619
TRIM21	TRIM21	PPI	0.571428571428571
MLLT10	MLLT10	PPI	0.80952380952381
ETS2	SMARCA4	PPI	0.619047619047619
RORA	PROX1	PPI	0.714285714285714
TRAF3	CD40	PPI	0.666666666666667
TOPORS	TOPORS	PPI	0.571428571428571
CTTN	CTTN	PPI	0.666666666666667
MET	CTTN	PPI	0.619047619047619
TFRC	TFRC	PPI	0.714285714285714
CCR2	CCL2	PPI	0.904761904761905
EPAS1	VHL	PPI	0.571428571428571
SMAD4	SMAD4	PPI	0.571428571428571
RAC2	SMAD4	PPI	0.523809523809524
ALPL	TRAF3	PPI	0.619047619047619
SERPINE1	PLG	PPI	0.666666666666667
CCL2	CCL2	PPI	0.904761904761905
SKAP2	FYB	PPI	0.619047619047619
TLR3	TLR3	PPI	0.619047619047619
JUN	JUN	PPI	1
CTSC	CTSC	PPI	0.619047619047619
STK35	STK35	PPI	0.761904761904762
YWHAB	YWHAB	PPI	0.952380952380952
ATF7IP	RRBP1	PPI	0.714285714285714
PRKAR1A	EGFR	PPI	0.857142857142857
RANBP2	HDAC4	PPI	0.571428571428571
DNAJC7	DNAJC7	PPI	0.904761904761905
CDC2	TK1	PPI	0.571428571428571
JUN	EGR1	PPI	1
FN1	SMAD4	PPI	0.571428571428571
ATF7	FOS	PPI	0.571428571428571
TAP1	HLA-F	PPI	0.619047619047619
UBE4B	DNAJC7	PPI	0.523809523809524
PRKAR1A	PYCARD	PPI	0.523809523809524
UBE2I	FAS	PPI	0.523809523809524
AURKA	AURKA	PPI	0.80952380952381
TBL1XR1	HIST2H2BE	PPI	0.619047619047619
PDCD6	PDCD6	PPI	0.619047619047619
PSPH	PSPH	PPI	0.904761904761905
MCL1	BCL2L11	PPI	1
DPP4	PTPRC	PPI	0.523809523809524
SYK	SYK	PPI	0.714285714285714
AMBP	ALB	PPI	0.619047619047619
CENTG2	CENTG2	PPI	0.80952380952381
NR1D2	UBE2I	PPI	0.571428571428571
NCOA2	DDX17	PPI	0.952380952380952
PHLDA1	HSPA4	PPI	1
TJP2	CTNNA1	PPI	0.571428571428571
CD2	FYN	PPI	0.761904761904762
IMMT	IMMT	PPI	0.714285714285714
STAT1	STAT1	PPI	0.952380952380952
FYN	GRB10	PPI	0.571428571428571
PRKD2	PRKD2	PPI	0.523809523809524
HRAS	PIK3R1	PPI	0.523809523809524
ZMYM2	SFPQ	PPI	0.666666666666667
ANKRD11	HDAC4	PPI	0.904761904761905
SEC24D	LMO4	PPI	0.619047619047619
CALCOCO2	CALCOCO2	PPI	0.761904761904762
VIL2	VIL2	PPI	0.523809523809524
DDX3X	NUP62	PPI	0.714285714285714
EPOR	EPOR	PPI	1
BACE2	BACE2	PPI	0.761904761904762
YY1	MYC	PPI	1
CTNNB1	PSEN2	PPI	0.571428571428571
CASP1	CASP1	PPI	0.80952380952381
NME1	NME1	PPI	0.666666666666667
PRKCB1	PTPN11	PPI	0.523809523809524
ERBB3	ERBB3	PPI	0.761904761904762
PTEN	TP53	PPI	0.619047619047619
PRKCB1	MARCKS	PPI	0.666666666666667
ITGB5	ITGB5	PPI	0.80952380952381
CCNA2	CDC2	PPI	0.619047619047619
RAC1	STAT3	PPI	0.666666666666667
HERC5	CCNB1	PPI	0.523809523809524
TM2D1	APP	PPI	0.666666666666667
PTPN11	IFNGR1	PPI	0.523809523809524
ST6GAL1	ST6GAL1	PPI	0.857142857142857
EGFR	STAT3	PPI	0.857142857142857
EGFR	ALCAM	PPI	0.761904761904762
CDC2	CKS2	PPI	0.80952380952381
S100A8	C14orf1	PPI	0.571428571428571
FNBP1	WASL	PPI	0.523809523809524
PTPRK	PTPRK	PPI	0.952380952380952
PLA2G2A	PLA2G2A	PPI	0.857142857142857
GSTM2	GSTM1	PPI	0.952380952380952
CD40	PIK3R1	PPI	0.571428571428571
PDGFA	PDGFA	PPI	0.523809523809524
ATP6V1A	ATP6V1A	PPI	0.666666666666667
FN1	FST	PPI	1
NUP62	TRAF3	PPI	0.761904761904762
DUT	DUT	PPI	0.571428571428571
NRD1	HBEGF	PPI	0.619047619047619
CDC2	TOP2A	PPI	0.619047619047619
SMAD4	JUN	PPI	0.571428571428571
SOCS3	EGFR	PPI	0.80952380952381
MAD2L1	MAD2L1	PPI	0.619047619047619
C6orf111	PNN	PPI	0.523809523809524
SERPINB9	BRD7	PPI	1
S100A4	SEPT6	PPI	0.523809523809524
PRKCD	STAT3	PPI	0.571428571428571
LMO2	STAT1	PPI	0.571428571428571
DLG1	PTEN	PPI	0.904761904761905
PCBP2	PCBP2	PPI	0.619047619047619
NDC80	MAD2L1	PPI	0.619047619047619
PROX1	NR5A2	PPI	1
CASP1	PSEN2	PPI	0.80952380952381
HIST2H2BE	HSPD1	PPI	0.666666666666667
TFG	TFG	PPI	0.952380952380952
IVD	IVD	PPI	0.666666666666667
PSMC3IP	THRB	PPI	0.714285714285714
YWHAB	HSP90AB1	PPI	0.523809523809524
TACC1	AURKA	PPI	0.714285714285714
RAC1	ARHGEF7	PPI	0.619047619047619
ZBTB16	ZBTB16	PPI	0.714285714285714
MLLT4	CTNNA1	PPI	0.523809523809524
FEZ2	NEK1	PPI	0.619047619047619
FNBP1	FNBP1	PPI	0.761904761904762
PRKCZ	FYN	PPI	0.666666666666667
FEZ1	SMC3	PPI	0.666666666666667
CXCL2	CXCL2	PPI	0.952380952380952
FOXP1	FOXP1	PPI	0.857142857142857
ATF3	JUN	PPI	1
AKAP13	YWHAB	PPI	0.714285714285714
ITGAL	ITGAL	PPI	0.857142857142857
THBS1	FN1	PPI	1
AXL	AXL	PPI	0.523809523809524
WASL	WIPF2	PPI	0.714285714285714
TDRD7	TACC1	PPI	0.666666666666667
FYN	MAP2	PPI	0.571428571428571
PSMB9	NCOA2	PPI	0.714285714285714
HDAC4	HDAC4	PPI	1
PLD1	PLD1	PPI	0.714285714285714
KLF4	KLF6	PPI	1
GPSM2	GPSM2	PPI	0.761904761904762
FYN	CAV1	PPI	0.619047619047619
SOX6	SOX6	PPI	0.952380952380952
RUNX2	FOS	PPI	0.571428571428571
CD247	PTPRC	PPI	0.619047619047619
IGHD	IGHD	PPI	0.571428571428571
HMGN1	HMGN1	PPI	0.523809523809524
SSX2IP	SSX2IP	PPI	0.571428571428571
NR4A1	NR4A1	PPI	1
C3orf10	NCK1	PPI	0.523809523809524
THRB	JMJD1C	PPI	1
GZMA	GZMA	PPI	0.80952380952381
JUNB	FOSB	PPI	1
TAF5	TAF15	PPI	0.714285714285714
NCOA2	SMARCE1	PPI	0.571428571428571
CDC42BPA	CDC42BPA	PPI	0.80952380952381
PTP4A1	PTP4A1	PPI	0.619047619047619
CD2	CD58	PPI	0.571428571428571
BCL2L11	BCL2L11	PPI	1
STAT3	FOS	TRI	1
YY1	TP53	TRI	0.619047619047619
EGR1	EGFR	TRI	0.857142857142857
STAT1	ISG15	TRI	0.666666666666667
ATF7	SELE	TRI	0.523809523809524
TP53	RPS27L	TRI	0.523809523809524
TP53	FRMD4A	TRI	0.571428571428571
CEBPA	GADD45G	TRI	0.523809523809524
TP53	DUSP1	TRI	0.619047619047619
NR5A2	CETP	TRI	0.714285714285714
STAT1	FOS	TRI	0.952380952380952
FOS	APOH	TRI	0.857142857142857
YY1	TF	TRI	0.714285714285714
BHLHB2	BHLHB2	TRI	1
TP53	SERPINE1	TRI	0.619047619047619
MYC	MYC	TRI	1
FOS	SERPINE1	TRI	1
CEBPD	CCR2	TRI	0.952380952380952
STAT1	IFITM1	TRI	0.523809523809524
CEBPA	CCR2	TRI	0.523809523809524
FOS	MYC	TRI	1
TP53	BAX	TRI	0.571428571428571
NF1	ALB	TRI	0.904761904761905
ATF3	ATF3	TRI	1
TP53	PTEN	TRI	0.619047619047619
TP53	CHD2	TRI	0.523809523809524
TP53	TP53AP1	TRI	0.571428571428571
TP53	ZCCHC2	TRI	0.571428571428571
MYC	AGPAT3	TRI	1
CEBPA	ALB	TRI	0.523809523809524
YY1	APOH	TRI	0.857142857142857
KLF13	CCL5	TRI	1
JUN	SELE	TRI	0.80952380952381
GTF2I	FOS	TRI	0.571428571428571
FOS	JUN	TRI	1
TCF7L2	MYC	TRI	0.80952380952381
ATF3	CGA	TRI	0.952380952380952
CEBPD	CCL5	TRI	0.952380952380952
CD40	FAS	TRI	0.619047619047619
YY1	HBD	TRI	0.666666666666667
TP53	PCNX	TRI	0.571428571428571
STAT1	CCL2	TRI	0.857142857142857
LEF1	LEF1	TRI	0.619047619047619
MYC	TP53	TRI	0.619047619047619
JUN	CCL5	TRI	1
EGR1	PTP4A1	TRI	0.619047619047619
TP53	CAV1	TRI	0.523809523809524
STAT3	CRP	TRI	0.904761904761905
EGR1	EGR1	TRI	1
ETS2	CDC2	TRI	0.857142857142857
JUN	FN1	TRI	1
TP53	GSPT1	TRI	0.619047619047619
JUN	JUN	TRI	1
STAT1	IFIT2	TRI	0.904761904761905
FOXO1	IGFBP1	TRI	0.571428571428571
ETS2	SCARA5	TRI	0.714285714285714
MYC	BACH1	TRI	0.666666666666667
NF1	CGA	TRI	0.857142857142857
DBP	ALB	TRI	0.80952380952381
FOS	CGA	TRI	0.952380952380952
JUN	CGA	TRI	0.952380952380952
ATF3	SELE	TRI	0.80952380952381
CEBPD	TF	TRI	0.666666666666667
TP53	SLC16A10	TRI	0.523809523809524
STAT1	CD40	TRI	0.666666666666667
TP53	TP53	TRI	0.619047619047619
STAT1	MYC	TRI	0.952380952380952
NF1	CYP11A1	TRI	0.619047619047619
STAT1	STAT1	TRI	0.952380952380952
NF1	FOS	TRI	0.904761904761905
TP53	VEGFA	TRI	0.619047619047619
CEBPD	FGA	TRI	0.619047619047619
YY1	CETP	TRI	0.714285714285714
STAT1	IFI6	TRI	0.714285714285714
TP53	TCF7L2	TRI	0.619047619047619
EGR1	PDGFA	TRI	0.523809523809524
FOS	FOS	TRI	1
FOS	TP53	TRI	0.619047619047619
TP53	USP34	TRI	0.619047619047619
TP53	EGFR	TRI	0.523809523809524
EGR1	TP53	TRI	0.619047619047619
TP53	RABGAP1L	TRI	0.523809523809524
NR5A2	CYP7A1	TRI	0.80952380952381
SOX4	CD2	TRI	0.523809523809524
RUNX2	FN1	TRI	0.571428571428571
CEBPD	APOB	TRI	0.80952380952381
CEBPA	LDLR	TRI	0.523809523809524
NF1	APOB	TRI	0.761904761904762
CEBPD	PTGS2	TRI	0.952380952380952
NR5A2	ALB	TRI	1
SMAD4	JUN	TRI	0.571428571428571
JUN	TP53	TRI	0.619047619047619
CD40	TP53	TRI	0.523809523809524
TP53	CCNG2	TRI	0.619047619047619
NF1	RBP4	TRI	0.571428571428571
TP53	CASP1	TRI	0.523809523809524
YY1	FOS	TRI	1
CEBPD	CRP	TRI	0.857142857142857
CEBPD	LDLR	TRI	0.952380952380952
NF1	FN1	TRI	0.904761904761905
TCF3	FOS	TRI	0.523809523809524
FOLR1	MYC	TRI	0.619047619047619
NF1	RACGAP1	TRI	0.761904761904762
CD40	CCL5	TRI	0.714285714285714
YY1	DMD	TRI	0.523809523809524
SMAD4	SERPINE1	TRI	0.571428571428571
CEBPD	IL8	TRI	0.952380952380952
TP53	ATF3	TRI	0.619047619047619
TP53	CALD1	TRI	0.619047619047619
JUNB	CGA	TRI	0.952380952380952
MYC	ZNF295	TRI	0.80952380952381
EGR1	SYN1	TRI	0.666666666666667
EGR1	VEGFA	TRI	0.857142857142857
CEBPA	IL8	TRI	0.523809523809524
TP53	PTGS2	TRI	0.619047619047619
JUN	APOH	TRI	0.857142857142857
CEBPA	APOB	TRI	0.523809523809524
KLF13	CYP1A1	TRI	0.952380952380952
JUN	ATF3	TRI	1
IKZF1	LCK	TRI	0.571428571428571
TP53	SBF2	TRI	0.571428571428571
TP53	ANKRD11	TRI	0.523809523809524
YY1	EPOR	TRI	1

## Sheet: Cirrhosis
Protein1	Protein2	Iteraction type	Frequence
ID4	ID3	PPI	0.538461538461538
IL23A	IL23A	PPI	0.692307692307692
CXCL10	CXCL10	PPI	1
THBS1	COL1A1	PPI	0.615384615384615
MMP2	COL6A3	PPI	0.538461538461538
BCL2	BCL2	PPI	0.692307692307692
COL4A1	COL4A2	PPI	0.615384615384615
SERPINE1	SERPINE1	PPI	0.769230769230769
SPINT2	HGFAC	PPI	0.538461538461538
THBS2	MMP2	PPI	0.615384615384615
IFIT3	IFIT3	PPI	0.769230769230769
EPHA3	EPHA3	PPI	0.923076923076923
CD2	LCK	PPI	0.615384615384615
HLA-A	HLA-A	PPI	0.769230769230769
IFIT1	IFIT3	PPI	0.769230769230769
MAP2	MAP2	PPI	0.846153846153846
HGF	HGF	PPI	0.538461538461538
ETV6	ETV6	PPI	0.538461538461538
ESR1	ESR1	PPI	0.538461538461538
CRP	CRP	PPI	0.692307692307692
CCL5	PIGR	PPI	0.692307692307692
HLA-DRA	HLA-DMA	PPI	0.615384615384615
LCK	ITK	PPI	0.615384615384615
MMP7	CD44	PPI	0.538461538461538
CD74	CD74	PPI	1
MID1	MID1	PPI	0.615384615384615
COL1A1	CD44	PPI	0.538461538461538
TACSTD1	TACSTD1	PPI	1
SLC31A1	SLC31A1	PPI	0.615384615384615
MMP2	PZP	PPI	0.769230769230769
PDGFRA	PDGFRA	PPI	0.846153846153846
TAP2	HLA-G	PPI	0.538461538461538
SLC1A2	SLC1A2	PPI	0.538461538461538
CRYBB2	CRYBB2	PPI	0.615384615384615
IGFBP7	CXCL10	PPI	0.769230769230769
ITCH	ITCH	PPI	0.538461538461538
CXCR4	ADRBK2	PPI	0.538461538461538
HSD17B14	HSD17B14	PPI	0.846153846153846
ST8SIA4	ST8SIA4	PPI	0.615384615384615
VWF	COL1A1	PPI	0.692307692307692
CD74	HLA-DPA1	PPI	0.692307692307692
HLA-DRB1	HLA-DRA	PPI	0.692307692307692
CD69	CD69	PPI	0.769230769230769
TESC	TESC	PPI	0.538461538461538
KCNN2	KCNN2	PPI	1
LCK	LCK	PPI	0.615384615384615
VCAN	CD44	PPI	0.538461538461538
PLAT	SERPINE1	PPI	0.538461538461538
ANXA2	S100A6	PPI	0.538461538461538
BCHE	BCHE	PPI	1
IGFBP7	CCL5	PPI	0.692307692307692
SOD2	SOD2	PPI	0.692307692307692
HLA-DMA	CD74	PPI	0.692307692307692
PLAT	PLAT	PPI	0.615384615384615
PLA2G2A	VCAN	PPI	0.615384615384615
TFRC	TFRC	PPI	0.538461538461538
CASP1	IL18	PPI	0.615384615384615
TRPM4	TRPM4	PPI	0.615384615384615
COL1A2	CD44	PPI	0.538461538461538
TAP1	HLA-G	PPI	0.538461538461538
SLAMF7	SLAMF7	PPI	0.615384615384615
CTSC	CTSC	PPI	0.538461538461538
THBS2	THBS2	PPI	0.615384615384615
NEDD9	NEDD9	PPI	0.769230769230769
S100P	S100P	PPI	0.692307692307692
IFITM1	IFITM1	PPI	0.615384615384615
LCP2	ITK	PPI	0.538461538461538
HLA-G	HLA-G	PPI	0.615384615384615
CD74	HLA-DQB1	PPI	1
LDHB	LDHB	PPI	0.538461538461538
VWF	COL1A2	PPI	0.692307692307692
SDCBP2	SDCBP2	PPI	0.615384615384615
GNMT	GNMT	PPI	0.692307692307692
TAP1	HLA-F	PPI	0.692307692307692
F11	F11	PPI	0.538461538461538
PSPH	PSPH	PPI	1
CFTR	CFTR	PPI	0.923076923076923
JAG1	THBS1	PPI	0.615384615384615
LGALS3BP	LGALS3	PPI	0.923076923076923
VWF	VWF	PPI	0.769230769230769
CFHR4	CFHR4	PPI	0.923076923076923
SLIT2	SLIT2	PPI	0.692307692307692
LCK	VIL2	PPI	0.538461538461538
TAP2	TAP1	PPI	0.692307692307692
CCL19	CCL19	PPI	0.923076923076923
MMP2	LGALS3	PPI	0.769230769230769
LOXL1	FBLN5	PPI	0.615384615384615
PDGFRA	STAT1	PPI	0.846153846153846
CCL5	CCL5	PPI	0.846153846153846
LEF1	RUNX2	PPI	0.692307692307692
CHI3L1	CHI3L1	PPI	0.923076923076923
STAT1	STAT1	PPI	1
CFTR	VIL2	PPI	0.692307692307692
TRIM31	TRIM31	PPI	0.538461538461538
TIMP1	MMP2	PPI	0.692307692307692
GSTM2	GSTM2	PPI	0.846153846153846
CD44	CD44	PPI	0.538461538461538
VIL2	VIL2	PPI	0.692307692307692
TRAF5	TRAF5	PPI	0.538461538461538
BACE2	BACE2	PPI	0.846153846153846
IFI16	ID3	PPI	0.538461538461538
SPP1	CD44	PPI	0.538461538461538
CASP1	CASP1	PPI	0.692307692307692
MX2	MX2	PPI	0.692307692307692
VIM	VIM	PPI	0.846153846153846
SOX5	SOX5	PPI	0.538461538461538
CCL20	VCAN	PPI	0.615384615384615
ITK	ITK	PPI	0.769230769230769
MMP2	COL1A1	PPI	0.769230769230769
IL8	IL8	PPI	0.846153846153846
MAFF	MAFF	PPI	0.538461538461538
CD74	HLA-DRA	PPI	0.692307692307692
HLA-F	HLA-F	PPI	0.769230769230769
DLL1	DLL1	PPI	0.538461538461538
HLA-DRB1	HLA-DMA	PPI	0.692307692307692
MMP7	SPP1	PPI	0.692307692307692
STAT1	CXCR4	PPI	0.846153846153846
COL4A2	COL4A2	PPI	0.692307692307692
STK39	SLC12A2	PPI	0.538461538461538
PDK4	PDK4	PPI	0.538461538461538
CXCL10	VCAN	PPI	0.769230769230769
PLA2G2A	PLA2G2A	PPI	0.846153846153846
GSTM2	GSTM1	PPI	0.846153846153846
PDGFA	PDGFA	PPI	0.615384615384615
LGALS3BP	LGALS3BP	PPI	1
PTPRC	PTPRC	PPI	0.538461538461538
CD2	PTPRC	PPI	0.538461538461538
RNASE1	RNASE1	PPI	0.692307692307692
ASCL1	ASCL1	PPI	0.923076923076923
NEDD9	LCK	PPI	0.615384615384615
IGFBP7	CCL21	PPI	0.692307692307692
CNDP1	CNDP1	PPI	0.923076923076923
CSTA	CSTA	PPI	0.615384615384615
NTS	CPE	PPI	0.615384615384615
FCER1A	FCER1A	PPI	0.615384615384615
PDGFRA	PDGFA	PPI	0.615384615384615
IGHM	HPR	PPI	0.615384615384615
CCL21	CCR7	PPI	0.692307692307692
CD74	CD44	PPI	0.538461538461538
COL4A1	COL4A1	PPI	0.615384615384615
IGHG1	IGHG1	PPI	0.923076923076923
GPX2	GPX2	PPI	0.692307692307692
TNFRSF10A	TNFRSF10A	PPI	0.538461538461538
NFASC	NFASC	PPI	0.769230769230769
TIMP2	MMP2	PPI	0.538461538461538
LCK	STAT1	PPI	0.615384615384615
SLC12A2	SLC12A2	PPI	0.769230769230769
S100A6	S100A6	PPI	0.769230769230769
FHL2	FHL2	PPI	0.538461538461538
DEFB1	VIM	PPI	0.692307692307692
FBLN5	LPA	PPI	0.538461538461538
IVD	IVD	PPI	0.846153846153846
HLA-B	HLA-B	PPI	0.846153846153846
IGJ	IGHM	PPI	0.846153846153846
AQP1	AQP1	PPI	0.923076923076923
FAP	FAP	PPI	0.538461538461538
HGD	HGD	PPI	0.692307692307692
CDC42EP3	CDC42EP3	PPI	0.615384615384615
CCL5	VCAN	PPI	0.692307692307692
LUM	COL1A2	PPI	0.846153846153846
FAT	HOMER1	PPI	0.538461538461538
CCL19	CCR7	PPI	0.692307692307692
S100A12	S100A12	PPI	0.615384615384615
VCAN	VCAN	PPI	0.769230769230769
HOMER1	HOMER1	PPI	0.538461538461538
VIM	SH3YL1	PPI	0.846153846153846
CD74	HLA-DQA1	PPI	1
GSTM1	GSTM1	PPI	0.846153846153846
HSPB8	HSPB8	PPI	0.538461538461538
CCL21	VCAN	PPI	0.769230769230769
HIPK2	HIPK2	PPI	0.538461538461538
CXCR4	CXCR4	PPI	0.846153846153846
MX1	MX1	PPI	1
THBS1	MMP2	PPI	0.538461538461538
LEPR	LEPR	PPI	0.769230769230769
TSC22D3	TSC22D3	PPI	0.692307692307692
SIGIRR	SIGIRR	PPI	0.846153846153846
IGHD	IGHD	PPI	0.923076923076923
TAX1BP3	GLS	PPI	0.692307692307692
TAP2	HLA-C	PPI	0.846153846153846
S100A8	S100A8	PPI	0.538461538461538
GZMA	GZMA	PPI	0.692307692307692
LGALS3BP	COL5A1	PPI	0.692307692307692
IFIT2	IFIT3	PPI	0.769230769230769
ID3	ID3	PPI	0.538461538461538
STAT1	ISG15	TRI	0.923076923076923
STAT1	IFIT2	TRI	0.923076923076923
SOX4	CD2	TRI	0.846153846153846
STAT1	STAT1	TRI	1
RUNX2	SPP1	TRI	0.615384615384615
FLI1	COL1A2	TRI	0.615384615384615
RUNX2	LGALS3	TRI	0.692307692307692
LEF1	LEF1	TRI	0.769230769230769
STAT1	VIM	TRI	0.846153846153846
STAT1	IFI6	TRI	1
FOXF1	IL8	TRI	0.538461538461538
STAT1	IFITM1	TRI	0.615384615384615

## Sheet: BCLC stage 0 HCC
Protein1	Protein2	Iteraction type	Frequence
ETS2	NCOR1	PPI	0.555555555555556
MAPK1	PPARA	PPI	0.555555555555556
MAPK1	SOS1	PPI	0.555555555555556
IL23A	IL23A	PPI	0.555555555555556
ZBTB16	ANAPC5	PPI	0.555555555555556
SFRS2IP	SFRS3	PPI	0.777777777777778
ZNF521	EBF1	PPI	0.555555555555556
CLU	PON1	PPI	0.555555555555556
TPR	NUP153	PPI	0.777777777777778
FNTB	RRAS2	PPI	0.555555555555556
IL6R	IL6R	PPI	0.666666666666667
EBAG9	EBAG9	PPI	0.555555555555556
NDC80	NDC80	PPI	0.888888888888889
SHC1	CALD1	PPI	0.666666666666667
YWHAB	TJP2	PPI	0.555555555555556
DLGAP4	DLG1	PPI	0.555555555555556
SPEN	NCOR1	PPI	0.888888888888889
ALB	AGA	PPI	0.555555555555556
DGKZ	LEPR	PPI	0.666666666666667
SGOL2	PPP2R1B	PPI	0.888888888888889
TPD52L1	TPD52L1	PPI	0.666666666666667
FN1	COL1A2	PPI	0.777777777777778
RAB5A	RAB5A	PPI	0.666666666666667
CCNB2	CDC2	PPI	0.555555555555556
CASP1	PSEN1	PPI	0.555555555555556
RASSF5	KRAS	PPI	0.777777777777778
PTK2	VIL2	PPI	0.666666666666667
PAFAH1B1	MAP2	PPI	0.777777777777778
SMAD4	SQSTM1	PPI	0.555555555555556
XRCC5	NARG1	PPI	0.666666666666667
STX16	VAMP3	PPI	0.555555555555556
ARNT	ESR1	PPI	0.555555555555556
BHLHB2	BHLHB2	PPI	0.777777777777778
PRPF40A	PRPF40A	PPI	0.666666666666667
ESR1	ESR1	PPI	0.888888888888889
SHC1	SOS1	PPI	0.555555555555556
GNA13	CDH1	PPI	0.555555555555556
CRP	CRP	PPI	1
RRM1	RRM2	PPI	0.555555555555556
FYN	MS4A1	PPI	0.666666666666667
EGFR	SCAMP1	PPI	0.555555555555556
RASSF5	RRAS2	PPI	0.555555555555556
SMAD5	SFPQ	PPI	0.555555555555556
SPARC	PLG	PPI	0.666666666666667
RASSF5	RAP2A	PPI	0.666666666666667
MAPK8IP3	MAP2K1	PPI	0.555555555555556
TBL1XR1	NCOR1	PPI	0.888888888888889
STAT5B	MAPK1	PPI	0.555555555555556
CD74	CD74	PPI	0.888888888888889
ZMYM2	FUS	PPI	0.555555555555556
DTNA	SNTB1	PPI	0.666666666666667
EP300	CHD4	PPI	0.666666666666667
MID1	MID1	PPI	0.666666666666667
SFRS3	PCBP2	PPI	0.777777777777778
SEC61A1	SEC61A1	PPI	0.777777777777778
GHR	GHR	PPI	1
GSN	FN1	PPI	0.555555555555556
DAZAP2	SOX6	PPI	0.555555555555556
GHR	JAK1	PPI	0.777777777777778
TGM2	SPARC	PPI	0.555555555555556
HSP90AB1	HSP90AB1	PPI	0.666666666666667
PPID	SMURF2	PPI	0.555555555555556
SMARCA4	TMF1	PPI	0.555555555555556
ATF3	ATF3	PPI	0.777777777777778
SOCS3	IL6ST	PPI	0.555555555555556
IL6ST	JAK1	PPI	0.777777777777778
NDRG1	CDH1	PPI	0.555555555555556
EFEMP1	TIMP3	PPI	0.666666666666667
YWHAE	CALM1	PPI	0.666666666666667
IL1RAP	IL1B	PPI	0.666666666666667
EGFR	MAPK1	PPI	0.555555555555556
CTNNB1	EP300	PPI	0.666666666666667
NR2F2	HIPK3	PPI	0.666666666666667
CLDN1	CLDN1	PPI	0.555555555555556
ACTB	ATF7IP	PPI	0.555555555555556
GPHN	GPHN	PPI	0.777777777777778
SKP1A	TBL1X	PPI	0.666666666666667
TP53	CDKN2C	PPI	0.555555555555556
UGP2	UGP2	PPI	0.777777777777778
IGFBP7	IGF1	PPI	0.555555555555556
TGFBR2	CLU	PPI	0.555555555555556
PTN	PTN	PPI	0.555555555555556
PAFAH1B1	CLIP1	PPI	0.777777777777778
SMAD4	TGFBR2	PPI	0.555555555555556
PRSS23	RACGAP1	PPI	0.555555555555556
IGFBP3	CD44	PPI	0.666666666666667
PSEN1	CDH1	PPI	0.555555555555556
PGF	PGF	PPI	0.555555555555556
SOCS3	GHR	PPI	0.555555555555556
GRB10	EGFR	PPI	0.555555555555556
STAT1	MDK	PPI	0.555555555555556
GRK5	GRK5	PPI	0.666666666666667
CDH1	CTNNB1	PPI	0.666666666666667
STRAP	STRAP	PPI	0.666666666666667
SQSTM1	SQSTM1	PPI	1
CXCL13	CCL21	PPI	0.555555555555556
EGFR	S100A9	PPI	0.666666666666667
GRB10	MAP2K1	PPI	0.888888888888889
ERBB3	EGFR	PPI	0.555555555555556
ST8SIA4	ST8SIA4	PPI	0.666666666666667
AKT2	AKT2	PPI	0.666666666666667
SPARC	PDGFA	PPI	0.666666666666667
CRKL	EPOR	PPI	0.555555555555556
DTNA	UTRN	PPI	0.555555555555556
CDH1	RRM2	PPI	0.666666666666667
GART	GART	PPI	0.888888888888889
ATG10	ATG12	PPI	0.555555555555556
PECAM1	CTNNB1	PPI	0.777777777777778
F13A1	F13A1	PPI	0.555555555555556
SNX4	INSR	PPI	0.555555555555556
ITGAV	SPP1	PPI	0.555555555555556
KIF5B	RRBP1	PPI	0.555555555555556
S100A9	S100A9	PPI	0.888888888888889
PLG	S100A10	PPI	0.555555555555556
IGFBP7	CCL5	PPI	0.555555555555556
WASF2	WASF2	PPI	0.888888888888889
SMARCA2	ESR1	PPI	0.555555555555556
DVL3	CTNNB1	PPI	0.555555555555556
MMP9	PZP	PPI	0.666666666666667
FOS	LMNA	PPI	0.555555555555556
IFI27	CCND1	PPI	0.555555555555556
SH3KBP1	CBL	PPI	0.666666666666667
THBS1	SPARC	PPI	0.777777777777778
COL4A1	SAA4	PPI	0.555555555555556
TGFBR2	TGFBR1	PPI	0.555555555555556
MAPK1	DUSP1	PPI	0.666666666666667
DAZAP2	SMURF2	PPI	0.666666666666667
GSTM4	GSTM4	PPI	0.555555555555556
WASF2	FYN	PPI	0.666666666666667
KRAS	CALM1	PPI	0.666666666666667
GNB2L1	INSR	PPI	0.555555555555556
FYN	CBL	PPI	0.666666666666667
STAT5B	STAT5B	PPI	0.555555555555556
TPD52L1	TPD52	PPI	0.555555555555556
TGFBR1	CD44	PPI	0.555555555555556
COL6A2	FN1	PPI	0.777777777777778
TACC1	TACC1	PPI	0.666666666666667
FYN	PTPRF	PPI	0.555555555555556
PECAM1	PECAM1	PPI	0.888888888888889
STK4	STK4	PPI	0.777777777777778
FYN	CD44	PPI	0.555555555555556
CYCS	FDX1	PPI	0.555555555555556
F5	F5	PPI	0.888888888888889
TPR	MAPK1	PPI	0.666666666666667
PLAT	PLAT	PPI	0.888888888888889
PLA2G2A	VCAN	PPI	0.777777777777778
CXCR4	PTPRC	PPI	0.666666666666667
THBS1	MMP9	PPI	0.555555555555556
MSN	CD46	PPI	0.555555555555556
ARHGAP21	RHOA	PPI	0.666666666666667
SH3KBP1	SOS1	PPI	0.666666666666667
PPARA	PPARA	PPI	0.666666666666667
MLL	MLL	PPI	0.555555555555556
C19orf2	C19orf2	PPI	0.555555555555556
ERBB3	SOS1	PPI	0.555555555555556
SCAMP1	SNAP23	PPI	0.666666666666667
SMAD4	SPTBN1	PPI	0.555555555555556
C8A	CD59	PPI	0.555555555555556
CAMK2D	VIM	PPI	0.555555555555556
PRDX4	PRDX4	PPI	0.666666666666667
S100P	S100P	PPI	0.666666666666667
NBN	TERF1	PPI	0.555555555555556
CBLB	CRKL	PPI	0.555555555555556
CXCL12	CXCL12	PPI	0.666666666666667
CLU	PRNP	PPI	0.666666666666667
SLC4A4	CA2	PPI	0.555555555555556
EGFR	CALM1	PPI	0.666666666666667
ANKRD11	NCOA2	PPI	0.777777777777778
ETS1	NCOR1	PPI	0.555555555555556
YBX1	MAPK1	PPI	0.555555555555556
KLHL20	KLHL20	PPI	0.555555555555556
TPM2	TPM1	PPI	0.777777777777778
ESR1	SOS1	PPI	0.777777777777778
DAB2	TGFBR1	PPI	0.666666666666667
SMARCA4	ACTB	PPI	0.555555555555556
GTF2I	GTF2I	PPI	0.555555555555556
SKP1A	FBXO8	PPI	0.666666666666667
VWF	COL1A2	PPI	0.777777777777778
ZBTB16	ESR1	PPI	0.555555555555556
FCGR2B	LY6E	PPI	0.777777777777778
S100A9	S100A8	PPI	0.888888888888889
TP53	TOP2A	PPI	0.555555555555556
MEP1B	MEP1B	PPI	0.888888888888889
KPNB1	KPNB1	PPI	0.666666666666667
NCOR1	RUNX1T1	PPI	0.555555555555556
RACGAP1	CHN2	PPI	0.666666666666667
SEPT9	SEPT6	PPI	0.555555555555556
MDM4	YWHAB	PPI	0.555555555555556
JAG1	THBS1	PPI	0.777777777777778
PCBP2	PRPF40A	PPI	0.555555555555556
ENPEP	ENPEP	PPI	0.555555555555556
SLC8A1	YWHAE	PPI	0.555555555555556
PDCD2	NCOR1	PPI	0.777777777777778
TIE1	TIE1	PPI	0.555555555555556
FBN1	VCAN	PPI	0.777777777777778
TEGT	TEGT	PPI	0.666666666666667
C1S	C1S	PPI	0.666666666666667
HMMR	CD44	PPI	0.666666666666667
CDC5L	MCM4	PPI	0.555555555555556
RIT1	MLLT4	PPI	0.555555555555556
SERPINE2	COL4A1	PPI	0.888888888888889
SCAMP1	SCAMP1	PPI	0.666666666666667
YWHAZ	YWHAE	PPI	0.555555555555556
EPAS1	EP300	PPI	0.555555555555556
DAAM1	RHOA	PPI	0.555555555555556
LYST	KPNB1	PPI	0.555555555555556
IL7R	FYN	PPI	0.666666666666667
TP53	TP53	PPI	0.555555555555556
SKIL	NCOR1	PPI	0.666666666666667
EXOSC4	EXOSC4	PPI	0.777777777777778
CHI3L1	CHI3L1	PPI	0.888888888888889
GATA4	EP300	PPI	0.555555555555556
RAB11FIP3	ARF4	PPI	0.555555555555556
CDC2	LMNA	PPI	0.555555555555556
HSP90AB1	DDX24	PPI	0.555555555555556
GAPDH	ACTB	PPI	0.555555555555556
IL1RAP	IL1R1	PPI	0.555555555555556
CDH11	CTNNB1	PPI	0.777777777777778
COIL	COIL	PPI	0.555555555555556
CD47	FAS	PPI	0.555555555555556
DUSP1	MAPK14	PPI	0.555555555555556
DAZAP2	DCUN1D1	PPI	0.666666666666667
SOCS2	EPOR	PPI	0.777777777777778
PRPF40A	ATBF1	PPI	0.555555555555556
CTSB	IGF1	PPI	0.666666666666667
HLA-C	B2M	PPI	0.555555555555556
YWHAZ	TJP2	PPI	0.555555555555556
RPS6KA2	MAP2K1	PPI	0.555555555555556
MMP9	COL1A1	PPI	0.666666666666667
KPNA1	ANP32A	PPI	0.555555555555556
CUGBP1	CUGBP1	PPI	0.555555555555556
VIM	VIM	PPI	0.666666666666667
FYN	CTNNB1	PPI	0.666666666666667
ITK	ITK	PPI	0.666666666666667
SULT1E1	C14orf1	PPI	0.555555555555556
JAK1	SOCS3	PPI	0.555555555555556
HLA-F	HLA-F	PPI	0.666666666666667
CASP4	PSEN1	PPI	0.555555555555556
CTNNB1	TGFBR2	PPI	0.555555555555556
JAK1	STAT1	PPI	0.777777777777778
FOS	STAT1	PPI	0.666666666666667
MAPK1	LIFR	PPI	0.666666666666667
NUDT21	NUDT21	PPI	0.666666666666667
SF1	FUS	PPI	0.666666666666667
PDCD4	PDCD4	PPI	0.555555555555556
RAB5A	CHML	PPI	0.555555555555556
AKAP13	YWHAZ	PPI	0.555555555555556
EGFR	STAT1	PPI	0.666666666666667
STOM	STOM	PPI	0.555555555555556
BICD2	BICD2	PPI	0.555555555555556
STAT1	IFNGR1	PPI	0.888888888888889
C7	PLG	PPI	0.555555555555556
PDK4	PDK4	PPI	0.888888888888889
NSD1	ESR1	PPI	0.555555555555556
ARID2	SMARCA4	PPI	0.555555555555556
LIPC	APOB	PPI	0.666666666666667
CTSB	S100A10	PPI	0.555555555555556
NOL3	NOL3	PPI	0.555555555555556
BCL2L1	BCL2L1	PPI	0.777777777777778
RANBP9	RANBP9	PPI	0.555555555555556
GSPT1	GSPT1	PPI	0.555555555555556
CDKN2A	ANKRD12	PPI	0.666666666666667
LGALS3BP	LGALS3BP	PPI	0.555555555555556
PTPRC	PTPRC	PPI	0.777777777777778
SMARCA4	TP53	PPI	0.555555555555556
BCL6	BCL6	PPI	0.777777777777778
COL14A1	CD44	PPI	0.666666666666667
NDRG1	HNRPU	PPI	0.555555555555556
KPNB1	PTMA	PPI	0.666666666666667
MLH3	MLH3	PPI	0.555555555555556
STAT1	EP300	PPI	0.666666666666667
TFRC	TF	PPI	0.777777777777778
SFRS4	FUS	PPI	0.555555555555556
PVRL2	MLLT4	PPI	0.555555555555556
DCLRE1C	PRKDC	PPI	0.555555555555556
CD8A	HLA-C	PPI	0.555555555555556
TGFBR1	UBD	PPI	0.777777777777778
TNFAIP3	TNFAIP3	PPI	0.555555555555556
SOS1	FYN	PPI	0.666666666666667
PTPRC	ITGAL	PPI	0.555555555555556
EP300	EP300	PPI	0.666666666666667
ATXN1	EIF1AY	PPI	0.555555555555556
CASP1	EGFR	PPI	0.666666666666667
CD46	CD46	PPI	0.777777777777778
PPRC1	PPRC1	PPI	0.555555555555556
FN1	PRPF40A	PPI	0.555555555555556
PTK2	PTK2	PPI	0.777777777777778
KPNB1	FGFR1	PPI	0.555555555555556
RAB6A	CHML	PPI	0.555555555555556
PKP2	CTNNB1	PPI	0.555555555555556
HSP90AB1	ESR1	PPI	0.555555555555556
MMRN1	F5	PPI	0.777777777777778
PPP2R1B	CDC2	PPI	0.555555555555556
STAT2	IFNAR1	PPI	0.666666666666667
TFB2M	TFB2M	PPI	0.555555555555556
ERBB3	NRG1	PPI	0.555555555555556
ESR1	HSPA4	PPI	0.888888888888889
COL4A1	COL4A1	PPI	1
PKP2	PKP2	PPI	0.555555555555556
TNFRSF10A	TNFRSF10A	PPI	0.888888888888889
PON1	ALB	PPI	0.555555555555556
CHD9	PPARA	PPI	0.666666666666667
SF1	DDX17	PPI	0.777777777777778
SMC3	MXD1	PPI	0.555555555555556
FNBP4	FYN	PPI	0.666666666666667
GAPDH	RAB2A	PPI	0.555555555555556
SHC1	ESR1	PPI	0.666666666666667
ANP32A	PTPRC	PPI	0.555555555555556
BCL3	CTNNB1	PPI	0.555555555555556
ATXN1	GAPDH	PPI	0.555555555555556
TCF7L2	PSEN1	PPI	0.555555555555556
CDC42BPA	LIMK2	PPI	0.777777777777778
TGFB1I1	EP300	PPI	0.666666666666667
ID4	TCF4	PPI	0.666666666666667
AQP1	AQP1	PPI	0.555555555555556
CBL	ITCH	PPI	0.555555555555556
SHC1	MAPK1	PPI	0.555555555555556
TNS1	TNS1	PPI	0.666666666666667
SENP2	NUP153	PPI	0.555555555555556
CDC2	PTTG1	PPI	0.555555555555556
HMOX1	HMOX1	PPI	0.555555555555556
C8B	C8A	PPI	0.555555555555556
ARID1B	SMARCA2	PPI	0.555555555555556
ANAPC5	SMURF2	PPI	0.777777777777778
PTPRF	LCK	PPI	0.555555555555556
ANAPC5	TGFBR1	PPI	0.777777777777778
YWHAB	SRRM2	PPI	0.666666666666667
SKIL	SKIL	PPI	0.666666666666667
TGFB1I1	PTK2	PPI	0.555555555555556
GRK5	AVPR1A	PPI	0.666666666666667
SMARCA4	SS18	PPI	0.555555555555556
IL1B	IL1B	PPI	0.666666666666667
EXOSC6	EXOSC6	PPI	0.555555555555556
EP300	PTMA	PPI	0.666666666666667
CSNK1A1	TGFBR1	PPI	0.777777777777778
ATXN1	DAZAP2	PPI	0.555555555555556
EPOR	STAT5B	PPI	0.555555555555556
SQSTM1	LCK	PPI	0.666666666666667
SS18	SS18	PPI	0.555555555555556
RPA3	RPA3	PPI	0.666666666666667
MUC20	MET	PPI	0.666666666666667
MAP1B	STRAP	PPI	0.555555555555556
SMURF2	DAB2	PPI	0.666666666666667
CHD4	SMARCA4	PPI	0.777777777777778
SKP2	CCNA2	PPI	0.666666666666667
CDK6	CDK6	PPI	0.666666666666667
VIL2	CTNNB1	PPI	0.666666666666667
CCNB1	CDC2	PPI	0.555555555555556
SH3RF1	RACGAP1	PPI	0.555555555555556
PEX13	PEX5	PPI	0.666666666666667
SPTBN1	ATF7IP	PPI	0.555555555555556
YWHAZ	YWHAZ	PPI	0.666666666666667
PLG	APOH	PPI	0.666666666666667
IFNAR1	FBXW11	PPI	0.777777777777778
TPM2	ACTB	PPI	0.555555555555556
MAP2K1	MAP2K1	PPI	1
MEP1B	FN1	PPI	0.666666666666667
EIF4E	EIF4E	PPI	0.666666666666667
CDC2	MCM4	PPI	0.555555555555556
CXCR4	CXCR4	PPI	0.888888888888889
MAOA	MAOA	PPI	0.666666666666667
BNIP3	BNIP3	PPI	0.555555555555556
CASP8	CASP8	PPI	0.555555555555556
DGKZ	SNTB2	PPI	0.555555555555556
THBS1	MMP2	PPI	0.555555555555556
DCTD	DCTD	PPI	0.777777777777778
WASF2	ABI2	PPI	0.666666666666667
LCK	CD44	PPI	0.555555555555556
LEPR	LEPR	PPI	0.888888888888889
MTUS1	MTUS1	PPI	0.666666666666667
CAB39	PRKAA1	PPI	0.555555555555556
PRKAR1A	PRPF40A	PPI	0.555555555555556
DAB2	MYO6	PPI	0.666666666666667
CD36	ITGA6	PPI	0.666666666666667
MAPK1	MCL1	PPI	0.666666666666667
RIT1	RALGDS	PPI	0.666666666666667
KIF5B	SNAP23	PPI	0.555555555555556
RRAS2	SMAD4	PPI	0.555555555555556
FN1	CRP	PPI	0.777777777777778
CLEC4M	CLEC4M	PPI	1
HEY1	HEY1	PPI	0.666666666666667
SOCS2	GHR	PPI	0.777777777777778
MGST1	MGST1	PPI	0.777777777777778
KPNA2	LEF1	PPI	0.666666666666667
RAB8B	CDH1	PPI	0.666666666666667
PLG	ENO1	PPI	0.555555555555556
CA2	HSPD1	PPI	0.555555555555556
ARF1	DDEF1	PPI	0.666666666666667
TOB1	MARCKS	PPI	0.555555555555556
TNIK	GSN	PPI	0.555555555555556
SKIL	HIPK3	PPI	0.555555555555556
GLMN	MET	PPI	0.666666666666667
CDKN2C	CDKN2A	PPI	0.777777777777778
JAK1	JAK1	PPI	0.777777777777778
THBS1	COL1A1	PPI	0.888888888888889
CDC2	RRM2	PPI	0.555555555555556
TNPO1	TNPO1	PPI	0.777777777777778
CRADD	C14orf1	PPI	0.555555555555556
TANC1	SPTAN1	PPI	0.555555555555556
SMURF2	ARHGAP5	PPI	0.555555555555556
CRK	PTK2	PPI	0.555555555555556
BGN	COL1A2	PPI	0.555555555555556
YWHAE	VIM	PPI	0.555555555555556
SNAP23	ABI2	PPI	0.555555555555556
RUNX1T1	RUNX1T1	PPI	0.555555555555556
HBE1	HBA2	PPI	0.666666666666667
CD36	COL1A2	PPI	0.888888888888889
THBS2	MMP2	PPI	0.555555555555556
TMPRSS6	FN1	PPI	0.666666666666667
EPHA3	EPHA3	PPI	0.777777777777778
MAPK14	MAPK1	PPI	0.555555555555556
KHDRBS1	KHDRBS1	PPI	0.666666666666667
SNTB1	UTRN	PPI	0.555555555555556
FYN	SHC1	PPI	0.666666666666667
F2RL1	CBL	PPI	0.555555555555556
EPAS1	MAX	PPI	0.555555555555556
CAMK2D	STAT1	PPI	0.666666666666667
PAPOLA	YWHAE	PPI	0.555555555555556
RAP2A	RAP2A	PPI	0.666666666666667
HGF	HGF	PPI	0.666666666666667
EPHA4	FGFR2	PPI	0.666666666666667
PCBP2	QKI	PPI	0.666666666666667
SNTB2	SNTB2	PPI	0.555555555555556
EP300	PPARA	PPI	0.555555555555556
TTC3	ATF7IP	PPI	0.666666666666667
FYN	STAT1	PPI	0.777777777777778
MAPK1	EPOR	PPI	0.666666666666667
TPR	IFI16	PPI	0.666666666666667
P4HB	PRNP	PPI	0.555555555555556
ATF7IP	COL4A2	PPI	0.555555555555556
TOP1	TOP1	PPI	0.888888888888889
RASGRP1	DGKZ	PPI	0.777777777777778
MCL1	MCL1	PPI	0.777777777777778
PRKAR2B	PRKAR2B	PPI	0.666666666666667
TAPBP	TAP2	PPI	0.555555555555556
PAFAH1B1	PAFAH1B1	PPI	0.888888888888889
IL7R	STAT5B	PPI	0.555555555555556
POLR2E	POLR2E	PPI	0.555555555555556
PGGT1B	KRAS	PPI	0.666666666666667
CCND1	CALM1	PPI	0.555555555555556
TGFBR1	FKBP1A	PPI	0.555555555555556
ZBTB16	NCOR1	PPI	0.666666666666667
HSPD1	HSPD1	PPI	0.777777777777778
COL5A3	COL5A1	PPI	0.555555555555556
HBD	HBD	PPI	1
RHOA	RHOA	PPI	0.666666666666667
PLG	F2RL1	PPI	0.666666666666667
IGHM	PTK2	PPI	0.666666666666667
NBN	PRKDC	PPI	0.666666666666667
TGM2	TGM2	PPI	0.666666666666667
SQSTM1	NR2F2	PPI	0.666666666666667
GNB2L1	IFNAR1	PPI	0.666666666666667
MSN	MSN	PPI	0.777777777777778
PDCD6	HEBP2	PPI	0.555555555555556
ENAH	ENAH	PPI	0.888888888888889
SLC1A2	SLC1A2	PPI	1
CENPF	CENPF	PPI	0.555555555555556
VGLL4	TEAD1	PPI	0.555555555555556
NCOA3	DDX17	PPI	0.777777777777778
EIF4G3	EIF4E	PPI	0.555555555555556
PCSK6	PCSK6	PPI	0.888888888888889
FBXW11	FBXW11	PPI	0.777777777777778
CDK2	CDK2	PPI	0.666666666666667
TRIM23	GGA2	PPI	0.666666666666667
KHK	KHK	PPI	0.666666666666667
SOS1	SOS1	PPI	0.777777777777778
SKP1A	CCNA2	PPI	0.555555555555556
NFAT5	NFAT5	PPI	0.777777777777778
MAPK14	MEF2C	PPI	0.555555555555556
GNAS	GNAS	PPI	0.777777777777778
TPD52L1	YWHAB	PPI	0.555555555555556
LCK	LCK	PPI	0.666666666666667
ICAM1	ICAM1	PPI	0.777777777777778
HBA2	HBA2	PPI	0.888888888888889
CDKN2A	ZFP91	PPI	0.555555555555556
DCN	COL4A1	PPI	0.555555555555556
HBG2	HBG2	PPI	0.666666666666667
YWHAB	RACGAP1	PPI	0.555555555555556
DACH1	NCOR1	PPI	0.666666666666667
EPHA3	ADAM10	PPI	0.555555555555556
TXNL2	TXNL2	PPI	0.555555555555556
FBXO7	SKP1A	PPI	0.555555555555556
MCAM	FYN	PPI	0.666666666666667
CLIC4	ACTB	PPI	0.555555555555556
DLG1	MYO6	PPI	0.555555555555556
CDC42	C14orf1	PPI	0.555555555555556
SHC1	EPOR	PPI	0.777777777777778
IL7R	IL7	PPI	0.777777777777778
SFRS2IP	PSEN1	PPI	0.555555555555556
PAFAH1B1	MAP1B	PPI	0.666666666666667
CASP8	RALBP1	PPI	0.555555555555556
FAS	CALM1	PPI	0.666666666666667
MUC20	MUC20	PPI	0.777777777777778
FNTB	RAP2A	PPI	0.555555555555556
EGFR	ATP1B1	PPI	0.555555555555556
TNS1	PTK2	PPI	0.555555555555556
SOD2	SOD2	PPI	1
IGFALS	IGF1	PPI	0.888888888888889
ARL8B	TGFBR1	PPI	0.555555555555556
NUMB	AP2A1	PPI	0.555555555555556
CD47	PTK2	PPI	0.555555555555556
HABP2	COL4A1	PPI	0.666666666666667
PFN2	PFN2	PPI	0.555555555555556
MBL2	MBL2	PPI	0.555555555555556
YBX1	FUS	PPI	0.555555555555556
PGGT1B	CDC42	PPI	0.555555555555556
PTPRC	FYN	PPI	0.666666666666667
SMURF2	SF3A2	PPI	0.555555555555556
PRNP	PSMA3	PPI	0.555555555555556
PTMA	CCNB1	PPI	0.555555555555556
UTRN	UTRN	PPI	0.555555555555556
TPR	SHC1	PPI	0.666666666666667
SERPINE2	COL4A2	PPI	0.777777777777778
SMURF2	LAPTM5	PPI	0.555555555555556
BCL6	EP300	PPI	0.555555555555556
NDFIP2	NEDD4L	PPI	0.555555555555556
SEPT9	SEPT2	PPI	0.555555555555556
PTPRC	LCK	PPI	0.555555555555556
EFNB2	PSEN1	PPI	0.555555555555556
ATF7IP	SMAD4	PPI	0.555555555555556
PDCD6	SH3KBP1	PPI	0.666666666666667
CTH	CTH	PPI	0.666666666666667
GADD45B	ESR1	PPI	0.555555555555556
BAT1	BAT1	PPI	0.777777777777778
RELN	RELN	PPI	0.666666666666667
NRBF2	PPARA	PPI	0.666666666666667
HSPA4	PRSS23	PPI	0.666666666666667
PRKDC	PRKDC	PPI	0.777777777777778
PECAM1	FYN	PPI	0.777777777777778
MAPK1	SMAD4	PPI	0.555555555555556
FLAD1	FLAD1	PPI	0.555555555555556
APOH	LPA	PPI	0.555555555555556
RDX	VIL2	PPI	0.666666666666667
TCF4	EP300	PPI	0.666666666666667
GOLGA2	RAB2A	PPI	0.666666666666667
PRPF40A	SRPK2	PPI	0.555555555555556
SFRS4	SFRS2IP	PPI	0.555555555555556
IL6ST	IL6ST	PPI	0.777777777777778
NDFIP2	ITCH	PPI	0.777777777777778
GNA13	TGFBR1	PPI	0.555555555555556
AGXT2L2	AGXT2L2	PPI	0.666666666666667
GNB2L1	FYN	PPI	0.555555555555556
SMAD4	MAX	PPI	0.555555555555556
IFNGR1	IFNGR1	PPI	0.888888888888889
CTNNAL1	NEK1	PPI	0.555555555555556
PLD1	RHOA	PPI	0.666666666666667
TCF7L2	EP300	PPI	0.666666666666667
THBS1	COL5A1	PPI	0.777777777777778
NCOA2	CTNNB1	PPI	0.777777777777778
TGS1	EP300	PPI	0.555555555555556
MET	MET	PPI	0.777777777777778
CD74	HLA-DQB1	PPI	0.777777777777778
SFRS2IP	SFRS1	PPI	0.555555555555556
FAS	VIL2	PPI	0.666666666666667
MARCH5	MARCH5	PPI	0.666666666666667
PPP1R12A	RHOA	PPI	0.555555555555556
WASF2	ACTR2	PPI	0.777777777777778
NCOR1	PTMA	PPI	0.888888888888889
BICD2	RAB6A	PPI	0.555555555555556
GBP1	GBP1	PPI	0.777777777777778
CBL	YWHAB	PPI	0.666666666666667
EP300	NCOA3	PPI	0.666666666666667
F11	F11	PPI	0.888888888888889
FNTA	GBP1	PPI	0.666666666666667
VWF	VWF	PPI	0.777777777777778
CCND1	ESR1	PPI	0.555555555555556
MAPK1	KHDRBS1	PPI	0.555555555555556
MAP3K13	MAP3K13	PPI	0.777777777777778
CCL19	CCL19	PPI	0.777777777777778
B2M	B2M	PPI	0.666666666666667
CCL5	CCL5	PPI	0.777777777777778
PECAM1	LCK	PPI	0.555555555555556
SMURF2	TGFBR1	PPI	0.777777777777778
ZNF518	ATF7IP	PPI	0.555555555555556
ZHX2	ZHX2	PPI	0.888888888888889
MMP9	CD44	PPI	0.555555555555556
DPT	DCN	PPI	0.555555555555556
CDKN2A	HSP90AB1	PPI	0.555555555555556
BCOR	BCL6	PPI	0.555555555555556
C14orf32	C14orf32	PPI	0.555555555555556
EGFR	PLD1	PPI	0.666666666666667
THRSP	THRSP	PPI	0.888888888888889
EP300	DDX24	PPI	0.666666666666667
MXD1	MXD1	PPI	0.555555555555556
CDC5L	CDKN2A	PPI	0.888888888888889
NR1H4	GAPDH	PPI	0.555555555555556
TNFRSF10A	TNFSF10	PPI	0.555555555555556
TPM2	TPM2	PPI	1
CRADD	CASP8	PPI	0.555555555555556
DLAT	PDK4	PPI	0.666666666666667
MEF2C	MEF2C	PPI	0.666666666666667
SPARC	PLAT	PPI	0.666666666666667
CBL	LCK	PPI	0.555555555555556
DUSP3	MAPK1	PPI	0.555555555555556
RNF130	TGFBR1	PPI	0.555555555555556
NADK	NADK	PPI	0.555555555555556
ZBTB16	BCL6	PPI	0.555555555555556
ETS2	ETS2	PPI	0.666666666666667
SPARC	COL1A1	PPI	0.777777777777778
ATXN1	SPEN	PPI	0.555555555555556
PRKAG2	PRKAB2	PPI	0.555555555555556
CSNK1A1	CREM	PPI	0.555555555555556
CDK6	CDKN2A	PPI	0.555555555555556
CRK	STAT5B	PPI	0.555555555555556
GNB2L1	EPOR	PPI	0.666666666666667
IL8	IL8	PPI	0.888888888888889
MAFF	MAFF	PPI	0.777777777777778
HGS	EHMT2	PPI	0.555555555555556
SF1	TRIM23	PPI	0.666666666666667
PALLD	VIL2	PPI	0.555555555555556
FOS	FOS	PPI	0.666666666666667
EXOSC4	NEK1	PPI	0.555555555555556
PTK2	STAT1	PPI	0.777777777777778
TOB2	TOB2	PPI	0.777777777777778
SNAP23	SNAP23	PPI	0.666666666666667
FBXL3	SKP1A	PPI	0.555555555555556
ADRA1A	IL8RB	PPI	0.777777777777778
EZH2	WDR61	PPI	0.555555555555556
TNC	FN1	PPI	0.555555555555556
GGA2	CLINT1	PPI	0.555555555555556
COL4A2	COL4A2	PPI	0.888888888888889
FBXO9	SKP1A	PPI	0.666666666666667
SMARCA4	SMARCC1	PPI	0.777777777777778
PTPRF	INSR	PPI	0.555555555555556
TNIK	TNIK	PPI	0.777777777777778
RASSF5	STK4	PPI	0.777777777777778
S100A10	S100A10	PPI	0.666666666666667
THBS1	PLG	PPI	0.777777777777778
PTK2	SHC1	PPI	0.666666666666667
ACAT2	ACAT2	PPI	0.666666666666667
HIPK3	FAS	PPI	0.666666666666667
ZEB1	EP300	PPI	0.555555555555556
P4HB	COL1A1	PPI	0.555555555555556
SRPK2	SFRS1	PPI	0.555555555555556
TBL1X	TBL1XR1	PPI	0.888888888888889
TOB1	CNOT7	PPI	0.555555555555556
KHDRBS1	ITK	PPI	0.555555555555556
CTNNB1	CTNNA1	PPI	0.777777777777778
ILF3	FUS	PPI	0.666666666666667
ITK	FYN	PPI	0.555555555555556
PLA2G4C	PLA2G4C	PPI	0.888888888888889
CSTA	CSTA	PPI	0.666666666666667
NCOA2	MEF2C	PPI	0.666666666666667
CPN1	CPN1	PPI	0.888888888888889
ENAH	ABI2	PPI	0.555555555555556
SPARC	SPARC	PPI	0.777777777777778
GLUD1	GLUD1	PPI	0.888888888888889
ARL6IP2	ARL6IP2	PPI	0.555555555555556
CLK4	CLK4	PPI	0.555555555555556
TGFBR1	CTNNB1	PPI	0.777777777777778
SPTAN1	ACTB	PPI	0.555555555555556
INSR	CALM1	PPI	0.555555555555556
IL8RB	GNAI3	PPI	0.555555555555556
TEAD1	TEAD1	PPI	0.555555555555556
GPX2	GPX2	PPI	0.777777777777778
CASP4	SERPINB9	PPI	0.555555555555556
SH3KBP1	SH3KBP1	PPI	0.777777777777778
DPT	TGFB1	PPI	0.555555555555556
LCK	STAT1	PPI	0.666666666666667
ITLN1	ITLN1	PPI	0.666666666666667
MICAL1	VIM	PPI	0.555555555555556
EEA1	RAB5A	PPI	0.555555555555556
TMED2	ARF1	PPI	0.555555555555556
VIL2	ACTB	PPI	0.555555555555556
MAPK14	NUP153	PPI	0.555555555555556
APOA4	APOA4	PPI	0.666666666666667
HLA-B	HLA-B	PPI	0.555555555555556
EGFR	CD44	PPI	0.555555555555556
EIF4EBP2	EIF4E	PPI	0.555555555555556
ARNT	ARNT	PPI	0.555555555555556
SPAG9	SPAG9	PPI	0.777777777777778
PGGT1B	RHOB	PPI	0.555555555555556
HGD	HGD	PPI	0.888888888888889
OAT	OAT	PPI	0.888888888888889
TRIM26	TRIM26	PPI	0.666666666666667
YWHAB	SON	PPI	0.555555555555556
AGA	AGA	PPI	0.666666666666667
CTNNB1	PSEN1	PPI	0.555555555555556
RAPGEF5	RAP2A	PPI	0.555555555555556
GNA13	CTNNB1	PPI	0.555555555555556
S100A12	S100A12	PPI	1
DDEF1	SH3KBP1	PPI	0.777777777777778
PRPS1	PRPS1	PPI	0.666666666666667
GALNT1	PTPRF	PPI	0.666666666666667
SHBG	SHBG	PPI	0.555555555555556
LCK	ESR1	PPI	0.666666666666667
TPM1	ACTB	PPI	0.555555555555556
DUSP1	HSPA4	PPI	1
TFPI2	PLG	PPI	0.555555555555556
FN1	COL4A3	PPI	0.555555555555556
UBD	MAD2L1	PPI	0.555555555555556
GSTM3	GSTM3	PPI	0.666666666666667
YRDC	RBBP9	PPI	0.555555555555556
FBP1	FBP1	PPI	0.555555555555556
WASF2	CDC42	PPI	0.666666666666667
SFRS11	TOP1	PPI	0.888888888888889
PRKAB2	PRKAA1	PPI	0.555555555555556
MDM4	CSNK1A1	PPI	0.666666666666667
GHR	SHC1	PPI	0.777777777777778
ACP1	CTNNB1	PPI	0.666666666666667
SAV1	SAV1	PPI	0.555555555555556
SKIL	SPARCL1	PPI	0.555555555555556
MX1	MX1	PPI	0.666666666666667
HIPK3	LIMD1	PPI	0.555555555555556
SKP2	SKP1A	PPI	0.666666666666667
LRG1	FN1	PPI	0.666666666666667
EIF5B	CBL	PPI	0.666666666666667
SEPT2	SEPT6	PPI	0.888888888888889
ARID1B	SMARCA4	PPI	0.777777777777778
EGFR	PIK3C2A	PPI	0.555555555555556
HBA1	HBB	PPI	0.888888888888889
CASP4	CASP4	PPI	0.666666666666667
IQGAP1	CTNNB1	PPI	0.555555555555556
C20orf121	TGFBR1	PPI	0.666666666666667
ITGB2	ITGB2	PPI	0.555555555555556
NCOA3	ESR1	PPI	0.666666666666667
AKAP13	ESR1	PPI	0.666666666666667
DTNA	SNTB2	PPI	0.555555555555556
RALGDS	RAP2A	PPI	0.666666666666667
INSR	SOCS2	PPI	0.555555555555556
SREBF1	SREBF1	PPI	0.555555555555556
SHMT1	PRSS23	PPI	0.666666666666667
PCBP2	YBX1	PPI	0.555555555555556
RRAS2	SMURF2	PPI	0.555555555555556
SMARCA4	CTNNB1	PPI	0.777777777777778
NDRG1	EIF2S3	PPI	0.555555555555556
SPAG9	MAX	PPI	0.555555555555556
STAT1	GNB2L1	PPI	0.666666666666667
SMAD4	CTNNB1	PPI	0.555555555555556
SFRS1	TOP1	PPI	0.555555555555556
IL6ST	IL6R	PPI	0.555555555555556
MAP3K7IP2	BIRC4	PPI	0.555555555555556
KPNA2	KPNA2	PPI	0.666666666666667
TCF7L2	CTNNB1	PPI	0.777777777777778
COL4A1	COL4A2	PPI	0.888888888888889
NEK6	SMAD4	PPI	0.555555555555556
XRN2	COMT	PPI	0.555555555555556
NCOR1	BCL6	PPI	0.666666666666667
ARF4	EGFR	PPI	0.555555555555556
PSMA3	EGR1	PPI	0.555555555555556
EP300	SOX9	PPI	0.555555555555556
TPD52	TPD52	PPI	0.555555555555556
CD2	LCK	PPI	0.555555555555556
PPM1A	MSN	PPI	0.555555555555556
CKAP4	PLAT	PPI	0.777777777777778
PLAGL1	PLAGL1	PPI	0.666666666666667
TJP2	SH3KBP1	PPI	0.666666666666667
CDKN3	CDC2	PPI	0.555555555555556
CDK2	EP300	PPI	0.555555555555556
CLU	LEPR	PPI	0.666666666666667
FGFR1	FGFR1	PPI	0.555555555555556
EFNB2	EFNB2	PPI	0.777777777777778
EPHA4	EFNB2	PPI	0.555555555555556
CXCR4	GNA13	PPI	0.555555555555556
CCL5	PIGR	PPI	0.555555555555556
CDC42BPA	MYL9	PPI	0.666666666666667
SNX4	LEPR	PPI	0.555555555555556
NUP153	TNPO1	PPI	0.777777777777778
LCK	ITK	PPI	0.666666666666667
NEK6	SMURF2	PPI	0.555555555555556
DCN	COL1A1	PPI	0.555555555555556
TGFBR2	TGFBR2	PPI	0.555555555555556
CREM	CREM	PPI	0.555555555555556
IL8RB	CXCL6	PPI	0.666666666666667
PDCD6	FAS	PPI	0.555555555555556
CBX3	CBX3	PPI	0.777777777777778
FN1	COL4A1	PPI	0.777777777777778
PBLD	STRAP	PPI	0.666666666666667
WASL	CDC42	PPI	0.666666666666667
STAT1	DUSP3	PPI	0.555555555555556
TGFBR1	WDR61	PPI	0.555555555555556
YWHAB	LARP1	PPI	0.555555555555556
PTPRF	CTNNB1	PPI	0.666666666666667
CACYBP	S100A12	PPI	0.555555555555556
SMARCA4	STAT2	PPI	0.666666666666667
CDC42	TP53	PPI	0.555555555555556
PRC1	RACGAP1	PPI	0.666666666666667
TRIM23	GEM	PPI	0.555555555555556
FUS	FUS	PPI	0.666666666666667
RASSF5	RASSF5	PPI	0.777777777777778
GPLD1	GM2A	PPI	0.777777777777778
ZFAND5	ZFAND5	PPI	0.555555555555556
BCL2L1	CYCS	PPI	0.555555555555556
DDX24	DDX24	PPI	0.777777777777778
PRNP	APLP2	PPI	0.666666666666667
CALM1	CALM1	PPI	0.777777777777778
SOS1	EGFR	PPI	0.555555555555556
STRAP	TGFBR1	PPI	0.666666666666667
CASP1	BCL2L1	PPI	0.666666666666667
TRIB1	MAP2K1	PPI	0.777777777777778
GNAO1	GNAO1	PPI	0.555555555555556
MDH1	MDH1	PPI	0.666666666666667
CBLB	EGFR	PPI	0.666666666666667
VIM	BHLHB2	PPI	0.555555555555556
FYN	CBLB	PPI	0.666666666666667
DCUN1D1	LAPTM5	PPI	0.555555555555556
VWF	COL1A1	PPI	0.777777777777778
CD74	HLA-DPA1	PPI	0.666666666666667
CD69	CD69	PPI	0.666666666666667
P4HB	P4HB	PPI	0.555555555555556
SPEN	RBBP4	PPI	0.555555555555556
DVL3	DVL3	PPI	0.555555555555556
C19orf2	POLR2E	PPI	0.555555555555556
SMAD5	SMAD4	PPI	0.555555555555556
KCNN2	KCNN2	PPI	0.888888888888889
ESR1	DUT	PPI	0.555555555555556
KRAS	FNTA	PPI	0.777777777777778
PPP2R1B	PPP2R5C	PPI	0.777777777777778
DOCK9	CDC42	PPI	0.777777777777778
NCOA2	NCOA2	PPI	0.888888888888889
PLD1	ARF1	PPI	0.666666666666667
MARCKS	CTSB	PPI	0.666666666666667
TOX4	HIPK3	PPI	0.555555555555556
SYTL3	RAB27A	PPI	0.555555555555556
PRPF40A	SF1	PPI	0.555555555555556
CD8A	CD8A	PPI	0.555555555555556
VIM	SDCCAG3	PPI	0.666666666666667
PACSIN2	PACSIN2	PPI	0.555555555555556
SPEN	SOX9	PPI	0.777777777777778
PPP2R1B	PRDX2	PPI	0.555555555555556
CXCR4	PTK2	PPI	0.666666666666667
SPTAN1	CTNNA1	PPI	0.666666666666667
TRIM23	TRIM23	PPI	0.666666666666667
KHDRBS1	FYN	PPI	0.666666666666667
SPARC	COL1A2	PPI	0.777777777777778
FNTB	GBP1	PPI	0.666666666666667
MAPK1	PLAT	PPI	0.666666666666667
TNFSF10	TNFSF10	PPI	0.555555555555556
PDLIM5	ACTB	PPI	0.555555555555556
KLF6	TP53	PPI	0.555555555555556
HSPA4	KPNA2	PPI	0.666666666666667
TCF4	CALM1	PPI	0.555555555555556
CTNNB1	CDK6	PPI	0.555555555555556
AKAP9	PPP2R1B	PPI	0.666666666666667
THY1	THY1	PPI	0.888888888888889
CTNNB1	MET	PPI	0.777777777777778
RALGDS	RRAS2	PPI	0.555555555555556
ITCH	NUMB	PPI	0.666666666666667
GSR	GSR	PPI	0.666666666666667
FYN	FAS	PPI	0.555555555555556
B4GALT1	B4GALT1	PPI	0.666666666666667
AP2A1	RIT1	PPI	0.666666666666667
MINK1	MAP1B	PPI	0.555555555555556
STAT2	CXCR4	PPI	0.555555555555556
SFPQ	SFPQ	PPI	0.666666666666667
CSNK1A1	CTNNB1	PPI	0.777777777777778
FCN3	FCN3	PPI	1
CXCL12	CXCR4	PPI	0.555555555555556
TFPI2	F11	PPI	0.666666666666667
PLD1	ACTB	PPI	0.555555555555556
LEF1	CTNNB1	PPI	0.666666666666667
FN1	COL1A1	PPI	0.777777777777778
FNTA	RHOB	PPI	0.666666666666667
RACGAP1	RACGAP1	PPI	0.888888888888889
COL1A2	CD44	PPI	0.777777777777778
HNRPL	PCBP2	PPI	0.666666666666667
NT5E	ACTB	PPI	0.555555555555556
TMPRSS6	COL1A1	PPI	0.666666666666667
LMNA	LMNA	PPI	0.777777777777778
CBL	CBL	PPI	0.666666666666667
ATG5	ATG12	PPI	0.555555555555556
THBS2	THBS2	PPI	0.888888888888889
EXOSC4	MPZL1	PPI	0.555555555555556
ENAH	GPHN	PPI	0.666666666666667
ZNF24	ZBTB16	PPI	0.555555555555556
IL6ST	LIFR	PPI	0.777777777777778
RAB6A	TMF1	PPI	0.555555555555556
BCL11B	NR2F2	PPI	0.555555555555556
FAS	FAS	PPI	0.666666666666667
SLC16A10	RACGAP1	PPI	0.666666666666667
RAB5A	AGTR1	PPI	0.555555555555556
MAPK1	GRB10	PPI	0.666666666666667
MMP9	IL8	PPI	0.666666666666667
SOCS3	EPOR	PPI	0.555555555555556
FCN1	FCN1	PPI	0.555555555555556
CDH1	PTPRF	PPI	0.555555555555556
MMP9	COL4A2	PPI	0.555555555555556
GATM	GATM	PPI	0.666666666666667
PEX13	PEX13	PPI	0.666666666666667
MMP9	MMP9	PPI	0.666666666666667
FCN2	MASP1	PPI	0.777777777777778
RAP2A	TGFBR1	PPI	0.666666666666667
BCL6	MAPK1	PPI	0.666666666666667
SPAG9	MAPK14	PPI	0.555555555555556
CTSB	CTSB	PPI	0.777777777777778
PECAM1	PRPF40A	PPI	0.555555555555556
SURB7	TFG	PPI	0.666666666666667
EP300	ESR1	PPI	0.555555555555556
CD8A	HLA-A	PPI	0.555555555555556
CNOT7	CDK2	PPI	0.555555555555556
TF	IGFBP3	PPI	0.666666666666667
IGF2	PLG	PPI	0.555555555555556
CLEC4G	CLEC4G	PPI	1
PVRL2	PVRL2	PPI	0.666666666666667
PPP1R14A	CSNK1A1	PPI	0.666666666666667
ENAH	FAT	PPI	0.888888888888889
AURKA	NDC80	PPI	0.777777777777778
CFTR	CFTR	PPI	0.555555555555556
MCM4	MCM4	PPI	0.555555555555556
NCOR1	TBL1X	PPI	0.888888888888889
NPHP3	NPHP3	PPI	0.777777777777778
TAP2	TAP1	PPI	0.666666666666667
SOX9	KPNB1	PPI	0.555555555555556
RRM1	RRM1	PPI	0.666666666666667
DDX39	BAT1	PPI	0.555555555555556
SQSTM1	GABARAPL1	PPI	0.666666666666667
COL1A2	SHBG	PPI	0.555555555555556
PVRL3	PVRL2	PPI	0.555555555555556
FEZ1	FEZ1	PPI	0.666666666666667
TAPBP	HLA-A	PPI	0.555555555555556
HGF	LCN2	PPI	0.555555555555556
CGN	TJP2	PPI	0.555555555555556
ESR1	PIK3R3	PPI	0.666666666666667
NCOA3	CCND1	PPI	0.555555555555556
EBF1	EBF1	PPI	0.777777777777778
MINA	MINA	PPI	0.666666666666667
XRN2	EIF5A	PPI	0.555555555555556
PTPRF	PTPRF	PPI	0.666666666666667
CBL	DDEF1	PPI	0.666666666666667
EFNB2	EPHA3	PPI	0.666666666666667
KPNB1	CSNK1A1	PPI	0.666666666666667
PPFIBP1	PPFIBP1	PPI	0.888888888888889
COL5A3	COL1A2	PPI	0.666666666666667
IL8RB	IL8RB	PPI	0.888888888888889
GNAI3	GNAI3	PPI	0.555555555555556
GSTM2	GSTM2	PPI	0.666666666666667
EGFR	FAS	PPI	0.555555555555556
EGFR	GAPDH	PPI	0.555555555555556
CBL	MET	PPI	0.666666666666667
ATXN3	CASP1	PPI	0.555555555555556
CD44	CD44	PPI	0.777777777777778
PTK2	ATG12	PPI	0.666666666666667
MAD2L2	MAD2L2	PPI	0.555555555555556
CDK2	COIL	PPI	0.555555555555556
SPP1	CD44	PPI	0.777777777777778
PTGS2	PTGS2	PPI	0.777777777777778
SMURF2	TFPI2	PPI	0.555555555555556
ANGPT1	ANGPT1	PPI	0.888888888888889
YWHAB	BCL2L11	PPI	0.555555555555556
RUNX1T1	TCF4	PPI	0.555555555555556
CBLB	SH3KBP1	PPI	0.777777777777778
TOB1	SMAD5	PPI	0.555555555555556
SH3RF1	MAP3K11	PPI	0.555555555555556
KPNA1	STAT1	PPI	0.666666666666667
KPNA2	PTMA	PPI	0.555555555555556
DDX3Y	SHBG	PPI	0.555555555555556
CDKN2A	CDKN2A	PPI	0.888888888888889
ALAD	ALAD	PPI	0.555555555555556
MMP2	COL1A1	PPI	0.555555555555556
GNB2L1	JAK1	PPI	0.666666666666667
MEF2C	EP300	PPI	0.555555555555556
MDM4	ARF1	PPI	0.555555555555556
CDH1	VIL2	PPI	0.666666666666667
SEPT11	SEPT9	PPI	0.555555555555556
CDKN3	CDKN3	PPI	0.666666666666667
C7	CLU	PPI	0.555555555555556
NCOR1	NCOR1	PPI	0.888888888888889
MKNK1	MKNK1	PPI	0.555555555555556
CIDEB	CIDEB	PPI	0.888888888888889
SLC8A1	YWHAB	PPI	0.555555555555556
SHC1	CBL	PPI	0.555555555555556
HIPK3	LIMK2	PPI	0.555555555555556
STAT1	CXCR4	PPI	0.888888888888889
PTPRC	JAK1	PPI	0.777777777777778
MDM4	YWHAE	PPI	0.555555555555556
CRKL	IFNAR1	PPI	0.555555555555556
RDH5	RDH5	PPI	0.666666666666667
FN1	MMP9	PPI	0.555555555555556
ACP1	SPTAN1	PPI	0.666666666666667
STAT1	STAT5B	PPI	0.555555555555556
ZBTB7A	ZBTB7A	PPI	0.666666666666667
MAPK1	ESR1	PPI	0.555555555555556
IGFBP3	COL1A1	PPI	0.888888888888889
SMURF2	SMAD5	PPI	0.666666666666667
SCARB2	THBS1	PPI	0.555555555555556
TMED2	COPA	PPI	0.666666666666667
COPS8	COPS8	PPI	0.555555555555556
GOSR2	ARF1	PPI	0.555555555555556
TGM2	ACTB	PPI	0.555555555555556
NR5A2	ALB	PPI	0.666666666666667
SYT9	SYT9	PPI	0.555555555555556
CCNA2	CDK2	PPI	0.555555555555556
PGK1	GAPDH	PPI	0.555555555555556
GATA4	FOS	PPI	0.555555555555556
DAZAP2	DAZAP2	PPI	0.666666666666667
SPARC	FN1	PPI	0.666666666666667
VTI1A	STX16	PPI	0.555555555555556
NCOA2	KIF5B	PPI	0.555555555555556
EGFR	MET	PPI	0.555555555555556
NBN	H2AFX	PPI	0.555555555555556
C10orf18	C10orf18	PPI	0.666666666666667
CHD4	ATR	PPI	0.555555555555556
COL6A2	ABCD3	PPI	0.666666666666667
ANGPTL1	ANGPTL1	PPI	0.666666666666667
GEM	YWHAB	PPI	0.555555555555556
INSR	INSR	PPI	0.666666666666667
ASCL1	ASCL1	PPI	0.777777777777778
BCL2L1	PSEN1	PPI	0.555555555555556
HSP90AB1	WASL	PPI	0.555555555555556
CNDP1	CNDP1	PPI	1
PCSK5	ITGA6	PPI	0.555555555555556
CBLB	SHC1	PPI	0.666666666666667
H2AFX	H2AFX	PPI	0.777777777777778
PRSS23	NIPBL	PPI	0.666666666666667
PTPRC	INSR	PPI	0.555555555555556
EGFR	EGFR	PPI	0.666666666666667
IGFALS	PDCD6	PPI	0.666666666666667
ATXN1	ZC3H7B	PPI	0.555555555555556
NEK2	NEK2	PPI	0.666666666666667
CPSF1	CPSF1	PPI	0.555555555555556
DLG1	DLG1	PPI	0.555555555555556
ESR1	MLL2	PPI	0.777777777777778
SNAP23	VAMP3	PPI	0.666666666666667
NDC80	ZWINT	PPI	0.777777777777778
ARF1	ARF1	PPI	0.666666666666667
RALGDS	KRAS	PPI	0.777777777777778
NCOR1	PPARA	PPI	0.666666666666667
PLXNA1	PLXNA1	PPI	0.555555555555556
MAPK1	MAPK1	PPI	0.666666666666667
TAP1	ESR1	PPI	0.777777777777778
GNA13	RDX	PPI	0.555555555555556
TNFRSF10D	TNFRSF10D	PPI	0.555555555555556
ATG5	ATG5	PPI	0.666666666666667
GRB10	INSR	PPI	0.555555555555556
CHD9	ESR1	PPI	0.666666666666667
PSMD7	RAB1A	PPI	0.555555555555556
GTF2I	STAT1	PPI	0.555555555555556
TCF4	TCF4	PPI	0.666666666666667
RBM7	SFRS3	PPI	0.777777777777778
VGLL4	MEF2C	PPI	0.666666666666667
BPTF	MAZ	PPI	0.555555555555556
NR1H4	ESR1	PPI	0.666666666666667
ITK	TGFBR1	PPI	0.555555555555556
CFLAR	BCL2L1	PPI	0.555555555555556
EPHA4	EPHA4	PPI	0.666666666666667
MCL1	DAD1	PPI	0.555555555555556
STAT2	STAT1	PPI	0.666666666666667
IFNAR1	LCK	PPI	0.555555555555556
LUM	COL1A2	PPI	0.888888888888889
THBS1	COL3A1	PPI	0.777777777777778
HMMR	CALM1	PPI	0.666666666666667
STAT5B	GHR	PPI	0.555555555555556
SFRS4	SMURF2	PPI	0.555555555555556
TERF1	TERF1	PPI	0.666666666666667
MAPK1	IFNAR1	PPI	0.666666666666667
VCAN	VCAN	PPI	0.777777777777778
ATXN1	NCOR1	PPI	0.555555555555556
PCBD1	PCBD1	PPI	0.555555555555556
NCOA3	NCOA3	PPI	0.777777777777778
PTK2	TP53	PPI	0.555555555555556
SEPT2	DAZAP2	PPI	0.666666666666667
HOMER1	HOMER1	PPI	0.888888888888889
PEA15	PLD1	PPI	0.555555555555556
GNAS	GCGR	PPI	0.555555555555556
GSTZ1	GSTZ1	PPI	0.888888888888889
PRPF40A	WASL	PPI	0.555555555555556
EIF5	EIF1AY	PPI	0.666666666666667
CDC2	HMGA1	PPI	0.555555555555556
JAK1	STAT2	PPI	0.666666666666667
ATR	RHEB	PPI	0.777777777777778
KLF6	EHMT2	PPI	0.555555555555556
CD74	HLA-DQA1	PPI	0.777777777777778
BIRC4	TGFBR1	PPI	0.555555555555556
YME1L1	PSEN1	PPI	0.555555555555556
PLAT	PLG	PPI	0.666666666666667
GSTM1	GSTM1	PPI	0.888888888888889
FCGR2B	CRP	PPI	0.777777777777778
CCL21	VCAN	PPI	0.555555555555556
GPLD1	APOA4	PPI	0.666666666666667
ATXN1	KLF11	PPI	0.555555555555556
SHC1	MET	PPI	0.666666666666667
IL1RAP	PRPF40A	PPI	0.666666666666667
GATA4	MEF2C	PPI	0.555555555555556
PTK2	FYN	PPI	0.666666666666667
CHN2	TGFBR1	PPI	0.777777777777778
POLR2E	TAF15	PPI	0.555555555555556
SOCS6	TGFBR1	PPI	0.555555555555556
FNBP4	PRPF40A	PPI	0.555555555555556
CADM1	ATF7IP	PPI	0.555555555555556
KLF6	PNO1	PPI	0.555555555555556
UBE2G1	UBE2G1	PPI	0.555555555555556
AP2A1	GHR	PPI	0.666666666666667
CBFA2T2	NCOR1	PPI	0.777777777777778
RRAGC	RRAGC	PPI	0.555555555555556
GDI2	RAB2A	PPI	0.666666666666667
TAP2	HLA-C	PPI	0.666666666666667
IL6ST	ERBB3	PPI	0.555555555555556
S100A8	S100A8	PPI	0.888888888888889
TGM2	FN1	PPI	0.666666666666667
MS4A1	LCK	PPI	0.555555555555556
IFNAR1	PTPRC	PPI	0.777777777777778
GOLGA2	RAB1A	PPI	0.555555555555556
PLA2G2A	DCN	PPI	0.555555555555556
YWHAB	OSBPL3	PPI	0.666666666666667
SPARC	HSPG2	PPI	0.555555555555556
ABCD3	ABCD3	PPI	0.666666666666667
PRKD2	TGOLN2	PPI	0.555555555555556
YWHAZ	TP53	PPI	0.555555555555556
MAP2K1	MAPK14	PPI	0.555555555555556
MED25	MED6	PPI	0.555555555555556
TP53	ESR1	PPI	0.555555555555556
EFNB2	PECAM1	PPI	0.777777777777778
FGF13	FGF13	PPI	0.555555555555556
EEA1	EEA1	PPI	0.666666666666667
CITED2	EP300	PPI	0.555555555555556
TBL1X	CTNNB1	PPI	0.888888888888889
PPP2R1B	HSPD1	PPI	0.777777777777778
CD47	THBS1	PPI	0.555555555555556
FAS	MET	PPI	0.666666666666667
CXCL10	CXCL10	PPI	0.555555555555556
DBH	DBH	PPI	0.666666666666667
ATF6	ATF6	PPI	0.666666666666667
TMPRSS2	TMPRSS2	PPI	0.555555555555556
SERPINE1	SERPINE1	PPI	0.666666666666667
LCN2	LCN2	PPI	0.777777777777778
TNFRSF10A	CASP8	PPI	0.555555555555556
ZBTB7A	BCL6	PPI	0.555555555555556
SPTAN1	DDX24	PPI	0.777777777777778
DCN	COL14A1	PPI	0.555555555555556
ACP1	INSR	PPI	0.555555555555556
KHDRBS1	LCK	PPI	0.555555555555556
CTNNA1	CDH1	PPI	0.777777777777778
PLD1	CDC42	PPI	0.777777777777778
HLA-A	HLA-A	PPI	0.666666666666667
MAP2	MAP2	PPI	0.888888888888889
GRB10	GHR	PPI	0.888888888888889
PSMB7	PSMB7	PPI	0.666666666666667
THY1	LCK	PPI	0.555555555555556
PTK2	EGFR	PPI	0.555555555555556
PPP2R1B	CFTR	PPI	0.555555555555556
STAT1	MAPK14	PPI	0.555555555555556
ADSSL1	ADSSL1	PPI	0.555555555555556
RHOA	TGFBR1	PPI	0.666666666666667
B2M	PRSS23	PPI	0.555555555555556
NEK6	TGFBR1	PPI	0.555555555555556
EGFR	VIL2	PPI	0.555555555555556
PRPF4B	SFRS1	PPI	0.555555555555556
DCN	COL1A2	PPI	0.555555555555556
EIF5A	TGM2	PPI	0.666666666666667
TEGT	BCL2L1	PPI	0.555555555555556
MSN	VIL2	PPI	0.555555555555556
TAPBP	HLA-C	PPI	0.666666666666667
MARCH5	MFN2	PPI	0.666666666666667
GAPDH	GAPDH	PPI	0.555555555555556
ASS1	ASS1	PPI	0.555555555555556
PRNP	PLG	PPI	0.666666666666667
HBB	HBB	PPI	0.888888888888889
COL1A1	CD44	PPI	0.777777777777778
CTNNAL1	AKAP13	PPI	0.555555555555556
CADM1	CADM1	PPI	0.666666666666667
PDGFA	HSPG2	PPI	0.555555555555556
GGA2	GGA2	PPI	0.666666666666667
AHSG	DCN	PPI	0.555555555555556
MAPK8IP3	MAPK8IP3	PPI	0.555555555555556
CPM	HBA2	PPI	0.555555555555556
ESR1	CTNNB1	PPI	0.777777777777778
MMP2	PZP	PPI	0.555555555555556
CDH1	EGFR	PPI	0.555555555555556
CDKN2C	CDK6	PPI	0.666666666666667
PDGFRA	PDGFRA	PPI	0.555555555555556
FNTB	FNTA	PPI	0.666666666666667
ESR1	CALM1	PPI	0.666666666666667
APLP2	APLP2	PPI	0.777777777777778
ATR	TP53	PPI	0.555555555555556
FN1	COL4A2	PPI	0.666666666666667
EGFR	CTNNB1	PPI	0.666666666666667
CDC2	CDC2	PPI	0.555555555555556
SYTL4	SYTL4	PPI	0.666666666666667
PTPRC	VIL2	PPI	0.666666666666667
SMARCA4	ESR1	PPI	0.777777777777778
TOB2	CNOT7	PPI	0.666666666666667
ITCH	ITCH	PPI	0.777777777777778
SKP1A	SKP1A	PPI	0.666666666666667
PDIA3	TAP1	PPI	0.555555555555556
GLUD2	GLUD2	PPI	1
PRNP	HSPD1	PPI	0.666666666666667
ANK3	FAS	PPI	0.555555555555556
HSD17B14	HSD17B14	PPI	1
RAB27A	ZBTB16	PPI	0.555555555555556
ASPA	ASPA	PPI	0.555555555555556
MARCH5	UTRN	PPI	0.555555555555556
PLG	PLG	PPI	0.777777777777778
PPP2R5C	EP300	PPI	0.555555555555556
EPB41L2	SPTAN1	PPI	0.666666666666667
VCAN	CD44	PPI	0.555555555555556
CAPN2	F2RL1	PPI	0.555555555555556
CASP8	CTNNB1	PPI	0.555555555555556
NR1H4	CASP8	PPI	0.555555555555556
GLUL	GLUL	PPI	0.666666666666667
GPC3	IGF2	PPI	0.555555555555556
SPTAN1	SPTBN1	PPI	0.666666666666667
AZGP1	AZGP1	PPI	0.555555555555556
PLAT	SERPINE1	PPI	0.555555555555556
BCHE	BCHE	PPI	0.777777777777778
CETP	CETP	PPI	1
TPD52L1	YWHAZ	PPI	0.555555555555556
CD36	COL1A1	PPI	0.888888888888889
IL8RB	CXCL2	PPI	0.555555555555556
AP1S1	AP1S1	PPI	0.555555555555556
BCL2L10	BCL2L1	PPI	0.555555555555556
ARF1	ARHGAP21	PPI	0.555555555555556
EP300	NCOA2	PPI	0.666666666666667
LYST	YWHAB	PPI	0.555555555555556
ACLY	ACLY	PPI	0.555555555555556
SULT2A1	SULT2A1	PPI	0.666666666666667
BIRC4	BIRC4	PPI	0.666666666666667
MLLT10	MLLT10	PPI	0.888888888888889
GNB2L1	GNB2L1	PPI	0.666666666666667
DDEF1	PTK2	PPI	0.777777777777778
KLRK1	KLRK1	PPI	0.666666666666667
ETS2	SMARCA4	PPI	0.555555555555556
SYNC1	DTNA	PPI	0.777777777777778
FDX1	FDX1	PPI	0.555555555555556
TAPBP	TAP1	PPI	0.666666666666667
MAPK1	TOB1	PPI	0.555555555555556
EPOR	CBL	PPI	0.666666666666667
FEZ1	OLFML3	PPI	0.555555555555556
VIM	SERBP1	PPI	0.666666666666667
DGKZ	SNTB1	PPI	0.666666666666667
HLA-DMA	CD74	PPI	0.555555555555556
TFRC	TFRC	PPI	0.777777777777778
SFPQ	PSPC1	PPI	0.555555555555556
XRN2	PSMA3	PPI	0.555555555555556
ACTB	ACTB	PPI	0.555555555555556
SMAD4	SMAD4	PPI	0.555555555555556
ASCL1	EP300	PPI	0.555555555555556
ZNF24	C14orf1	PPI	0.555555555555556
PTK2	SOCS2	PPI	0.666666666666667
NEK2	NDC80	PPI	0.666666666666667
AKAP13	YWHAE	PPI	0.666666666666667
SERPINE1	PLG	PPI	0.666666666666667
GGA2	ARF1	PPI	0.555555555555556
XPO7	NUP153	PPI	0.666666666666667
RFWD2	RFWD2	PPI	0.555555555555556
TMED2	GOLGA2	PPI	0.777777777777778
CTSC	CTSC	PPI	0.666666666666667
TAF15	SF1	PPI	0.777777777777778
ATXN1	C17orf81	PPI	0.555555555555556
ABI2	SH3KBP1	PPI	0.666666666666667
PTMA	CCNA2	PPI	0.777777777777778
TCERG1	SF1	PPI	0.555555555555556
CTNNB1	PPM1A	PPI	0.666666666666667
RGS5	GNAI3	PPI	0.555555555555556
XRCC5	XRCC5	PPI	0.666666666666667
PRKDC	LIG4	PPI	0.666666666666667
YWHAB	YWHAB	PPI	0.666666666666667
ATF7IP	RRBP1	PPI	0.555555555555556
HNRPL	HNRPL	PPI	0.666666666666667
ITPKB	CALM1	PPI	0.666666666666667
FAS	C14orf1	PPI	0.555555555555556
KLF11	MAPK1	PPI	0.666666666666667
PRKAR1A	EGFR	PPI	0.555555555555556
RECQL	RECQL	PPI	0.666666666666667
INSR	JAK1	PPI	0.555555555555556
LIMK2	GSN	PPI	0.666666666666667
SYNJ2	SYNJ2	PPI	0.555555555555556
YWHAB	SFRS3	PPI	0.666666666666667
E2F3	CCNA2	PPI	0.666666666666667
HIPK3	TGFB1I1	PPI	0.666666666666667
HBB	HBA2	PPI	0.888888888888889
THBS1	CD36	PPI	0.777777777777778
NCOA2	ESR1	PPI	0.777777777777778
TKT	TKT	PPI	0.555555555555556
FN1	SMAD4	PPI	0.555555555555556
CDH1	CDH1	PPI	0.777777777777778
GNMT	GNMT	PPI	0.666666666666667
TGFA	TGFA	PPI	0.666666666666667
TAP1	HLA-F	PPI	0.666666666666667
PRPF40A	ENAH	PPI	0.555555555555556
CTSA	CTSA	PPI	0.555555555555556
AURKA	AURKA	PPI	0.888888888888889
PDCD6	PDCD6	PPI	0.666666666666667
PSPH	PSPH	PPI	1
INHBE	INHBE	PPI	0.666666666666667
MCL1	BCL2L11	PPI	0.555555555555556
HBG2	HBB	PPI	0.666666666666667
FBN1	HSPG2	PPI	0.555555555555556
RGS5	GNAO1	PPI	0.555555555555556
MDK	MDK	PPI	0.555555555555556
RAPGEF2	CTNNB1	PPI	0.666666666666667
IQGAP1	CLIP1	PPI	0.555555555555556
THY1	FYN	PPI	0.666666666666667
BGN	COL1A1	PPI	0.555555555555556
NT5E	FN1	PPI	0.555555555555556
PDE1A	CALM1	PPI	0.555555555555556
HGS	MET	PPI	0.555555555555556
KCNN2	CALM1	PPI	0.666666666666667
CUL5	TGFBR1	PPI	0.555555555555556
PDGFRA	STAT1	PPI	0.555555555555556
MDM4	YWHAZ	PPI	0.555555555555556
MAP2K1	EP300	PPI	0.666666666666667
NCOA2	DDX17	PPI	0.777777777777778
TNFRSF10A	TNFRSF10B	PPI	0.555555555555556
NBN	XRCC5	PPI	0.555555555555556
PHLDA1	HSPA4	PPI	0.777777777777778
BCL2L10	BCL2L10	PPI	0.666666666666667
TJP2	CTNNA1	PPI	0.777777777777778
SPARC	COL3A1	PPI	0.666666666666667
LYST	CALM1	PPI	0.666666666666667
MAPK1	MAP2K1	PPI	0.666666666666667
MAP2	ACTB	PPI	0.555555555555556
CARD8	CARD8	PPI	0.555555555555556
MSN	ICAM1	PPI	0.555555555555556
FYN	ACP1	PPI	0.555555555555556
GCHFR	GCHFR	PPI	0.777777777777778
STAT1	STAT1	PPI	1
NCOR1	ESR1	PPI	0.777777777777778
INSR	IGF2	PPI	0.555555555555556
FYN	GRB10	PPI	0.777777777777778
CSNK1A1	ACTB	PPI	0.555555555555556
PRKD2	PRKD2	PPI	0.777777777777778
TEAD1	MEF2C	PPI	0.555555555555556
ZMYM2	SFPQ	PPI	0.555555555555556
PTS	PTS	PPI	0.555555555555556
SMURF2	SKIL	PPI	0.555555555555556
JAK1	IFNGR1	PPI	0.777777777777778
KPNB1	IGFBP3	PPI	0.555555555555556
CDK2	PRKAR1A	PPI	0.666666666666667
CCND1	CTNNB1	PPI	0.666666666666667
VIL2	VIL2	PPI	0.666666666666667
EPOR	EPOR	PPI	1
TRAF5	TRAF5	PPI	0.888888888888889
YWHAB	YWHAE	PPI	0.555555555555556
BACE2	BACE2	PPI	0.555555555555556
TGFBR1	FNTA	PPI	0.777777777777778
ABAT	ABAT	PPI	0.666666666666667
RAB14	SMURF2	PPI	0.555555555555556
ESR1	EGFR	PPI	0.555555555555556
ANTXR1	BCL2L1	PPI	0.666666666666667
SEPT7	SEPT11	PPI	0.666666666666667
IGFALS	IGFBP3	PPI	0.888888888888889
CASP1	CASP1	PPI	0.666666666666667
MMP9	COL1A2	PPI	0.666666666666667
SMURF2	SOCS6	PPI	0.555555555555556
ERBB3	ERBB3	PPI	0.666666666666667
YBX1	YBX1	PPI	0.555555555555556
TGFBR1	CLU	PPI	0.666666666666667
IGF2	IGFBP3	PPI	0.555555555555556
MLLT10	SS18	PPI	0.555555555555556
ETS1	ETS1	PPI	0.555555555555556
PTK2	ERBB3	PPI	0.555555555555556
PSAP	PSAP	PPI	0.555555555555556
PZP	TGFB1	PPI	0.555555555555556
EFNB2	HOMER1	PPI	0.666666666666667
SFPQ	FUS	PPI	0.666666666666667
ST6GAL1	ST6GAL1	PPI	0.888888888888889
PSME3	PSME3	PPI	0.555555555555556
ARID1B	ARID1B	PPI	0.777777777777778
SQSTM1	GRIA3	PPI	0.666666666666667
ALDOB	ALDOB	PPI	0.555555555555556
EGR1	CDKN2A	PPI	0.555555555555556
RAB8B	VIM	PPI	0.555555555555556
LCK	ACP1	PPI	0.555555555555556
PSEN1	PSEN1	PPI	0.555555555555556
CCT2	ACTB	PPI	0.555555555555556
FKBP1A	FKBP1A	PPI	0.555555555555556
PRPF4B	KLF13	PPI	0.777777777777778
ACTB	CFL2	PPI	0.555555555555556
GOPC	GOPC	PPI	0.555555555555556
S100A8	C14orf1	PPI	0.555555555555556
SIRT2	CDC14B	PPI	0.555555555555556
RPS6KA2	RPS6KA2	PPI	0.555555555555556
CTNNA1	PSEN1	PPI	0.555555555555556
PLA2G2A	PLA2G2A	PPI	1
GSTM2	GSTM1	PPI	0.666666666666667
CAT	CAT	PPI	0.666666666666667
WASF2	ACTB	PPI	0.555555555555556
FMNL2	PRPF40A	PPI	0.555555555555556
MMP9	COL4A1	PPI	0.666666666666667
JAG1	NOTCH3	PPI	0.666666666666667
THBS1	TFPI	PPI	0.555555555555556
PDGFA	PDGFA	PPI	0.777777777777778
ATP6V1A	ATP6V1A	PPI	0.555555555555556
DUT	DUT	PPI	0.666666666666667
CDC2	TOP2A	PPI	0.555555555555556
MAX	MAX	PPI	0.555555555555556
C8B	CLU	PPI	0.555555555555556
NFIC	NFIB	PPI	0.666666666666667
MDM4	EP300	PPI	0.555555555555556
EPHA4	FYN	PPI	0.666666666666667
NUP153	KPNB1	PPI	0.666666666666667
TIMP3	MMP9	PPI	0.555555555555556
MAD2L1	MAD2L1	PPI	0.555555555555556
JAK1	CXCR4	PPI	0.666666666666667
SKP2	CDK2	PPI	0.666666666666667
PTMA	CDK2	PPI	0.666666666666667
YWHAE	ATXN1	PPI	0.555555555555556
IGFBP7	CCL21	PPI	0.555555555555556
IL7R	JAK1	PPI	0.777777777777778
XRCC5	PRKDC	PPI	0.555555555555556
SFRS11	SFRS1	PPI	0.555555555555556
MAPK1	NCOA3	PPI	0.555555555555556
TGFBR1	TGFBR1	PPI	0.777777777777778
KRAS	FNTB	PPI	0.666666666666667
EIF2C2	DICER1	PPI	0.555555555555556
CAMK2D	CAMK2D	PPI	0.666666666666667
F11	HGF	PPI	0.555555555555556
COL12A1	COL12A1	PPI	0.555555555555556
CD74	CD44	PPI	0.666666666666667
PCBP2	PCBP2	PPI	0.777777777777778
TCF4	XRCC5	PPI	0.555555555555556
NFASC	NFASC	PPI	0.555555555555556
NR2F2	EP300	PPI	0.555555555555556
SLC12A2	SLC12A2	PPI	0.555555555555556
S100A6	S100A6	PPI	0.555555555555556
SCRIB	TJP2	PPI	0.555555555555556
CSNK1A1	YWHAZ	PPI	0.555555555555556
TFG	TFG	PPI	0.666666666666667
HRB	HRB	PPI	0.666666666666667
YWHAE	TOP2A	PPI	0.666666666666667
GDI2	RAB5A	PPI	0.666666666666667
MAPKAPK2	MAPKAPK2	PPI	0.555555555555556
IGFBP3	PLG	PPI	0.666666666666667
MCL1	BCL2L1	PPI	0.555555555555556
P4HB	COL1A2	PPI	0.555555555555556
IGFBP3	FN1	PPI	0.666666666666667
KHDRBS1	CBL	PPI	0.666666666666667
TACC1	AURKA	PPI	0.555555555555556
TCF4	CTNNB1	PPI	0.666666666666667
ZBTB16	ZBTB16	PPI	0.666666666666667
MDH1	GPD1	PPI	0.666666666666667
FN1	SKIL	PPI	0.555555555555556
CCL5	VCAN	PPI	0.666666666666667
CD36	FYN	PPI	0.666666666666667
MLLT4	CTNNA1	PPI	0.555555555555556
FAT	HOMER1	PPI	0.888888888888889
ATXN3	PSMD7	PPI	0.555555555555556
ICAM1	VIL2	PPI	0.555555555555556
AKAP13	PPARA	PPI	0.666666666666667
HTRA1	COL1A1	PPI	0.555555555555556
FEZ1	SMC3	PPI	0.555555555555556
ATXN1	ATXN1	PPI	0.555555555555556
RALBP1	CCNB1	PPI	0.555555555555556
IGF1	IGFBP3	PPI	0.777777777777778
MET	SPSB1	PPI	0.777777777777778
CXCL2	CXCL2	PPI	0.555555555555556
FOXP1	FOXP1	PPI	0.666666666666667
HBA1	PTEN	PPI	0.555555555555556
SOX13	SOX13	PPI	0.777777777777778
EGFR	MAP2K1	PPI	0.666666666666667
AKAP13	YWHAB	PPI	0.666666666666667
ITGAL	ITGAL	PPI	0.666666666666667
AKAP13	RHOA	PPI	0.666666666666667
DLD	DLD	PPI	0.666666666666667
NUP153	NUP153	PPI	0.777777777777778
CLIC4	YWHAZ	PPI	0.555555555555556
THBS1	FN1	PPI	0.777777777777778
SMAD4	TGFBR1	PPI	0.555555555555556
IL8	IL8RB	PPI	0.777777777777778
FYN	MAP2	PPI	0.777777777777778
PLD1	PLD1	PPI	1
SFPQ	TOP1	PPI	0.666666666666667
TGM2	RHOA	PPI	0.666666666666667
ITGAL	ICAM1	PPI	0.555555555555556
SOX6	SOX6	PPI	0.666666666666667
RUNX2	EP300	PPI	0.555555555555556
MAPK1	FCGR2B	PPI	0.555555555555556
SKIL	COL4A2	PPI	0.666666666666667
FNBP4	KHDRBS1	PPI	0.666666666666667
IGHD	IGHD	PPI	0.555555555555556
HABP2	COL4A2	PPI	0.555555555555556
PPP2R1B	RAB18	PPI	0.666666666666667
TGFB1	TGFB1	PPI	0.555555555555556
MAP3K11	MAP3K11	PPI	0.555555555555556
THBS2	MMP9	PPI	0.666666666666667
ATP5G3	ATP5G3	PPI	0.777777777777778
SQSTM1	TGFBR1	PPI	0.777777777777778
GZMA	GZMA	PPI	0.555555555555556
TCF4	ASCL1	PPI	0.555555555555556
CDC42BPA	CDC42BPA	PPI	1
HIBADH	HIBADH	PPI	0.777777777777778
AKT2	ESR1	PPI	0.666666666666667
PTP4A1	PTP4A1	PPI	0.555555555555556
CALD1	CALM1	PPI	0.666666666666667
ITK	CBL	PPI	0.555555555555556
BCL2L11	BCL2L11	PPI	0.555555555555556
FOXO1	G6PC	TRI	0.555555555555556
TCF4	IL8	TRI	0.555555555555556
NR2F2	APOB	TRI	0.666666666666667
NR5A2	CETP	TRI	0.666666666666667
STAT1	FOS	TRI	0.666666666666667
BHLHB2	BHLHB2	TRI	0.777777777777778
KLF13	HBG1	TRI	0.666666666666667
ATF3	ATF3	TRI	0.777777777777778
NFIC	APOB	TRI	0.666666666666667
STAT1	VIM	TRI	0.666666666666667
ETS2	CDC2	TRI	0.555555555555556
BCL6	PDCD2	TRI	0.555555555555556
TP53	TP53	TRI	0.555555555555556
FOS	HBA1	TRI	0.666666666666667
NFIC	FN1	TRI	0.666666666666667
EGR1	PDGFA	TRI	0.555555555555556
SOX4	CD2	TRI	0.555555555555556
CEBPD	APOB	TRI	0.555555555555556
STAT1	ICAM1	TRI	0.777777777777778
NR5A2	ALB	TRI	0.666666666666667
NFIC	HBA1	TRI	0.555555555555556
STAT1	CCND1	TRI	0.666666666666667
NR2F2	CETP	TRI	0.666666666666667
ESR1	TF	TRI	0.666666666666667
CEBPD	CRP	TRI	0.555555555555556
STAT1	CYBB	TRI	0.666666666666667
CREM	CYP51A1	TRI	0.555555555555556
ESR1	TGFA	TRI	0.666666666666667
TP53	CPN1	TRI	0.555555555555556
FLI1	COL1A2	TRI	0.555555555555556
EGR1	PECAM1	TRI	0.666666666666667
KLF13	CYP1A1	TRI	0.555555555555556
TP53	CAMK2D	TRI	0.555555555555556
NFIC	TF	TRI	0.666666666666667
EGR1	EGFR	TRI	0.555555555555556
STAT1	ISG15	TRI	0.555555555555556
TP53	FRMD4A	TRI	0.555555555555556
ESR1	FOS	TRI	0.555555555555556
TP53	DUSP1	TRI	0.555555555555556
KLF6	TGFBR1	TRI	0.777777777777778
PPARA	DBI	TRI	0.555555555555556
FOS	SERPINE1	TRI	0.555555555555556
ESR1	PTMA	TRI	0.777777777777778
BCL6	BCL2L1	TRI	0.666666666666667
TCF7L2	CCND1	TRI	0.555555555555556
CREM	PLAT	TRI	0.555555555555556
TP53	IL13RA1	TRI	0.555555555555556
KLF6	TGFBR2	TRI	0.555555555555556
KLF13	CCL5	TRI	0.666666666666667
CREM	CCNA2	TRI	0.555555555555556
TP53	TRIM55	TRI	0.555555555555556
YBX1	COL1A1	TRI	0.555555555555556
LEF1	LEF1	TRI	0.777777777777778
NR1I3	CYP2C9	TRI	0.555555555555556
EGR1	EGR1	TRI	0.666666666666667
NFIC	HSPA4	TRI	0.666666666666667
CEBPD	TF	TRI	0.555555555555556
STAT1	STAT1	TRI	1
BCL6	TP53	TRI	0.555555555555556
STAT1	IFI6	TRI	0.666666666666667
FOS	FOS	TRI	0.666666666666667
PPARA	LPAL2	TRI	0.555555555555556
RUNX2	FN1	TRI	0.555555555555556
MAZ	MAZ	TRI	0.555555555555556
NFIC	APOH	TRI	0.555555555555556
NFIC	HBB	TRI	0.555555555555556
FOSB	PLAT	TRI	0.555555555555556
ETS1	CD53	TRI	0.555555555555556
NFIC	PLAT	TRI	0.666666666666667

## Sheet: BCLC stage A HCC
Protein1	Protein2	Iteraction type	Frequence
MAPK1	SOS1	PPI	0.517857142857143
CLU	PON1	PPI	0.535714285714286
IL6R	IL6R	PPI	0.678571428571429
SPEN	NCOR1	PPI	0.517857142857143
TES	TES	PPI	0.535714285714286
TPD52L1	TPD52L1	PPI	0.803571428571429
FN1	COL1A2	PPI	0.696428571428571
CXCL12	FN1	PPI	0.785714285714286
CCNB2	CDC2	PPI	0.732142857142857
ARHGDIA	NEDD4L	PPI	0.5
PRPF40A	PRPF40A	PPI	0.535714285714286
ESR1	ESR1	PPI	0.839285714285714
GLS2	PAG1	PPI	0.571428571428571
CRP	CRP	PPI	0.857142857142857
RRM1	RRM2	PPI	0.5
FBLN1	FN1	PPI	0.5
DPP4	CXCL10	PPI	0.5
TBL1XR1	NCOR1	PPI	0.642857142857143
GHR	JAK1	PPI	0.571428571428571
HSP90AB1	HSP90AB1	PPI	0.696428571428571
ATF3	ATF3	PPI	0.821428571428571
IL1RAP	IL1B	PPI	0.982142857142857
GPHN	GPHN	PPI	0.625
PRSS23	RACGAP1	PPI	0.5
IGFBP3	CD44	PPI	0.589285714285714
CCNB1	PBK	PPI	0.767857142857143
GRB10	EGFR	PPI	0.571428571428571
STAT1	MDK	PPI	0.732142857142857
CDH1	CTNNB1	PPI	0.589285714285714
STRAP	STRAP	PPI	0.589285714285714
SQSTM1	SQSTM1	PPI	0.857142857142857
CXCR4	ADRBK2	PPI	0.553571428571429
EGFR	S100A9	PPI	0.553571428571429
GRB10	MAP2K1	PPI	0.678571428571429
ST8SIA4	ST8SIA4	PPI	0.607142857142857
HTATIP2	ETS1	PPI	0.5
CDH1	RRM2	PPI	0.625
BGN	APOB	PPI	0.5
NR1I3	MAP4	PPI	0.517857142857143
GART	GART	PPI	0.660714285714286
TBX3	TBX3	PPI	0.678571428571429
SMARCA4	ARID1A	PPI	0.553571428571429
DLG1	VIL2	PPI	0.553571428571429
EZH2	SUZ12	PPI	0.553571428571429
F5	F5	PPI	0.857142857142857
TPR	MAPK1	PPI	0.535714285714286
PLA2G2A	VCAN	PPI	0.714285714285714
CXCR4	PTPRC	PPI	0.678571428571429
FNTB	CENPF	PPI	0.553571428571429
MLL	MLL	PPI	0.589285714285714
C19orf2	C19orf2	PPI	0.535714285714286
CDC20	CCNA2	PPI	0.660714285714286
SLAMF7	SLAMF7	PPI	0.517857142857143
NBR1	NBR1	PPI	0.767857142857143
SRGN	UBQLN4	PPI	0.5
CXCL12	CXCL12	PPI	0.928571428571429
ANKRD11	NCOA2	PPI	0.660714285714286
ESR1	SOS1	PPI	0.696428571428571
DAB2	TGFBR1	PPI	0.553571428571429
IGF2	IGFBP2	PPI	0.5
ZBTB16	ESR1	PPI	0.571428571428571
CDC2	PBK	PPI	0.75
FCGR2B	LY6E	PPI	0.714285714285714
KPNB1	KPNB1	PPI	0.607142857142857
SRGN	ALB	PPI	0.696428571428571
ITGA4	VCAN	PPI	0.589285714285714
CLDN1	BRD4	PPI	0.535714285714286
CDC2	ECT2	PPI	0.785714285714286
ITGA2	ITGA2	PPI	0.5
C1S	C1S	PPI	0.732142857142857
HMMR	CD44	PPI	0.535714285714286
SERPINE2	COL4A1	PPI	0.607142857142857
MASP1	MBL2	PPI	0.625
EPAS1	EP300	PPI	0.5
TLE1	HLA-DQA1	PPI	0.589285714285714
FOS	JUNB	PPI	0.535714285714286
IL1RAP	IL1R1	PPI	0.571428571428571
SPARCL1	PRNP	PPI	0.5
CASP1	IL1B	PPI	0.785714285714286
SOCS2	EPOR	PPI	0.785714285714286
CTSB	IGF1	PPI	0.607142857142857
FEZ1	RIF1	PPI	0.625
SRGAP2	ROBO1	PPI	0.589285714285714
CCL20	VCAN	PPI	0.75
JAK1	SOCS3	PPI	0.517857142857143
ZBTB16	CDC2	PPI	0.553571428571429
JAK1	STAT1	PPI	0.589285714285714
FOS	STAT1	PPI	0.785714285714286
MAPK1	LIFR	PPI	0.535714285714286
EGFR	STAT1	PPI	0.535714285714286
STOM	STOM	PPI	0.5
STAT1	IFNGR1	PPI	0.660714285714286
NOL3	NOL3	PPI	0.642857142857143
CAP2	PRPF40A	PPI	0.535714285714286
CDKN2A	ANKRD12	PPI	0.625
PTPRC	PTPRC	PPI	0.875
LILRB2	HLA-C	PPI	0.5
ITGA9	ITGA9	PPI	0.803571428571429
STAT1	EP300	PPI	0.535714285714286
TGFBR1	UBD	PPI	0.553571428571429
ADRA1A	RGS2	PPI	0.642857142857143
EP300	EP300	PPI	0.589285714285714
ATXN1	EIF1AY	PPI	0.5
RGS4	GNAO1	PPI	0.571428571428571
AGTR1	EGFR	PPI	0.517857142857143
HSP90AB1	ESR1	PPI	0.625
MMRN1	F5	PPI	0.785714285714286
PPP2R1B	CDC2	PPI	0.696428571428571
ERBB3	NRG1	PPI	0.625
CD84	CD84	PPI	0.517857142857143
PON1	ALB	PPI	0.553571428571429
FHL2	FHL2	PPI	0.535714285714286
HBA1	NAP1L1	PPI	0.535714285714286
AQP1	AQP1	PPI	0.517857142857143
SMURF2	SPG20	PPI	0.589285714285714
CDC20	CDC20	PPI	0.696428571428571
HMOX1	HMOX1	PPI	0.642857142857143
C8B	C8A	PPI	0.660714285714286
ANAPC5	TGFBR1	PPI	0.517857142857143
YWHAB	SRRM2	PPI	0.571428571428571
CDC2	DUT	PPI	0.642857142857143
TLE1	LEF1	PPI	0.517857142857143
CCR1	CCL4	PPI	0.571428571428571
DEFB1	RIF1	PPI	0.607142857142857
DAB2	CDC2	PPI	0.571428571428571
PTPRC	SKAP1	PPI	0.642857142857143
SH3RF1	RACGAP1	PPI	0.535714285714286
MAP2K1	MAP2K1	PPI	0.875
MEP1B	FN1	PPI	0.678571428571429
MATN2	MATN2	PPI	0.535714285714286
PLOD3	PLOD3	PPI	0.553571428571429
MTUS1	MTUS1	PPI	0.589285714285714
DAB2	MYO6	PPI	0.589285714285714
CLEC4M	CLEC4M	PPI	0.964285714285714
HEY1	HEY1	PPI	0.625
SOCS2	GHR	PPI	0.785714285714286
RAB8B	CDH1	PPI	0.553571428571429
JAK1	JAK1	PPI	0.642857142857143
FOS	ETS1	PPI	0.535714285714286
CLU	C9	PPI	0.5
CDC2	RRM2	PPI	0.821428571428571
TNPO1	TNPO1	PPI	0.607142857142857
TMPRSS6	FN1	PPI	0.517857142857143
EPHA3	EPHA3	PPI	0.821428571428571
NIN	NIN	PPI	0.517857142857143
CDC2	KIF11	PPI	0.607142857142857
RAB11FIP4	RAB11FIP4	PPI	0.5
IL6ST	TLE1	PPI	0.535714285714286
GLS2	DLG1	PPI	0.571428571428571
SNTB2	SNTB2	PPI	0.517857142857143
MAPK1	EPOR	PPI	0.517857142857143
TPR	IFI16	PPI	0.714285714285714
TOP1	TOP1	PPI	0.821428571428571
MCL1	MCL1	PPI	0.785714285714286
PRKAR2B	PRKAR2B	PPI	0.803571428571429
LY96	TLR4	PPI	0.517857142857143
PGGT1B	KRAS	PPI	0.5
HSPD1	HSPD1	PPI	0.642857142857143
HBD	HBD	PPI	0.875
GADD45B	CDC2	PPI	0.589285714285714
RORA	RORA	PPI	0.553571428571429
IGHM	PTK2	PPI	0.517857142857143
TGM2	TGM2	PPI	0.875
ENAH	ENAH	PPI	0.857142857142857
SLC1A2	SLC1A2	PPI	0.910714285714286
NCOA3	DDX17	PPI	0.589285714285714
SKP1A	CCNA2	PPI	0.535714285714286
F11R	F11R	PPI	0.5
NFAT5	NFAT5	PPI	0.660714285714286
TPD52L1	YWHAB	PPI	0.517857142857143
ICAM1	ICAM1	PPI	0.553571428571429
FBXO7	SKP1A	PPI	0.5
KLKB1	HGF	PPI	0.696428571428571
PFN2	PFN2	PPI	0.642857142857143
OGT	OGT	PPI	0.625
TPR	SHC1	PPI	0.517857142857143
CTH	CTH	PPI	0.714285714285714
BAT1	BAT1	PPI	0.589285714285714
NEDD9	NEDD9	PPI	0.553571428571429
CEP152	EPB41L3	PPI	0.5
PCOLCE	COL3A1	PPI	0.625
IFITM1	IFITM1	PPI	0.642857142857143
BIRC5	BIRC5	PPI	0.732142857142857
IFNGR1	IFNGR1	PPI	0.75
THBS1	COL5A1	PPI	0.553571428571429
CD74	HLA-DQB1	PPI	0.589285714285714
TLE1	TLE1	PPI	0.625
CCR1	CCR1	PPI	0.642857142857143
GBP1	GBP1	PPI	0.607142857142857
CD4	TFRC	PPI	0.5
F11	F11	PPI	0.839285714285714
VWF	VWF	PPI	0.875
CCND1	ESR1	PPI	0.589285714285714
MAP3K13	MAP3K13	PPI	0.678571428571429
CCL5	CCL5	PPI	0.678571428571429
MET	HGF	PPI	0.589285714285714
ZHX2	ZHX2	PPI	0.589285714285714
MASP2	MASP2	PPI	0.75
CDKN2A	HSP90AB1	PPI	0.553571428571429
STAT1	JUN	PPI	0.571428571428571
THRSP	THRSP	PPI	0.982142857142857
EP300	DDX24	PPI	0.5
TPM2	TPM2	PPI	0.642857142857143
ETS2	ETS2	PPI	0.75
CDK6	CDKN2A	PPI	0.678571428571429
CTNNA1	DLG1	PPI	0.535714285714286
IL8	IL8	PPI	0.982142857142857
NFIL3	NFIL3	PPI	0.5
VWF	CALR	PPI	0.535714285714286
FOS	FOS	PPI	0.928571428571429
PTK2	STAT1	PPI	0.553571428571429
TOB2	TOB2	PPI	0.660714285714286
TNFRSF11B	VWF	PPI	0.678571428571429
AP1GBP1	SCAMP1	PPI	0.5
HGFAC	HGF	PPI	0.678571428571429
NR1I2	NR1I2	PPI	0.571428571428571
IL6ST	PLAUR	PPI	0.607142857142857
S100A10	S100A10	PPI	0.625
ACAT2	ACAT2	PPI	0.5
TBL1X	TBL1XR1	PPI	0.732142857142857
PLA2G4C	PLA2G4C	PPI	0.678571428571429
CSTA	CSTA	PPI	0.625
CDC20	MAD2L1	PPI	0.571428571428571
JUN	NCOA2	PPI	0.553571428571429
CXCL1	CXCL1	PPI	0.5
TGFBR1	CTNNB1	PPI	0.5
P4HA2	P4HA2	PPI	0.517857142857143
SH3KBP1	SH3KBP1	PPI	0.535714285714286
MCM7	MCM7	PPI	0.5
HLA-B	HLA-B	PPI	0.589285714285714
FBLN1	FBLN1	PPI	0.589285714285714
CDC20	AURKA	PPI	0.696428571428571
HGD	HGD	PPI	0.660714285714286
OAT	OAT	PPI	0.571428571428571
ACTN4	SERPINE1	PPI	0.5
PLAUR	JAK1	PPI	0.517857142857143
AKAP8L	AKAP8L	PPI	0.571428571428571
CCL4	IL8	PPI	0.75
SHBG	SHBG	PPI	0.767857142857143
CDA	CDA	PPI	0.642857142857143
UBD	MAD2L1	PPI	0.678571428571429
DIO1	DIO1	PPI	0.535714285714286
SFRS11	TOP1	PPI	0.517857142857143
GHR	SHC1	PPI	0.517857142857143
LRG1	FN1	PPI	0.714285714285714
SEPT2	SEPT6	PPI	0.553571428571429
PLD1	RALA	PPI	0.5
HBA1	HBB	PPI	0.875
CASP4	CASP4	PPI	0.553571428571429
INSR	SOCS2	PPI	0.535714285714286
NAP1L1	NAP1L1	PPI	0.571428571428571
CADM1	EPB41L3	PPI	0.589285714285714
IL6ST	IL6R	PPI	0.535714285714286
RDBP	RDBP	PPI	0.517857142857143
JAK1	PDGFRA	PPI	0.517857142857143
KPNA2	KPNA2	PPI	0.75
TCF7L2	CTNNB1	PPI	0.535714285714286
COL4A1	COL4A2	PPI	0.589285714285714
F5	CALR	PPI	0.535714285714286
HSP90B1	HSP90B1	PPI	0.535714285714286
CALR	CALR	PPI	0.625
EFNB2	EFNB2	PPI	0.625
TEK	PTPRB	PPI	0.535714285714286
JUN	ETS2	PPI	0.5
GRHL1	GRHL1	PPI	0.625
ITGA9	SPP1	PPI	0.696428571428571
CCL5	PIGR	PPI	0.571428571428571
CREM	CREM	PPI	0.553571428571429
IL8RB	CXCL6	PPI	0.857142857142857
TLR4	TLR1	PPI	0.5
CBX3	CBX3	PPI	0.75
PBLD	STRAP	PPI	0.517857142857143
IFI16	ID1	PPI	0.571428571428571
CD4	PTPRC	PPI	0.517857142857143
PRC1	RACGAP1	PPI	0.839285714285714
RASSF5	RASSF5	PPI	0.642857142857143
DDX24	DDX24	PPI	0.625
LDLR	LDLR	PPI	0.517857142857143
GNA14	CCR1	PPI	0.5
JUB	SLC1A2	PPI	0.5
CDK6	CCND1	PPI	0.517857142857143
GNAO1	GNAO1	PPI	0.821428571428571
MDH1	MDH1	PPI	0.553571428571429
VWF	COL1A1	PPI	0.571428571428571
CD74	HLA-DPA1	PPI	0.553571428571429
CD69	CD69	PPI	0.571428571428571
KCNN2	KCNN2	PPI	0.964285714285714
PLD1	ARF1	PPI	0.5
MARCKS	CTSB	PPI	0.571428571428571
SMAD5	HBG2	PPI	0.535714285714286
MT2A	SHBG	PPI	0.589285714285714
CXCR4	PTK2	PPI	0.517857142857143
SPTAN1	CTNNA1	PPI	0.535714285714286
CASP4	IL1B	PPI	0.553571428571429
CDC2	BIRC5	PPI	0.678571428571429
PRELP	FN1	PPI	0.589285714285714
TNFSF10	TNFSF10	PPI	0.660714285714286
YWHAZ	RALGPS2	PPI	0.571428571428571
FN1	DCN	PPI	0.732142857142857
CTNNB1	CDK6	PPI	0.625
AKAP9	PPP2R1B	PPI	0.571428571428571
CTNNB1	MET	PPI	0.517857142857143
CSNK1A1	CTNNB1	PPI	0.571428571428571
FCN3	FCN3	PPI	0.928571428571429
CXCL12	CXCR4	PPI	0.714285714285714
TFPI2	F11	PPI	0.803571428571429
FN1	COL1A1	PPI	0.607142857142857
GNAI1	EPOR	PPI	0.553571428571429
RACGAP1	RACGAP1	PPI	0.910714285714286
ECGF1	ECGF1	PPI	0.5
THBS2	THBS2	PPI	0.803571428571429
IL6ST	LIFR	PPI	0.767857142857143
FAS	FAS	PPI	0.535714285714286
PRKCB1	TOP2A	PPI	0.517857142857143
SLC16A10	RACGAP1	PPI	0.732142857142857
GATM	GATM	PPI	0.589285714285714
YWHAB	RALGPS2	PPI	0.517857142857143
CTSB	CTSB	PPI	0.696428571428571
EP300	ESR1	PPI	0.5
TRIP13	TRIP13	PPI	0.5
CLEC4G	CLEC4G	PPI	0.964285714285714
MERTK	MERTK	PPI	0.589285714285714
FN1	HGF	PPI	0.803571428571429
PVRL2	PVRL2	PPI	0.571428571428571
ENAH	FAT	PPI	0.785714285714286
COL4A1	SAA1	PPI	0.517857142857143
AURKA	NDC80	PPI	0.839285714285714
TAP2	TAP1	PPI	0.517857142857143
RRM1	RRM1	PPI	0.553571428571429
PAH	PAH	PPI	0.607142857142857
DDX39	BAT1	PPI	0.5
COL1A2	SHBG	PPI	0.553571428571429
HGF	LCN2	PPI	0.607142857142857
NCOA3	CCND1	PPI	0.517857142857143
CCR1	CCL2	PPI	0.535714285714286
EFNB2	EPHA3	PPI	0.517857142857143
PPFIBP1	PPFIBP1	PPI	0.767857142857143
IL8RB	IL8RB	PPI	0.928571428571429
EP300	EGR1	PPI	0.571428571428571
ATXN3	CASP1	PPI	0.589285714285714
TRIM28	TRIM28	PPI	0.660714285714286
TEK	TEK	PPI	0.553571428571429
SSBP1	SSBP1	PPI	0.517857142857143
CDKN2A	CDKN2A	PPI	0.785714285714286
MCM5	STAT1	PPI	0.553571428571429
CDH1	VIL2	PPI	0.625
CIDEB	CIDEB	PPI	0.732142857142857
LCP2	PTPRC	PPI	0.553571428571429
RDH5	RDH5	PPI	0.589285714285714
ST6GAL2	ST6GAL2	PPI	0.821428571428571
MBL2	PTPRC	PPI	0.571428571428571
CRYAA	CRYAA	PPI	0.642857142857143
NR5A2	ALB	PPI	0.571428571428571
SYT9	SYT9	PPI	0.642857142857143
NBN	H2AFX	PPI	0.517857142857143
ANGPTL1	ANGPTL1	PPI	0.910714285714286
GGA1	GGA1	PPI	0.571428571428571
INSR	INSR	PPI	0.625
ASCL1	ASCL1	PPI	0.946428571428571
CNDP1	CNDP1	PPI	0.964285714285714
CCDC91	CCDC91	PPI	0.517857142857143
ADAM9	ITGA6	PPI	0.589285714285714
H2AFX	H2AFX	PPI	0.821428571428571
EGFR	EGFR	PPI	0.642857142857143
MDK	JAK1	PPI	0.553571428571429
NEK2	NEK2	PPI	0.839285714285714
CPSF1	CPSF1	PPI	0.553571428571429
ARF1	ARF1	PPI	0.517857142857143
MAPK1	MAPK1	PPI	0.553571428571429
CHD9	ESR1	PPI	0.607142857142857
HEY2	HEY2	PPI	0.571428571428571
TCF4	TCF4	PPI	0.589285714285714
MNDA	CDC2	PPI	0.607142857142857
LUM	COL1A2	PPI	0.625
HOMER1	HOMER1	PPI	0.803571428571429
PTTG1	CDC20	PPI	0.696428571428571
GSTZ1	GSTZ1	PPI	0.803571428571429
EIF5	EIF1AY	PPI	0.803571428571429
GSTM1	GSTM1	PPI	0.75
FCGR2B	CRP	PPI	0.732142857142857
GPLD1	APOA4	PPI	0.785714285714286
TLR4	CD14	PPI	0.517857142857143
CHN2	TGFBR1	PPI	0.517857142857143
IRAK1	IRAK1	PPI	0.553571428571429
GCH1	GCH1	PPI	0.571428571428571
TAP2	HLA-C	PPI	0.571428571428571
YWHAB	OSBPL3	PPI	0.589285714285714
TLE1	CDC2	PPI	0.5
BUB1	CDC20	PPI	0.517857142857143
ABCD3	ABCD3	PPI	0.732142857142857
DFNB31	DFNB31	PPI	0.517857142857143
FGF13	FGF13	PPI	0.732142857142857
EEA1	EEA1	PPI	0.589285714285714
FEZ1	NBR1	PPI	0.589285714285714
CXCL10	CXCL10	PPI	0.732142857142857
ATF6	ATF6	PPI	0.589285714285714
ALDH3A1	ALDH3A1	PPI	0.660714285714286
MAPK1	FOS	PPI	0.5
SOCS3	SOCS2	PPI	0.642857142857143
SPTAN1	DDX24	PPI	0.517857142857143
MDK	UBQLN4	PPI	0.517857142857143
PLD1	CDC42	PPI	0.5
HLA-A	HLA-A	PPI	0.625
MAP2	MAP2	PPI	0.821428571428571
GRB10	GHR	PPI	0.678571428571429
ADSSL1	ADSSL1	PPI	0.5
CTSS	SLPI	PPI	0.5
LPA	FN1	PPI	0.696428571428571
EIF5A	TGM2	PPI	0.571428571428571
TAPBP	HLA-C	PPI	0.714285714285714
ESR1	CTNNB1	PPI	0.642857142857143
FASN	FASN	PPI	0.553571428571429
CDH1	EGFR	PPI	0.517857142857143
PDGFRA	PDGFRA	PPI	0.785714285714286
ESR1	CALM1	PPI	0.517857142857143
FN1	COL4A2	PPI	0.553571428571429
SMARCA4	IKZF1	PPI	0.535714285714286
SYTL4	SYTL4	PPI	0.732142857142857
PTPRC	VIL2	PPI	0.678571428571429
RPL5	RPL5	PPI	0.607142857142857
PBX1	MYH10	PPI	0.553571428571429
SKP1A	SKP1A	PPI	0.607142857142857
PRNP	HSPD1	PPI	0.535714285714286
HSD17B14	HSD17B14	PPI	0.696428571428571
HLA-C	CALR	PPI	0.607142857142857
GLUL	GLUL	PPI	0.732142857142857
AZGP1	AZGP1	PPI	0.5
SPP1	UBQLN4	PPI	0.535714285714286
CETP	CETP	PPI	0.910714285714286
TPD52L1	YWHAZ	PPI	0.517857142857143
CD36	COL1A1	PPI	0.5
IL8RB	CXCL2	PPI	0.785714285714286
EP300	NCOA2	PPI	0.553571428571429
MLLT10	MLLT10	PPI	0.857142857142857
TAPBP	TAP1	PPI	0.517857142857143
FEZ1	OLFML3	PPI	0.625
TIAM1	TIAM1	PPI	0.553571428571429
ASCL1	EP300	PPI	0.553571428571429
PTK2	SOCS2	PPI	0.607142857142857
PDZK1	SLC17A1	PPI	0.5
CTSC	CTSC	PPI	0.767857142857143
SERPINE1	UBQLN4	PPI	0.589285714285714
YWHAB	YWHAB	PPI	0.678571428571429
SYNJ2	SYNJ2	PPI	0.607142857142857
KCNJ8	KCNJ8	PPI	0.5
FN1	SMAD4	PPI	0.517857142857143
TLE1	CDKN2C	PPI	0.571428571428571
ATF3	NUF2	PPI	0.75
TGFA	TGFA	PPI	0.607142857142857
CTSA	CTSA	PPI	0.660714285714286
AURKA	AURKA	PPI	0.946428571428571
PDCD6	PDCD6	PPI	0.607142857142857
INHBE	INHBE	PPI	0.678571428571429
HBG2	HBB	PPI	0.803571428571429
DLG5	CTNNB1	PPI	0.517857142857143
MDK	MDK	PPI	0.875
RAPGEF2	CTNNB1	PPI	0.5
CHD9	NR1I3	PPI	0.642857142857143
NT5E	FN1	PPI	0.678571428571429
HGS	MET	PPI	0.517857142857143
PDGFRA	STAT1	PPI	0.678571428571429
MAP2K1	EP300	PPI	0.517857142857143
NCOA2	DDX17	PPI	0.625
LCP1	LCP1	PPI	0.5
STAT1	STAT1	PPI	0.839285714285714
NCOR1	ESR1	PPI	0.660714285714286
INSR	IGF2	PPI	0.571428571428571
PRKD2	PRKD2	PPI	0.910714285714286
JAK1	IFNGR1	PPI	0.642857142857143
CCND1	CTNNB1	PPI	0.517857142857143
VIL2	VIL2	PPI	0.732142857142857
EPOR	EPOR	PPI	0.910714285714286
CD1D	PTPRC	PPI	0.553571428571429
ABAT	ABAT	PPI	0.839285714285714
ESR1	EGFR	PPI	0.553571428571429
CASP1	CASP1	PPI	0.785714285714286
KPNA2	CSNK1A1	PPI	0.535714285714286
GNAI1	GNAI1	PPI	0.571428571428571
ERBB3	ERBB3	PPI	0.714285714285714
HSPA1A	HSPA1A	PPI	0.535714285714286
CCNA2	CDC2	PPI	0.803571428571429
ST6GAL1	ST6GAL1	PPI	0.857142857142857
PSME3	PSME3	PPI	0.517857142857143
SQSTM1	GRIA3	PPI	0.589285714285714
CDC2	CKS2	PPI	0.660714285714286
CRYAA	ALB	PPI	0.517857142857143
KLKB1	IGFBP3	PPI	0.660714285714286
THBS1	TFPI	PPI	0.696428571428571
PDGFA	PDGFA	PPI	0.5
DUT	DUT	PPI	0.767857142857143
CDC2	TOP2A	PPI	0.821428571428571
C8B	CLU	PPI	0.535714285714286
DUT	PPARA	PPI	0.5
MAD2L1	MAD2L1	PPI	0.732142857142857
JAK1	CXCR4	PPI	0.535714285714286
TTR	TTR	PPI	0.5
TGFBR1	TGFBR1	PPI	0.589285714285714
THBS1	CALR	PPI	0.571428571428571
F11	HGF	PPI	0.803571428571429
CDC2	KHDRBS1	PPI	0.517857142857143
IGJ	IGHM	PPI	0.625
FPRL1	FPRL1	PPI	0.535714285714286
TACC1	AURKA	PPI	0.571428571428571
TCF4	CTNNB1	PPI	0.517857142857143
ATXN1	ATXN1	PPI	0.535714285714286
RALBP1	CCNB1	PPI	0.642857142857143
IGF1	IGFBP3	PPI	0.821428571428571
ATF3	JUN	PPI	0.553571428571429
THBS1	FN1	PPI	0.785714285714286
AXL	AXL	PPI	0.571428571428571
CASP1	LMNA	PPI	0.535714285714286
WASL	WIPF2	PPI	0.571428571428571
MT1F	SHBG	PPI	0.75
TRIP13	PLAC8	PPI	0.5
MCM8	MCM7	PPI	0.5
PPP2R1B	STRN3	PPI	0.5
SQSTM1	TGFBR1	PPI	0.553571428571429
JUNB	FOSB	PPI	0.535714285714286
CCL4	CCL4	PPI	0.75
HIBADH	HIBADH	PPI	0.571428571428571
CALD1	CALM1	PPI	0.5
ETS2	NCOR1	PPI	0.535714285714286
RAB27B	SYTL4	PPI	0.625
NDC80	NDC80	PPI	0.839285714285714
SOCS3	CXCR4	PPI	0.571428571428571
ALB	AGA	PPI	0.678571428571429
DGKZ	LEPR	PPI	0.535714285714286
SGOL2	PPP2R1B	PPI	0.732142857142857
RASSF5	KRAS	PPI	0.535714285714286
PTK2	VIL2	PPI	0.517857142857143
BHLHB2	BHLHB2	PPI	0.589285714285714
EGFR	SCAMP1	PPI	0.535714285714286
TNFRSF10D	TNFSF10	PPI	0.571428571428571
CD74	CD74	PPI	0.642857142857143
DTNA	SNTB1	PPI	0.517857142857143
MID1	MID1	PPI	0.607142857142857
BRD7	RIF1	PPI	0.642857142857143
SFRS3	PCBP2	PPI	0.5
SEC61A1	SEC61A1	PPI	0.553571428571429
GHR	GHR	PPI	0.892857142857143
SMARCA4	TMF1	PPI	0.535714285714286
EP300	LEF1	PPI	0.517857142857143
SOCS3	IL6ST	PPI	0.607142857142857
IL6ST	JAK1	PPI	0.607142857142857
TACSTD1	TACSTD1	PPI	0.910714285714286
CLDN1	CLDN1	PPI	0.75
UGP2	UGP2	PPI	0.821428571428571
SOCS3	GHR	PPI	0.696428571428571
FGFR4	FGFR4	PPI	0.571428571428571
ERBB3	EGFR	PPI	0.5
IL1RAP	IRAK1	PPI	0.553571428571429
SULT1C2	SULT1C2	PPI	0.625
S100A9	S100A9	PPI	0.857142857142857
FOS	LMNA	PPI	0.678571428571429
TPM1	JUN	PPI	0.5
IFI27	CCND1	PPI	0.553571428571429
CNTN4	CNTN4	PPI	0.785714285714286
COL4A1	SAA4	PPI	0.607142857142857
MAPK1	DUSP1	PPI	0.535714285714286
TPD52L1	TPD52	PPI	0.5
FGA	FGA	PPI	0.571428571428571
TACC1	TACC1	PPI	0.625
PECAM1	PECAM1	PPI	0.535714285714286
SH3KBP1	SOS1	PPI	0.5
PPARA	PPARA	PPI	0.642857142857143
ERBB3	SOS1	PPI	0.607142857142857
PRDX4	PRDX4	PPI	0.535714285714286
S100P	S100P	PPI	0.732142857142857
NBN	TERF1	PPI	0.5
SLC4A4	CA2	PPI	0.535714285714286
PTPRM	PTPRM	PPI	0.553571428571429
TPM2	TPM1	PPI	0.535714285714286
CCR1	STAT1	PPI	0.517857142857143
VWF	COL1A2	PPI	0.642857142857143
S100A9	S100A8	PPI	0.839285714285714
MEP1B	MEP1B	PPI	0.75
RACGAP1	CHN2	PPI	0.660714285714286
ENPEP	ENPEP	PPI	0.732142857142857
PDCD2	NCOR1	PPI	0.553571428571429
THBS1	DCN	PPI	0.803571428571429
SCAMP1	SCAMP1	PPI	0.821428571428571
EED	EED	PPI	0.517857142857143
EXOSC4	EXOSC4	PPI	0.5
CHI3L1	CHI3L1	PPI	0.857142857142857
DPP4	CXCL12	PPI	0.678571428571429
CDC2	LMNA	PPI	0.553571428571429
AKAP9	PRKAR2B	PPI	0.535714285714286
HLA-C	B2M	PPI	0.5
HLA-F	HLA-F	PPI	0.732142857142857
PDCD4	PDCD4	PPI	0.696428571428571
ITGA4	ITGA4	PPI	0.625
TNFSF13B	TNFSF13B	PPI	0.589285714285714
PDK4	PDK4	PPI	0.892857142857143
JUN	TOP1	PPI	0.553571428571429
BCL2L1	BCL2L1	PPI	0.553571428571429
LGALS3BP	LGALS3BP	PPI	0.696428571428571
COL14A1	CD44	PPI	0.535714285714286
TFRC	TF	PPI	0.535714285714286
CASP1	EGFR	PPI	0.571428571428571
CD46	CD46	PPI	0.553571428571429
AR	AR	PPI	0.5
PTK2	PTK2	PPI	0.642857142857143
GLDC	GLDC	PPI	0.625
FGFR4	STAT1	PPI	0.5
ESR1	HSPA4	PPI	0.714285714285714
COL4A1	COL4A1	PPI	0.821428571428571
TNFRSF10A	TNFRSF10A	PPI	0.607142857142857
SF1	DDX17	PPI	0.589285714285714
GSTA4	GSTA4	PPI	0.678571428571429
SHC1	ESR1	PPI	0.5
CDC2	PTTG1	PPI	0.803571428571429
CD4	CD4	PPI	0.571428571428571
KIF11	KIF11	PPI	0.607142857142857
ANAPC5	SMURF2	PPI	0.553571428571429
KLKB1	HGFAC	PPI	0.517857142857143
IL1B	IL1B	PPI	1
CHD4	SMARCA4	PPI	0.553571428571429
SMURF2	DAB2	PPI	0.535714285714286
CDK6	CDK6	PPI	0.785714285714286
VIL2	CTNNB1	PPI	0.589285714285714
CCNB1	CDC2	PPI	0.767857142857143
YWHAZ	YWHAZ	PPI	0.660714285714286
RET	RET	PPI	0.517857142857143
CDC2	MCM4	PPI	0.607142857142857
CXCR4	CXCR4	PPI	0.767857142857143
MAOA	MAOA	PPI	0.553571428571429
IL1RL1	IL33	PPI	0.75
DCTD	DCTD	PPI	0.75
ADAMTS13	VWF	PPI	0.642857142857143
LEPR	LEPR	PPI	0.875
TCF3	TCF3	PPI	0.5
SELE	CD44	PPI	0.5
CD36	ITGA6	PPI	0.678571428571429
FN1	CRP	PPI	0.732142857142857
ADH1A	ADH1A	PPI	0.625
KPNA2	LEF1	PPI	0.678571428571429
CDKN2C	CDKN2A	PPI	0.714285714285714
THBS1	COL1A1	PPI	0.607142857142857
SOCS3	INSR	PPI	0.5
HBE1	HBA2	PPI	0.803571428571429
CD36	COL1A2	PPI	0.571428571428571
KHDRBS1	KHDRBS1	PPI	0.642857142857143
RAP2A	RAP2A	PPI	0.660714285714286
CTSD	IGFBP3	PPI	0.5
HGF	HGF	PPI	0.928571428571429
RTN4	UQCRC2	PPI	0.5
SLC31A1	SLC31A1	PPI	0.607142857142857
NBN	PRKDC	PPI	0.571428571428571
KPNA2	RECQL	PPI	0.535714285714286
CENPF	CENPF	PPI	0.892857142857143
BRD7	HNRPUL1	PPI	0.5
PCSK6	PCSK6	PPI	0.696428571428571
FBXW11	FBXW11	PPI	0.517857142857143
MCM8	MCM6	PPI	0.571428571428571
KHK	KHK	PPI	0.553571428571429
SOS1	SOS1	PPI	0.839285714285714
IGF1	IGFBP2	PPI	0.5
GNAS	GNAS	PPI	0.625
HBA2	HBA2	PPI	0.857142857142857
DCN	COL4A1	PPI	0.678571428571429
HBG2	HBG2	PPI	0.821428571428571
YWHAB	RACGAP1	PPI	0.589285714285714
DACH1	NCOR1	PPI	0.696428571428571
EMILIN1	EMILIN1	PPI	0.5
DLG1	MYO6	PPI	0.571428571428571
TNFRSF11B	THBS1	PPI	0.75
IGFALS	IGF1	PPI	0.839285714285714
SOD2	SOD2	PPI	0.821428571428571
BHMT	BHMT	PPI	0.660714285714286
MBL2	MBL2	PPI	0.642857142857143
SMURF2	SF3A2	PPI	0.535714285714286
SFRP1	FZD6	PPI	0.607142857142857
NDFIP2	NEDD4L	PPI	0.517857142857143
PFN2	PLAUR	PPI	0.535714285714286
GADD45B	ESR1	PPI	0.625
RELN	RELN	PPI	0.607142857142857
PRKDC	PRKDC	PPI	0.785714285714286
FLAD1	FLAD1	PPI	0.535714285714286
IL6ST	IL6ST	PPI	0.803571428571429
DCPS	DCPS	PPI	0.5
TCF7L2	EP300	PPI	0.535714285714286
NCOA2	CTNNB1	PPI	0.642857142857143
MET	MET	PPI	0.642857142857143
EP300	NCOA3	PPI	0.5
CFHR4	CFHR4	PPI	0.678571428571429
UBD	NUB1	PPI	0.553571428571429
CCL19	CCL19	PPI	0.767857142857143
B2M	B2M	PPI	0.517857142857143
MBL2	MASP2	PPI	0.5
DPT	DCN	PPI	0.857142857142857
EGFR	PLD1	PPI	0.625
THBS1	FGA	PPI	0.535714285714286
MCM4	MCM6	PPI	0.535714285714286
RPS6KC1	RPS6KC1	PPI	0.589285714285714
CTSB	SLPI	PPI	0.517857142857143
FBLN1	VCAN	PPI	0.553571428571429
SQSTM1	NBR1	PPI	0.660714285714286
HGS	EHMT2	PPI	0.553571428571429
ADRA1A	IL8RB	PPI	0.892857142857143
MCM6	MCM6	PPI	0.642857142857143
PDLIM5	PRKCB1	PPI	0.517857142857143
COL4A2	COL4A2	PPI	0.660714285714286
SMARCA4	SMARCC1	PPI	0.642857142857143
FOXP1	FOXP2	PPI	0.535714285714286
TNIK	TNIK	PPI	0.607142857142857
ESR1	TRIM28	PPI	0.535714285714286
CXCL10	VCAN	PPI	0.642857142857143
HIPK3	FAS	PPI	0.5
AMIGO2	AMIGO2	PPI	0.625
SRGN	CD44	PPI	0.553571428571429
C1R	C1R	PPI	0.553571428571429
CKS2	CKS2	PPI	0.696428571428571
CTNNB1	CTNNA1	PPI	0.625
PDZK1	SLC26A6	PPI	0.517857142857143
CPN1	CPN1	PPI	0.75
GLUD1	GLUD1	PPI	0.857142857142857
CLK4	CLK4	PPI	0.642857142857143
GPX2	GPX2	PPI	0.660714285714286
ITLN1	ITLN1	PPI	0.839285714285714
CD55	CD55	PPI	0.535714285714286
TNFSF10	TNFRSF11B	PPI	0.517857142857143
OSMR	IL6ST	PPI	0.571428571428571
APOA4	APOA4	PPI	0.857142857142857
ITGB3BP	ITGB3BP	PPI	0.5
SPAG9	SPAG9	PPI	0.660714285714286
UBE2C	UBE2C	PPI	0.732142857142857
AGA	AGA	PPI	0.821428571428571
S100A12	S100A12	PPI	0.982142857142857
KPNB1	KPNA2	PPI	0.517857142857143
DUSP1	HSPA4	PPI	0.75
GSTM3	GSTM3	PPI	0.607142857142857
FBP1	FBP1	PPI	0.714285714285714
MX1	MX1	PPI	0.678571428571429
ALOX5AP	ALOX5	PPI	0.553571428571429
ARHGDIA	ARHGDIA	PPI	0.571428571428571
NCOA3	ESR1	PPI	0.678571428571429
CENPK	SOX6	PPI	0.5
ECM1	FBLN1	PPI	0.553571428571429
EDD1	KPNA2	PPI	0.571428571428571
NUP62	NUP62	PPI	0.517857142857143
SMARCA4	CTNNB1	PPI	0.678571428571429
LYST	HGS	PPI	0.517857142857143
PDZK1	SLCO1A2	PPI	0.535714285714286
FXYD1	ATP1B1	PPI	0.553571428571429
TNFRSF11B	FN1	PPI	0.696428571428571
IFIT3	IFIT3	PPI	0.678571428571429
LGALS3BP	FN1	PPI	0.589285714285714
EP300	SOX9	PPI	0.5
TPD52	TPD52	PPI	0.625
CDC2	STMN1	PPI	0.714285714285714
CDKN3	CDC2	PPI	0.785714285714286
CLU	LEPR	PPI	0.571428571428571
SNX4	LEPR	PPI	0.517857142857143
DCN	COL1A1	PPI	0.535714285714286
FN1	COL4A1	PPI	0.678571428571429
FUS	FUS	PPI	0.571428571428571
ANGPTL1	TEK	PPI	0.535714285714286
GPLD1	GM2A	PPI	0.75
PRNP	APLP2	PPI	0.517857142857143
CALM1	CALM1	PPI	0.589285714285714
SOS1	EGFR	PPI	0.571428571428571
SEPT4	SEPT4	PPI	0.553571428571429
ID1	PSMD4	PPI	0.553571428571429
CASP1	BCL2L1	PPI	0.517857142857143
TRIB1	MAP2K1	PPI	0.785714285714286
DPP4	CXCR4	PPI	0.5
DVL3	DVL3	PPI	0.5
ESR1	DUT	PPI	0.660714285714286
NCOA2	NCOA2	PPI	0.821428571428571
SPEN	SOX9	PPI	0.589285714285714
GPR125	DLG1	PPI	0.589285714285714
TRIM23	TRIM23	PPI	0.589285714285714
C8A	C9	PPI	0.642857142857143
PRKCB1	PRKCB1	PPI	0.553571428571429
TFPI2	KLKB1	PPI	0.678571428571429
HSPA4	KPNA2	PPI	0.660714285714286
THY1	THY1	PPI	0.625
B4GALT1	B4GALT1	PPI	0.696428571428571
LEF1	CTNNB1	PPI	0.642857142857143
ARHGEF11	ARHGEF11	PPI	0.553571428571429
LMNA	LMNA	PPI	0.678571428571429
ENAH	GPHN	PPI	0.571428571428571
SOCS3	EPOR	PPI	0.696428571428571
FCN1	FCN1	PPI	0.660714285714286
PEX13	PEX13	PPI	0.5
FCN2	MASP1	PPI	0.964285714285714
JUN	TOP2A	PPI	0.571428571428571
TYMS	TYMS	PPI	0.714285714285714
NDC80	NUF2	PPI	0.785714285714286
TF	IGFBP3	PPI	0.553571428571429
CFTR	CFTR	PPI	0.678571428571429
MCM4	MCM4	PPI	0.660714285714286
NCOR1	TBL1X	PPI	0.517857142857143
NPHP3	NPHP3	PPI	0.732142857142857
ANK3	HOOK1	PPI	0.5
SOX9	KPNB1	PPI	0.517857142857143
FEZ1	FEZ1	PPI	0.714285714285714
ESR1	PIK3R3	PPI	0.5
DAO	ABP1	PPI	0.5
GSTM2	GSTM2	PPI	0.732142857142857
BUB3	BUB1B	PPI	0.535714285714286
CD44	CD44	PPI	0.642857142857143
TRIM11	TRIM11	PPI	0.696428571428571
UHMK1	STMN1	PPI	0.589285714285714
PTGS2	PTGS2	PPI	0.910714285714286
SMURF2	TFPI2	PPI	0.696428571428571
ANGPT1	ANGPT1	PPI	0.553571428571429
CALR	APOB	PPI	0.5
DDX3Y	SHBG	PPI	0.75
MCM8	MCM4	PPI	0.589285714285714
CDKN3	CDKN3	PPI	0.892857142857143
NCOR1	NCOR1	PPI	0.732142857142857
C7	CLU	PPI	0.553571428571429
CDKN2A	AHNAK	PPI	0.517857142857143
STAT1	CXCR4	PPI	0.678571428571429
PTPRC	JAK1	PPI	0.625
MASP2	FCN2	PPI	0.75
CXCL12	CD4	PPI	0.571428571428571
IGFBP3	COL1A1	PPI	0.625
GNAO1	GNAI1	PPI	0.5
SMURF2	SMAD5	PPI	0.517857142857143
RGS4	ERBB3	PPI	0.535714285714286
TMED2	COPA	PPI	0.553571428571429
DAZAP2	DAZAP2	PPI	0.5
EGFR	MET	PPI	0.5
JUNB	JUNB	PPI	0.535714285714286
C10orf18	C10orf18	PPI	0.625
S100P	VIL2	PPI	0.535714285714286
ALCAM	ALCAM	PPI	0.5
ADAMTS1	VCAN	PPI	0.714285714285714
PTPRC	INSR	PPI	0.571428571428571
IGFALS	PDCD6	PPI	0.589285714285714
DLG1	DLG1	PPI	0.642857142857143
ESR1	MLL2	PPI	0.625
NDC80	ZWINT	PPI	0.821428571428571
JUN	FOS	PPI	0.607142857142857
CDA	KPNA2	PPI	0.5
FPR1	SAA1	PPI	0.571428571428571
TAP1	ESR1	PPI	0.553571428571429
TNFRSF10D	TNFRSF10D	PPI	0.803571428571429
EGFR	DCN	PPI	0.553571428571429
NR1H4	ESR1	PPI	0.625
THBS1	COL3A1	PPI	0.767857142857143
HMMR	CALM1	PPI	0.5
NIN	AURKA	PPI	0.517857142857143
DPP4	DPP4	PPI	0.696428571428571
TERF1	TERF1	PPI	0.571428571428571
VCAN	VCAN	PPI	0.910714285714286
NCOA3	NCOA3	PPI	0.785714285714286
NAB1	EGR1	PPI	0.535714285714286
PEA15	PLD1	PPI	0.589285714285714
CDC2	HMGA1	PPI	0.517857142857143
ATR	RHEB	PPI	0.571428571428571
KLF6	EHMT2	PPI	0.517857142857143
CD74	HLA-DQA1	PPI	0.589285714285714
PTGS1	PTGS1	PPI	0.625
ATOX1	ATOX1	PPI	0.625
CCL21	VCAN	PPI	0.678571428571429
SOCS3	LEPR	PPI	0.696428571428571
IL1RAP	PRPF40A	PPI	0.517857142857143
C2	MASP1	PPI	0.553571428571429
CDC2	CALD1	PPI	0.517857142857143
CBFA2T2	NCOR1	PPI	0.625
S100A8	S100A8	PPI	0.946428571428571
IL6ST	ERBB3	PPI	0.589285714285714
TGM2	FN1	PPI	0.75
IFNAR1	PTPRC	PPI	0.625
PLA2G2A	DCN	PPI	0.660714285714286
CRLS1	MCM6	PPI	0.571428571428571
TBL1X	CTNNB1	PPI	0.553571428571429
PPP2R1B	HSPD1	PPI	0.553571428571429
CD47	THBS1	PPI	0.5
DBH	DBH	PPI	0.857142857142857
SERPINE1	SERPINE1	PPI	0.910714285714286
LCN2	LCN2	PPI	0.642857142857143
ITGA4	FN1	PPI	0.535714285714286
DCN	COL14A1	PPI	0.678571428571429
CTNNA1	CDH1	PPI	0.553571428571429
PPP2R1B	CFTR	PPI	0.535714285714286
EGFR	VIL2	PPI	0.517857142857143
DCN	COL1A2	PPI	0.625
CDC20	BUB1B	PPI	0.660714285714286
PRKDC	JUN	PPI	0.5
ASS1	ASS1	PPI	0.678571428571429
CDC37L1	CDC37L1	PPI	0.589285714285714
HBB	HBB	PPI	0.928571428571429
IL1R1	IL1B	PPI	0.589285714285714
CADM1	CADM1	PPI	0.767857142857143
EGFR	HGS	PPI	0.5
CDKN2C	CDK6	PPI	0.696428571428571
APLP2	APLP2	PPI	0.571428571428571
EGFR	CTNNB1	PPI	0.571428571428571
SKAP2	SKAP2	PPI	0.607142857142857
GADD45B	CCNB1	PPI	0.625
CDC2	CDC2	PPI	0.821428571428571
SMARCA4	ESR1	PPI	0.767857142857143
ITCH	ITCH	PPI	0.732142857142857
GLUD2	GLUD2	PPI	0.892857142857143
ASPA	ASPA	PPI	0.714285714285714
VCAN	CD44	PPI	0.589285714285714
GPC3	IGF2	PPI	0.75
BCHE	BCHE	PPI	0.910714285714286
ACLY	ACLY	PPI	0.678571428571429
BIRC4	BIRC4	PPI	0.5
DDEF1	PTK2	PPI	0.553571428571429
VIL2	CD44	PPI	0.517857142857143
ETS2	SMARCA4	PPI	0.696428571428571
SYNC1	DTNA	PPI	0.642857142857143
TFRC	TFRC	PPI	0.839285714285714
UBQLN4	UBQLN4	PPI	0.589285714285714
SMAD4	SMAD4	PPI	0.517857142857143
NEK2	NDC80	PPI	0.821428571428571
CCL2	CCL2	PPI	0.732142857142857
TLR3	TLR3	PPI	0.517857142857143
JUN	JUN	PPI	0.642857142857143
TMED2	GOLGA2	PPI	0.535714285714286
TAF15	SF1	PPI	0.607142857142857
RECQL	RECQL	PPI	0.607142857142857
E2F3	CCNA2	PPI	0.678571428571429
TRRAP	ESR1	PPI	0.535714285714286
JUN	EGR1	PPI	0.607142857142857
HBB	HBA2	PPI	0.839285714285714
CDC2	GOLGA2	PPI	0.553571428571429
THBS1	CD36	PPI	0.696428571428571
NCOA2	ESR1	PPI	0.678571428571429
TKT	TKT	PPI	0.660714285714286
SYTL4	RAB27A	PPI	0.571428571428571
CDH1	CDH1	PPI	0.732142857142857
GNMT	GNMT	PPI	0.696428571428571
ALDH2	ALDH2	PPI	0.5
TAP1	HLA-F	PPI	0.553571428571429
PSPH	PSPH	PPI	0.910714285714286
NFIX	NFIX	PPI	0.660714285714286
JUN	ESR1	PPI	0.571428571428571
RGS5	GNAO1	PPI	0.696428571428571
DPP4	PTPRC	PPI	0.625
MT1G	SHBG	PPI	0.714285714285714
C1S	C1R	PPI	0.5
KCNN2	CALM1	PPI	0.571428571428571
MUT	MUT	PPI	0.589285714285714
CDC2	BUB1	PPI	0.589285714285714
PHLDA1	HSPA4	PPI	0.767857142857143
BCL2L10	BCL2L10	PPI	0.571428571428571
MAPK1	MAP2K1	PPI	0.535714285714286
GCHFR	GCHFR	PPI	0.678571428571429
CFTR	VIL2	PPI	0.5
IL8RB	GNA14	PPI	0.785714285714286
KPNB1	IGFBP3	PPI	0.553571428571429
CCL23	CCR1	PPI	0.553571428571429
TRAF5	TRAF5	PPI	0.767857142857143
IGFALS	IGFBP3	PPI	0.892857142857143
MCM5	CDKN2A	PPI	0.571428571428571
TBXA2R	TBXA2R	PPI	0.660714285714286
TAX1BP1	TAX1BP1	PPI	0.517857142857143
IGF2	IGFBP3	PPI	0.803571428571429
ETS1	ETS1	PPI	0.589285714285714
EFNB2	HOMER1	PPI	0.517857142857143
ALDOB	ALDOB	PPI	0.714285714285714
PPOX	PPOX	PPI	0.5
EGR1	CDKN2A	PPI	0.714285714285714
GOPC	GOPC	PPI	0.571428571428571
PLA2G2A	PLA2G2A	PPI	0.803571428571429
GSTM2	GSTM1	PPI	0.732142857142857
CAT	CAT	PPI	0.857142857142857
HGS	UBQLN4	PPI	0.5
SOCS3	EGFR	PPI	0.553571428571429
EPB41L3	CNTNAP2	PPI	0.5
KRAS	FNTB	PPI	0.517857142857143
PCBP2	PCBP2	PPI	0.767857142857143
NDC80	MAD2L1	PPI	0.714285714285714
CSNK1A1	YWHAZ	PPI	0.5
YWHAE	TOP2A	PPI	0.571428571428571
LAPTM5	NEDD4L	PPI	0.5
MAPKAPK2	MAPKAPK2	PPI	0.517857142857143
IVD	IVD	PPI	0.535714285714286
MCL1	BCL2L1	PPI	0.5
IGFBP3	FN1	PPI	0.803571428571429
ZBTB16	ZBTB16	PPI	0.678571428571429
MDH1	GPD1	PPI	0.5
CCL5	VCAN	PPI	0.625
FAT	HOMER1	PPI	0.75
FNBP1	FNBP1	PPI	0.589285714285714
FEZ1	SMC3	PPI	0.607142857142857
CXCL2	CXCL2	PPI	0.803571428571429
FOXP1	FOXP1	PPI	0.732142857142857
SOX13	SOX13	PPI	0.767857142857143
EGFR	MAP2K1	PPI	0.571428571428571
CLIC4	YWHAZ	PPI	0.5
IL8	IL8RB	PPI	0.928571428571429
PLD1	PLD1	PPI	0.982142857142857
SOX6	SOX6	PPI	0.642857142857143
AURKA	NUF2	PPI	0.821428571428571
FNBP4	KHDRBS1	PPI	0.517857142857143
IGHD	IGHD	PPI	0.642857142857143
SSX2IP	SSX2IP	PPI	0.571428571428571
GZMA	GZMA	PPI	0.517857142857143
TCF4	ASCL1	PPI	0.553571428571429
CCL2	VCAN	PPI	0.642857142857143
PRKDC	HMGB2	PPI	0.625
CDC42BPA	CDC42BPA	PPI	0.803571428571429
TCF4	IL8	TRI	0.589285714285714
NR5A2	CETP	TRI	0.642857142857143
STAT1	FOS	TRI	0.785714285714286
FOS	TIMP1	TRI	0.642857142857143
BHLHB2	BHLHB2	TRI	0.589285714285714
MYC	MYC	TRI	0.5
KLF13	HBG1	TRI	0.553571428571429
STAT1	IFITM1	TRI	0.535714285714286
ATF3	ATF3	TRI	0.821428571428571
FOS	JUN	TRI	0.607142857142857
ETS1	LPAL2	TRI	0.589285714285714
FOS	MT2A	TRI	0.714285714285714
JUN	CCL5	TRI	0.5
ETS2	CDC2	TRI	0.607142857142857
JUN	FN1	TRI	0.535714285714286
EGR2	ABCB1	TRI	0.571428571428571
FOS	HBA1	TRI	0.821428571428571
NFIC	FN1	TRI	0.5
ETS2	VWF	TRI	0.660714285714286
NR5A2	CYP7A1	TRI	0.571428571428571
NR5A2	ALB	TRI	0.571428571428571
NFIC	HBA1	TRI	0.5
STAT1	CCND1	TRI	0.607142857142857
AR	AR	TRI	0.5
ESR1	TF	TRI	0.553571428571429
KLF11	HBE1	TRI	0.535714285714286
STAT1	CYBB	TRI	0.535714285714286
FLI1	COL1A2	TRI	0.589285714285714
LEF1	CCND1	TRI	0.571428571428571
KLF13	CYP1A1	TRI	0.517857142857143
EGR1	EGFR	TRI	0.589285714285714
STAT1	ISG15	TRI	0.535714285714286
ETS1	VWF	TRI	0.5
ESR1	FOS	TRI	0.803571428571429
EGR1	ABCB1	TRI	0.553571428571429
FOS	SERPINE1	TRI	0.875
FLI1	EGR1	TRI	0.642857142857143
TCF7L2	CCND1	TRI	0.553571428571429
JUN	SELE	TRI	0.517857142857143
STAT1	CCL2	TRI	0.607142857142857
LEF1	LEF1	TRI	0.839285714285714
PBX1	UGT2B17	TRI	0.517857142857143
NR1I3	CYP2C9	TRI	0.696428571428571
EGR1	EGR1	TRI	0.910714285714286
JUN	JUN	TRI	0.642857142857143
PPARA	PTGS2	TRI	0.571428571428571
FOS	HLA-DRA	TRI	0.589285714285714
ATF3	SELE	TRI	0.625
C1orf107	FOS	TRI	0.589285714285714
STAT1	STAT1	TRI	0.839285714285714
FOS	FOS	TRI	0.928571428571429
PPARA	LPAL2	TRI	0.625
NFIC	HBB	TRI	0.535714285714286
ETS2	CCND1	TRI	0.517857142857143
ETS2	MSR1	TRI	0.5
JUN	ATF3	TRI	0.553571428571429
FOS	CCL4	TRI	0.678571428571429

## Sheet: BCLC stage B HCC
Protein1	Protein2	Iteraction type	Frequence
ETS2	NCOR1	PPI	0.714285714285714
C2	C5	PPI	0.571428571428571
AR	CDK6	PPI	0.571428571428571
SMAD3	SMAD3	PPI	0.714285714285714
SFRS2IP	SFRS3	PPI	0.571428571428571
APOA1	APOF	PPI	0.571428571428571
CLU	PON1	PPI	0.571428571428571
TPR	NUP153	PPI	0.571428571428571
PLSCR4	PLSCR1	PPI	0.571428571428571
IL6R	IL6R	PPI	0.714285714285714
NDC80	NDC80	PPI	0.857142857142857
SERPINE1	IGFBP5	PPI	0.571428571428571
SP1	NCOR1	PPI	0.571428571428571
SPEN	NCOR1	PPI	0.714285714285714
CYBB	NCF2	PPI	0.714285714285714
ALB	AGA	PPI	0.857142857142857
DGKZ	LEPR	PPI	0.571428571428571
SGOL2	PPP2R1B	PPI	0.714285714285714
TPD52L1	TPD52L1	PPI	0.714285714285714
SMAD4	LEF1	PPI	0.571428571428571
FN1	COL1A2	PPI	0.571428571428571
CXCL12	FN1	PPI	0.571428571428571
CCNB2	CDC2	PPI	0.714285714285714
CASP1	PSEN1	PPI	0.571428571428571
RASSF5	KRAS	PPI	0.714285714285714
MDM4	TP53	PPI	0.571428571428571
SLC9A3R2	PDPK1	PPI	0.571428571428571
HERC5	CCNA2	PPI	0.571428571428571
SMAD4	SQSTM1	PPI	0.571428571428571
BHLHB2	BHLHB2	PPI	0.571428571428571
ATN1	LENG8	PPI	0.571428571428571
PRPF40A	PRPF40A	PPI	0.714285714285714
ESR1	ESR1	PPI	0.714285714285714
NUB1	PSMD4	PPI	0.571428571428571
GLS2	PAG1	PPI	0.571428571428571
CSNK1A1	TP53	PPI	0.714285714285714
CRP	CRP	PPI	0.857142857142857
YWHAB	TSC2	PPI	0.714285714285714
EGFR	SCAMP1	PPI	0.571428571428571
DPP4	CXCL10	PPI	0.714285714285714
TBL1XR1	NCOR1	PPI	0.714285714285714
PPARBP	PPARBP	PPI	0.571428571428571
NEDD4	NEDD4	PPI	0.714285714285714
CD74	CD74	PPI	0.714285714285714
MID1	MID1	PPI	0.857142857142857
SFRS3	PCBP2	PPI	0.571428571428571
GHR	GHR	PPI	0.714285714285714
TGM2	SPARC	PPI	0.571428571428571
HSP90AB1	HSP90AB1	PPI	0.714285714285714
PPID	SMURF2	PPI	0.571428571428571
SMARCA4	TMF1	PPI	0.571428571428571
ATF3	ATF3	PPI	0.857142857142857
SOCS3	IL6ST	PPI	0.571428571428571
TACSTD1	TACSTD1	PPI	0.571428571428571
IL1RAP	IL1B	PPI	1
CLDN1	CLDN1	PPI	0.714285714285714
SKP1A	TBL1X	PPI	0.571428571428571
CSF2RB	PRKCB1	PPI	0.571428571428571
SMAD3	SPTBN1	PPI	0.571428571428571
TP53	CDKN2C	PPI	0.571428571428571
UGP2	UGP2	PPI	0.714285714285714
ATF1	ATF1	PPI	0.714285714285714
PTN	PTN	PPI	0.571428571428571
FCGR2B	APCS	PPI	0.571428571428571
PRSS23	RACGAP1	PPI	0.714285714285714
IGFBP3	CD44	PPI	0.714285714285714
CCNB1	PBK	PPI	0.714285714285714
PSEN1	CDH1	PPI	0.571428571428571
GRB10	EGFR	PPI	0.714285714285714
STAT1	MDK	PPI	0.571428571428571
CDH1	CTNNB1	PPI	0.714285714285714
RACGAP1	RND2	PPI	0.571428571428571
STRAP	STRAP	PPI	0.571428571428571
F5	SERPINA3	PPI	0.571428571428571
SQSTM1	SQSTM1	PPI	0.714285714285714
CXCR4	ADRBK2	PPI	0.571428571428571
EGFR	S100A9	PPI	0.714285714285714
GRB10	MAP2K1	PPI	0.857142857142857
TP53	CCNA2	PPI	0.571428571428571
ERBB3	EGFR	PPI	0.714285714285714
PDPK1	PRSS23	PPI	0.571428571428571
SKAP1	LYN	PPI	0.571428571428571
AKT2	AKT2	PPI	0.714285714285714
HLA-DRB1	HLA-DRA	PPI	0.571428571428571
RAB27A	GDI1	PPI	0.571428571428571
CDK6	ATXN1	PPI	0.714285714285714
CDC2	UBE2A	PPI	0.571428571428571
CDH1	RRM2	PPI	0.714285714285714
BGN	APOB	PPI	0.571428571428571
NR1I3	MAP4	PPI	0.571428571428571
ATG10	ATG12	PPI	0.571428571428571
PIAS1	PIAS1	PPI	0.571428571428571
GNG2	SMURF2	PPI	0.571428571428571
C5	C5	PPI	0.714285714285714
TBX3	TBX3	PPI	0.571428571428571
PECAM1	CTNNB1	PPI	0.571428571428571
SNX4	INSR	PPI	0.571428571428571
S100A9	S100A9	PPI	1
PLG	S100A10	PPI	0.571428571428571
USP7	ATXN1	PPI	0.571428571428571
DVL3	CTNNB1	PPI	0.571428571428571
FOS	LMNA	PPI	0.714285714285714
TPM1	JUN	PPI	0.571428571428571
THBS1	SPARC	PPI	0.571428571428571
SMARCA4	ARID1A	PPI	0.571428571428571
HSPA8	CXCR4	PPI	0.571428571428571
TCF12	ID1	PPI	0.571428571428571
DLG1	VIL2	PPI	0.571428571428571
PRPF40A	SNRP70	PPI	0.571428571428571
EZH2	SUZ12	PPI	0.571428571428571
NEDD9	SMAD3	PPI	0.714285714285714
HAMP	SLC40A1	PPI	0.571428571428571
GSTM4	GSTM4	PPI	0.714285714285714
KRAS	CALM1	PPI	0.571428571428571
ASL	ASL	PPI	0.857142857142857
ETS2	GATA3	PPI	0.571428571428571
GNB2L1	INSR	PPI	0.571428571428571
FGA	FGA	PPI	0.571428571428571
TGFBR1	CD44	PPI	0.571428571428571
TACC1	TACC1	PPI	0.857142857142857
PECAM1	PECAM1	PPI	0.571428571428571
STK4	STK4	PPI	0.571428571428571
PAK2	HCK	PPI	0.571428571428571
F5	F5	PPI	1
DIP2A	DAB2	PPI	0.571428571428571
JUB	CTNNA1	PPI	0.571428571428571
PLA2G2A	VCAN	PPI	0.714285714285714
SQSTM1	MAP2K5	PPI	0.571428571428571
CXCR4	PTPRC	PPI	0.571428571428571
LYN	CSF2RB	PPI	0.571428571428571
KPNB1	TP53	PPI	0.571428571428571
SH3KBP1	SOS1	PPI	0.714285714285714
BMP1	COL1A1	PPI	0.714285714285714
BNIP3	CD47	PPI	0.571428571428571
YWHAB	C1QBP	PPI	0.571428571428571
PPARA	PPARA	PPI	0.571428571428571
MLL	MLL	PPI	0.571428571428571
ERBB3	SOS1	PPI	0.857142857142857
SLAMF7	SLAMF7	PPI	0.857142857142857
LOX	LOX	PPI	0.571428571428571
SMAD4	SPTBN1	PPI	0.714285714285714
DCTN1	DST	PPI	0.571428571428571
NBR1	NBR1	PPI	0.857142857142857
PRDX4	PRDX4	PPI	0.571428571428571
S100P	S100P	PPI	0.857142857142857
SRGN	UBQLN4	PPI	0.714285714285714
CXCL12	CXCL12	PPI	1
CLU	PRNP	PPI	0.571428571428571
SLC4A4	CA2	PPI	0.714285714285714
PTPRM	PTPRM	PPI	0.714285714285714
ANKRD11	NCOA2	PPI	0.571428571428571
ETS1	NCOR1	PPI	0.571428571428571
ARL5A	KPNA2	PPI	0.571428571428571
AHCYL1	ITPR1	PPI	0.571428571428571
TPM2	TPM1	PPI	0.714285714285714
ESR1	SOS1	PPI	0.714285714285714
UBQLN4	CCDC14	PPI	0.571428571428571
DAB2	TGFBR1	PPI	0.571428571428571
PDIA3	CALR	PPI	0.714285714285714
CCR1	STAT1	PPI	0.714285714285714
SKP1A	FBXO8	PPI	0.571428571428571
LYN	FCGR2B	PPI	0.571428571428571
VWF	COL1A2	PPI	1
ZBTB16	ESR1	PPI	0.571428571428571
CSF2RB	CSF2RB	PPI	0.714285714285714
MIB1	DAB2	PPI	0.714285714285714
CDC2	PBK	PPI	0.714285714285714
TP53	ZNF24	PPI	0.571428571428571
FCGR2B	LY6E	PPI	1
COL1A2	APP	PPI	0.571428571428571
TP53	TOP2A	PPI	0.714285714285714
S100A9	S100A8	PPI	1
ANXA13	NEDD4	PPI	0.571428571428571
KPNB1	KPNB1	PPI	0.571428571428571
SRGN	ALB	PPI	0.714285714285714
RACGAP1	CHN2	PPI	0.714285714285714
ITGA4	VCAN	PPI	0.714285714285714
NDRG1	MME	PPI	0.571428571428571
JAG1	THBS1	PPI	0.571428571428571
PCBP2	PRPF40A	PPI	0.571428571428571
FYB	LCP2	PPI	0.714285714285714
ENPEP	ENPEP	PPI	0.571428571428571
CADM1	CASK	PPI	0.571428571428571
SELL	VIL2	PPI	0.571428571428571
H2AFZ	H2AFZ	PPI	0.571428571428571
CLDN1	BRD4	PPI	0.571428571428571
FBN1	VCAN	PPI	0.571428571428571
CDC2	ECT2	PPI	0.571428571428571
C1S	C1S	PPI	0.571428571428571
CBS	CBS	PPI	0.714285714285714
HMMR	CD44	PPI	0.571428571428571
PLDN	PLDN	PPI	0.571428571428571
KCTD5	KCTD5	PPI	0.571428571428571
SMAD3	EPAS1	PPI	0.571428571428571
THBS1	DCN	PPI	0.857142857142857
SERPINE2	COL4A1	PPI	0.714285714285714
IL6ST	HCK	PPI	0.571428571428571
SCAMP1	SCAMP1	PPI	0.714285714285714
MASP1	MBL2	PPI	0.571428571428571
PLEK	PLEK	PPI	0.714285714285714
PPID	HSP90AB1	PPI	0.571428571428571
SORBS2	FLOT1	PPI	0.571428571428571
NDC80	KLHL12	PPI	0.571428571428571
LYST	KPNB1	PPI	0.571428571428571
TP53	TP53	PPI	0.714285714285714
SKIL	NCOR1	PPI	0.571428571428571
TLE1	HLA-DQA1	PPI	0.714285714285714
EXOSC4	EXOSC4	PPI	0.714285714285714
CHI3L1	CHI3L1	PPI	0.857142857142857
DPP4	CXCL12	PPI	0.857142857142857
TP53	SCAMP1	PPI	0.571428571428571
SPP1	IGFBP5	PPI	0.571428571428571
MAPKAPK2	TSC2	PPI	0.571428571428571
FOS	JUNB	PPI	0.857142857142857
CDH11	CTNNB1	PPI	0.571428571428571
SETDB1	OLFML3	PPI	0.571428571428571
KLF6	SP1	PPI	0.571428571428571
PPARBP	ESR1	PPI	0.571428571428571
SPARCL1	PRNP	PPI	0.857142857142857
CASP1	IL1B	PPI	0.857142857142857
CBLB	GORASP2	PPI	0.571428571428571
ITCH	ATN1	PPI	0.714285714285714
TNFRSF19	TRAF5	PPI	0.714285714285714
CD47	FAS	PPI	0.714285714285714
SATB1	SATB1	PPI	0.571428571428571
TARDBP	SETDB1	PPI	0.571428571428571
KPNA2	TXNIP	PPI	0.857142857142857
SOCS2	EPOR	PPI	1
PRKCB1	ITGB2	PPI	0.714285714285714
CTSB	IGF1	PPI	0.571428571428571
RANBP9	ITGB2	PPI	0.571428571428571
NEDD9	CDH1	PPI	0.714285714285714
RABGGTB	RABGGTB	PPI	0.571428571428571
SMAD4	GPNMB	PPI	0.571428571428571
CUGBP1	CUGBP1	PPI	0.571428571428571
DPP4	CD4	PPI	0.571428571428571
ATF7IP	SETDB1	PPI	0.571428571428571
SRGAP2	ROBO1	PPI	0.714285714285714
CCL20	VCAN	PPI	0.714285714285714
SLC22A1	POU2AF1	PPI	0.571428571428571
CASP4	PSEN1	PPI	0.571428571428571
JAK1	STAT1	PPI	0.571428571428571
FOS	STAT1	PPI	0.714285714285714
CMYA5	CMYA5	PPI	0.571428571428571
SEC23A	SEC24B	PPI	0.571428571428571
GPLD1	APOA1	PPI	0.571428571428571
SMAD2	SMAD4	PPI	0.571428571428571
ITGA4	ITGA4	PPI	0.714285714285714
EGFR	STAT1	PPI	0.714285714285714
TK1	TP53	PPI	0.571428571428571
STOM	STOM	PPI	0.571428571428571
BICD2	BICD2	PPI	0.714285714285714
GLRX	NFIC	PPI	0.571428571428571
FEZ1	RAB3GAP2	PPI	0.571428571428571
STAT1	IFNGR1	PPI	0.571428571428571
C7	PLG	PPI	0.571428571428571
PDK4	PDK4	PPI	1
JUN	TOP1	PPI	0.714285714285714
MCM5	MCM3	PPI	0.714285714285714
CTSB	S100A10	PPI	0.571428571428571
BCL2L1	BCL2L1	PPI	0.714285714285714
CAP2	PRPF40A	PPI	0.714285714285714
THBS1	IGFBP5	PPI	0.571428571428571
PLG	CP	PPI	0.714285714285714
RANBP9	RANBP9	PPI	0.571428571428571
EGFR	AR	PPI	0.571428571428571
NUP153	KPNA2	PPI	0.571428571428571
LGALS3BP	LGALS3BP	PPI	0.714285714285714
PTPRC	PTPRC	PPI	0.857142857142857
SMARCA4	TP53	PPI	0.714285714285714
CSE1L	STAT1	PPI	0.571428571428571
COL14A1	CD44	PPI	0.571428571428571
NDRG1	HNRPU	PPI	0.571428571428571
MAL2	TPD52L1	PPI	0.571428571428571
MLH3	MLH3	PPI	0.571428571428571
ITGA9	ITGA9	PPI	0.571428571428571
DCLRE1C	PRKDC	PPI	0.571428571428571
CD8A	HLA-C	PPI	0.571428571428571
UBQLN4	NOTCH2NL	PPI	0.857142857142857
TNFAIP3	TNFAIP3	PPI	0.571428571428571
ADRA1A	RGS2	PPI	0.857142857142857
ATXN1	EIF1AY	PPI	0.714285714285714
CASP1	EGFR	PPI	0.571428571428571
RGS4	GNAO1	PPI	0.714285714285714
APCS	APCS	PPI	0.571428571428571
CD46	CD46	PPI	0.571428571428571
AR	AR	PPI	0.571428571428571
YWHAB	INSR	PPI	0.714285714285714
AGTR1	EGFR	PPI	0.571428571428571
PTK2	PTK2	PPI	0.571428571428571
C1QBP	C1QA	PPI	0.571428571428571
PTPRS	FEZ1	PPI	0.571428571428571
PKP2	CTNNB1	PPI	0.714285714285714
SMAD4	AR	PPI	0.571428571428571
HSP90AB1	ESR1	PPI	0.571428571428571
SP3	SP1	PPI	0.571428571428571
MMRN1	F5	PPI	0.857142857142857
PPP2R1B	CDC2	PPI	0.571428571428571
FHL2	CTNNB1	PPI	0.571428571428571
NEDD4	GRB10	PPI	0.714285714285714
GLDC	GLDC	PPI	0.714285714285714
ERBB3	NRG1	PPI	0.857142857142857
ESR1	HSPA4	PPI	0.571428571428571
COL4A1	COL4A1	PPI	0.714285714285714
UBE2Z	SMAD4	PPI	0.571428571428571
CD84	CD84	PPI	0.571428571428571
PKP2	PKP2	PPI	0.857142857142857
TNFRSF10A	TNFRSF10A	PPI	0.571428571428571
MAD2L1	CSF2RB	PPI	0.714285714285714
PON1	ALB	PPI	0.571428571428571
MAPK8IP3	KLC1	PPI	0.571428571428571
FHL2	FHL2	PPI	0.714285714285714
SF1	DDX17	PPI	0.571428571428571
GSTA4	GSTA4	PPI	0.857142857142857
SP1	SMAD4	PPI	0.714285714285714
ITGB2	ICAM1	PPI	0.571428571428571
ANP32A	PTPRC	PPI	0.571428571428571
SMURF2	SMAD3	PPI	0.714285714285714
AQP1	AQP1	PPI	0.571428571428571
SMURF2	SPG20	PPI	0.714285714285714
CDC2	PTTG1	PPI	0.714285714285714
HMOX1	HMOX1	PPI	0.714285714285714
TCF3	CALM3	PPI	0.571428571428571
FGB	CALR	PPI	0.571428571428571
CD4	CD4	PPI	0.714285714285714
KIF11	KIF11	PPI	0.714285714285714
SNRPB	SNRPB	PPI	0.571428571428571
YWHAB	SRRM2	PPI	0.714285714285714
TGFB1I1	PTK2	PPI	0.571428571428571
SKIL	SKIL	PPI	0.571428571428571
CDC2	DUT	PPI	0.714285714285714
IL1B	IL1B	PPI	1
RPE	RPE	PPI	0.571428571428571
CSNK1A1	TGFBR1	PPI	0.571428571428571
ITGB1BP1	KRIT1	PPI	0.571428571428571
SPEN	MBD3	PPI	0.571428571428571
SMAD3	AXIN2	PPI	0.571428571428571
FEZ1	PTN	PPI	0.571428571428571
MDH2	MDH2	PPI	0.571428571428571
CHD4	SMARCA4	PPI	0.714285714285714
SMURF2	DAB2	PPI	0.857142857142857
CCR1	CCL4	PPI	0.571428571428571
CALCRL	RAMP1	PPI	0.571428571428571
ESR1	SP1	PPI	0.571428571428571
ZNF397	ZNF397	PPI	0.571428571428571
SMAD2	SMAD2	PPI	0.714285714285714
PAK2	LYN	PPI	0.571428571428571
CDK6	CDK6	PPI	1
DEFB1	RIF1	PPI	0.571428571428571
TP53	TOP1	PPI	0.714285714285714
DAB2	CDC2	PPI	0.571428571428571
VIL2	CTNNB1	PPI	0.714285714285714
CCNB1	CDC2	PPI	0.714285714285714
PTPRC	SKAP1	PPI	0.857142857142857
GSTM4	TP53	PPI	0.571428571428571
AGTR1	ADRBK2	PPI	0.857142857142857
SPTBN1	ATF7IP	PPI	0.571428571428571
GMNN	MCM6	PPI	0.714285714285714
IFNAR1	FBXW11	PPI	0.571428571428571
SMURF2	TXNIP	PPI	0.857142857142857
MAP2K1	MAP2K1	PPI	0.857142857142857
MATN2	MATN2	PPI	0.571428571428571
FKBP1A	ITPR1	PPI	0.571428571428571
CXCR4	CXCR4	PPI	0.571428571428571
MAOA	MAOA	PPI	0.571428571428571
BNIP3	BNIP3	PPI	0.571428571428571
IL1RL1	IL33	PPI	0.714285714285714
PLSCR1	SLPI	PPI	0.571428571428571
VDAC3	DDX24	PPI	0.571428571428571
EGFR	CALM3	PPI	0.571428571428571
LEPR	LEPR	PPI	1
MDK	TSPAN1	PPI	0.571428571428571
ATN1	ATN1	PPI	0.714285714285714
TCF3	TCF3	PPI	0.571428571428571
MTUS1	MTUS1	PPI	0.714285714285714
PRKAR1A	PRPF40A	PPI	0.571428571428571
DAB2	MYO6	PPI	0.857142857142857
CD36	ITGA6	PPI	0.571428571428571
UBQLN4	PBXIP1	PPI	0.571428571428571
PFN2	PTPRS	PPI	0.571428571428571
RHOQ	WASL	PPI	0.714285714285714
CLU	APP	PPI	0.571428571428571
HSPA8	HSPA8	PPI	0.571428571428571
RRAS2	SMAD4	PPI	0.571428571428571
MAPKAPK2	LSP1	PPI	0.571428571428571
SP1	PRKDC	PPI	0.571428571428571
CLEC4M	CLEC4M	PPI	1
ZMYND11	NCOR1	PPI	0.571428571428571
ADH1A	ADH1A	PPI	0.571428571428571
FOSL2	JUNB	PPI	0.571428571428571
NCALD	NP	PPI	0.571428571428571
FCGR3B	APCS	PPI	0.571428571428571
HEY1	HEY1	PPI	0.571428571428571
SOCS2	GHR	PPI	0.714285714285714
PER3	SP1	PPI	0.571428571428571
RAB4A	SOD2	PPI	0.571428571428571
CA2	HSPD1	PPI	0.714285714285714
AKT2	TSC2	PPI	0.714285714285714
HLA-DMB	CD74	PPI	0.571428571428571
ARF1	DDEF1	PPI	0.571428571428571
VCAM1	VCAM1	PPI	0.571428571428571
SKIL	HIPK3	PPI	0.571428571428571
INSR	PTK2	PPI	0.571428571428571
JAK1	JAK1	PPI	0.571428571428571
CDKN2C	CDKN2A	PPI	0.857142857142857
THBS1	COL1A1	PPI	0.857142857142857
CDC2	RRM2	PPI	0.714285714285714
CLU	C9	PPI	0.571428571428571
TNPO1	TNPO1	PPI	0.571428571428571
LMNA	SMAD3	PPI	0.571428571428571
SOCS3	INSR	PPI	0.571428571428571
BGN	COL1A2	PPI	0.571428571428571
PLAUR	HCK	PPI	0.571428571428571
CD36	COL1A2	PPI	0.714285714285714
HBE1	HBA2	PPI	0.714285714285714
EPHA3	EPHA3	PPI	0.714285714285714
KHDRBS1	KHDRBS1	PPI	0.571428571428571
MNDA	TP53	PPI	0.571428571428571
CDC2	KIF11	PPI	0.714285714285714
PPID	HSPA8	PPI	0.571428571428571
MME	EDN1	PPI	0.571428571428571
ANGPTL3	ITGAV	PPI	0.571428571428571
CAMK2D	STAT1	PPI	0.571428571428571
PAPOLA	YWHAE	PPI	0.571428571428571
RAP2A	RAP2A	PPI	0.571428571428571
PTGS2	TP53	PPI	0.714285714285714
PPARA	FABP1	PPI	0.571428571428571
HSP90AB1	TP53	PPI	0.571428571428571
CTSD	IGFBP3	PPI	0.571428571428571
HGF	HGF	PPI	1
IL6ST	TLE1	PPI	0.714285714285714
GLS2	DLG1	PPI	0.571428571428571
SNTB2	SNTB2	PPI	0.571428571428571
TPR	IFI16	PPI	0.857142857142857
TOP1	TOP1	PPI	0.857142857142857
ATF7IP	COL4A2	PPI	0.571428571428571
RASGRP1	DGKZ	PPI	0.571428571428571
MCL1	MCL1	PPI	0.857142857142857
PRKAR2B	PRKAR2B	PPI	0.857142857142857
SGK	KPNA2	PPI	0.571428571428571
PDZK1	CFTR	PPI	0.571428571428571
GSTM4	MED31	PPI	0.571428571428571
TGFBR1	FKBP1A	PPI	0.571428571428571
THBS3	THBS3	PPI	0.714285714285714
HSPD1	HSPD1	PPI	0.714285714285714
KLC1	KLC1	PPI	0.571428571428571
MBD3	RBBP4	PPI	0.571428571428571
HBD	HBD	PPI	0.857142857142857
GGA1	SORL1	PPI	0.714285714285714
GADD45B	CDC2	PPI	0.571428571428571
RORA	RORA	PPI	0.571428571428571
PLG	F2RL1	PPI	0.571428571428571
IGHM	PTK2	PPI	0.571428571428571
MTMR2	MTMR2	PPI	0.571428571428571
RBBP4	SP1	PPI	0.571428571428571
PPARGC1A	ESR1	PPI	0.571428571428571
KPNA2	RECQL	PPI	0.714285714285714
TGM2	TGM2	PPI	0.857142857142857
SMAD3	CTNNB1	PPI	0.571428571428571
GNB2L1	IFNAR1	PPI	0.571428571428571
MSN	MSN	PPI	0.714285714285714
ENAH	ENAH	PPI	0.571428571428571
SLC1A2	SLC1A2	PPI	0.857142857142857
RPL5	EIF5A	PPI	0.571428571428571
CENPF	CENPF	PPI	0.857142857142857
ERBB3	RASA4	PPI	0.571428571428571
PCSK6	PCSK6	PPI	1
FBXW11	FBXW11	PPI	0.571428571428571
CDK2	CDK2	PPI	0.571428571428571
KHK	KHK	PPI	0.571428571428571
SOS1	SOS1	PPI	1
RGS2	GNAS	PPI	0.714285714285714
SMAD3	SMAD4	PPI	0.571428571428571
F11R	F11R	PPI	0.571428571428571
NFAT5	NFAT5	PPI	0.571428571428571
ARG1	ARG2	PPI	0.571428571428571
LHX2	RNF12	PPI	0.571428571428571
HSPA8	APOB	PPI	0.571428571428571
GNAS	GNAS	PPI	0.714285714285714
ICAM1	ICAM1	PPI	0.571428571428571
HBA2	HBA2	PPI	0.857142857142857
DCN	COL4A1	PPI	0.571428571428571
MKI67	MKI67	PPI	0.571428571428571
HBG2	HBG2	PPI	0.857142857142857
RAB1A	RFK	PPI	0.571428571428571
YWHAB	RACGAP1	PPI	0.714285714285714
HRASLS3	UBQLN4	PPI	0.857142857142857
RANBP9	MET	PPI	0.571428571428571
BAG1	MET	PPI	0.571428571428571
USP7	USP7	PPI	0.571428571428571
SETDB1	SULT1E1	PPI	0.571428571428571
DLG1	MYO6	PPI	0.571428571428571
SFRS2IP	PSEN1	PPI	0.571428571428571
SERPINA3	SERPINA3	PPI	0.571428571428571
FAS	CALM1	PPI	0.571428571428571
TNFRSF11B	THBS1	PPI	0.857142857142857
CYP2C9	POR	PPI	0.571428571428571
ARIH1	PLD1	PPI	0.714285714285714
IGFALS	IGF1	PPI	0.714285714285714
SOD2	SOD2	PPI	0.857142857142857
BHMT	BHMT	PPI	0.571428571428571
PLG	CXCL2	PPI	0.571428571428571
CD47	PTK2	PPI	0.571428571428571
C1R	C1QB	PPI	0.571428571428571
PFN2	PFN2	PPI	0.714285714285714
MBL2	MBL2	PPI	0.571428571428571
ANPEP	ANPEP	PPI	0.571428571428571
NLN	NTS	PPI	0.714285714285714
SMAD2	INSR	PPI	0.571428571428571
SMURF2	SF3A2	PPI	0.714285714285714
OGT	OGT	PPI	0.714285714285714
BRWD1	SMARCA4	PPI	0.571428571428571
ATXN1	FAM48A	PPI	0.571428571428571
SERPINE2	COL4A2	PPI	0.714285714285714
SMURF2	LAPTM5	PPI	0.714285714285714
EPOR	EPO	PPI	0.571428571428571
DHX30	NCOR1	PPI	0.571428571428571
NCF2	S100A8	PPI	0.857142857142857
PKP2	DSG1	PPI	0.571428571428571
ATF7IP	SMAD4	PPI	0.714285714285714
SERPINB9	C14orf1	PPI	0.571428571428571
SELL	MSN	PPI	0.571428571428571
ATN1	ZMYND8	PPI	0.714285714285714
HRAS	SOS1	PPI	0.571428571428571
PDCD6	SH3KBP1	PPI	0.571428571428571
IGF2	IGFBP6	PPI	0.571428571428571
PRMT2	ESR1	PPI	0.571428571428571
PFN2	PLAUR	PPI	0.714285714285714
CTH	CTH	PPI	0.571428571428571
GADD45B	ESR1	PPI	0.571428571428571
BAT1	BAT1	PPI	0.571428571428571
RELN	RELN	PPI	0.571428571428571
NRBF2	PPARA	PPI	0.571428571428571
ATXN1	UBAP2L	PPI	0.571428571428571
HSPA4	PRSS23	PPI	0.571428571428571
PRKDC	PRKDC	PPI	0.714285714285714
GSTM4	TLE1	PPI	0.571428571428571
ANP32A	ATXN1	PPI	0.571428571428571
GMNN	HOXA7	PPI	0.714285714285714
RDX	VIL2	PPI	0.571428571428571
NEDD9	NEDD9	PPI	0.857142857142857
CYP1A2	POR	PPI	0.714285714285714
PRPF40A	SRPK2	PPI	0.571428571428571
JARID1A	ESR1	PPI	0.714285714285714
SPTAN1	PRKCB1	PPI	0.571428571428571
IL6ST	IL6ST	PPI	0.857142857142857
PCOLCE	COL3A1	PPI	0.714285714285714
TRA@	TRA@	PPI	0.571428571428571
IFITM1	IFITM1	PPI	0.571428571428571
DCPS	DCPS	PPI	0.571428571428571
TP53	IFI16	PPI	0.714285714285714
PLEK	TGFBR1	PPI	0.571428571428571
BIRC5	BIRC5	PPI	0.714285714285714
AGXT2L2	AGXT2L2	PPI	0.571428571428571
PPID	SLC25A4	PPI	0.571428571428571
IFNGR1	IFNGR1	PPI	0.714285714285714
EPHB2	FOS	PPI	0.571428571428571
MCM5	MCM7	PPI	0.571428571428571
THBS1	COL5A1	PPI	0.714285714285714
NCOA2	CTNNB1	PPI	0.571428571428571
INSR	KHDRBS1	PPI	0.571428571428571
C1QC	C1QA	PPI	0.571428571428571
MET	MET	PPI	0.714285714285714
CD74	HLA-DQB1	PPI	0.714285714285714
FAS	VIL2	PPI	0.571428571428571
ATF3	FGFR3	PPI	0.571428571428571
BMP1	ADRA1A	PPI	0.714285714285714
TLE1	TLE1	PPI	0.857142857142857
KLHL12	MED28	PPI	0.571428571428571
ASXL2	PRPF40A	PPI	0.571428571428571
CD53	CD9	PPI	0.571428571428571
CCR1	CCR1	PPI	0.857142857142857
GBP1	GBP1	PPI	0.857142857142857
CD4	TFRC	PPI	0.571428571428571
F11	F11	PPI	0.857142857142857
ITGB2	ICAM2	PPI	0.571428571428571
HSPA8	CYCS	PPI	0.571428571428571
VWF	VWF	PPI	1
PTPRC	LYN	PPI	0.571428571428571
CFHR4	CFHR4	PPI	0.714285714285714
CDKN2A	GMNN	PPI	0.857142857142857
UBD	NUB1	PPI	0.571428571428571
MAP3K13	MAP3K13	PPI	0.571428571428571
CCL19	CCL19	PPI	0.571428571428571
APOA1	CETP	PPI	0.571428571428571
EBPL	EBPL	PPI	0.571428571428571
CCL5	CCL5	PPI	1
SMURF2	TGFBR1	PPI	0.571428571428571
ABCA1	DLG5	PPI	0.571428571428571
MET	HGF	PPI	0.714285714285714
ZHX2	ZHX2	PPI	0.714285714285714
FOS	SMAD3	PPI	0.714285714285714
DPT	DCN	PPI	0.857142857142857
CDKN2A	HSP90AB1	PPI	0.571428571428571
FBLN1	SMAD4	PPI	0.714285714285714
STAT1	JUN	PPI	0.571428571428571
EGFR	PLD1	PPI	0.714285714285714
THBS1	FGA	PPI	0.571428571428571
THRSP	THRSP	PPI	0.857142857142857
RANBP9	TFRC	PPI	0.571428571428571
MCM4	MCM6	PPI	0.571428571428571
TPX2	TPX2	PPI	0.571428571428571
TPM2	TPM2	PPI	0.714285714285714
AKR1C1	AKR1C1	PPI	0.571428571428571
DLAT	PDK4	PPI	0.571428571428571
NMT2	TP53	PPI	0.571428571428571
RPS6KC1	RPS6KC1	PPI	0.571428571428571
BCL2L1	CRYAA	PPI	0.571428571428571
SMAD2	SP1	PPI	0.571428571428571
DFFB	DFFB	PPI	0.571428571428571
RNF130	TGFBR1	PPI	0.571428571428571
CTSB	SLPI	PPI	0.714285714285714
ETS2	ETS2	PPI	1
BMPR2	BMPR2	PPI	0.571428571428571
ATXN1	SPEN	PPI	0.571428571428571
SMC3	KIFAP3	PPI	0.571428571428571
CAMK2D	CREM	PPI	0.571428571428571
CSNK1A1	CREM	PPI	0.571428571428571
DCLRE1C	NBN	PPI	0.571428571428571
CDK6	CDKN2A	PPI	0.857142857142857
GNB2L1	EPOR	PPI	0.571428571428571
FBLN1	VCAN	PPI	0.857142857142857
IL8	IL8	PPI	1
SQSTM1	NBR1	PPI	0.714285714285714
ITGB2	GNB2L1	PPI	0.571428571428571
HGS	EHMT2	PPI	0.571428571428571
CD86	CD86	PPI	0.571428571428571
SF1	TRIM23	PPI	0.571428571428571
NFIL3	NFIL3	PPI	0.714285714285714
EVL	WASL	PPI	0.571428571428571
CSF2RB	STAT1	PPI	0.571428571428571
VWF	CALR	PPI	0.714285714285714
PALLD	VIL2	PPI	0.571428571428571
FOS	FOS	PPI	0.857142857142857
TPST1	CCR1	PPI	0.714285714285714
TOB2	TOB2	PPI	0.714285714285714
FBXL3	SKP1A	PPI	0.571428571428571
ADRA1A	IL8RB	PPI	0.714285714285714
EZH2	WDR61	PPI	0.714285714285714
KLHL12	KLHL12	PPI	0.714285714285714
TNFRSF11B	VWF	PPI	0.857142857142857
TRRAP	MYC	PPI	0.571428571428571
MCM6	MCM6	PPI	0.714285714285714
PAK2	PAK2	PPI	0.714285714285714
PDLIM5	PRKCB1	PPI	0.714285714285714
SNX4	EGFR	PPI	0.571428571428571
SGK	NEDD4L	PPI	0.571428571428571
HGFAC	HGF	PPI	0.714285714285714
COL4A2	COL4A2	PPI	0.714285714285714
FBXO9	SKP1A	PPI	0.571428571428571
SMARCA4	SMARCC1	PPI	0.857142857142857
FOXP1	FOXP2	PPI	0.714285714285714
TNIK	TNIK	PPI	0.857142857142857
IL6ST	PLAUR	PPI	0.857142857142857
RASSF2	KRAS	PPI	0.571428571428571
S100A10	S100A10	PPI	0.714285714285714
TRIB2	UBQLN4	PPI	0.571428571428571
THBS1	PLG	PPI	0.714285714285714
CXCL10	VCAN	PPI	0.857142857142857
ACAT2	ACAT2	PPI	0.714285714285714
SMAD4	SNRP70	PPI	0.571428571428571
HIPK3	FAS	PPI	0.714285714285714
PPARBP	PPARA	PPI	0.571428571428571
TBL1X	TBL1XR1	PPI	1
SRGN	CD44	PPI	0.571428571428571
C1R	C1R	PPI	0.571428571428571
ITCH	JUN	PPI	0.714285714285714
CKS2	CKS2	PPI	0.857142857142857
BMP1	COL5A1	PPI	0.571428571428571
CTNNB1	CTNNA1	PPI	0.571428571428571
MBP	HLA-DRA	PPI	0.571428571428571
CYBB	CYBA	PPI	0.571428571428571
INSR	CALM3	PPI	0.714285714285714
CSF2RB	HCK	PPI	0.571428571428571
PLA2G4C	PLA2G4C	PPI	0.714285714285714
MAF	MAF	PPI	0.571428571428571
IL28RA	IL28RA	PPI	0.714285714285714
HFE	TFRC	PPI	0.714285714285714
CPN1	CPN1	PPI	0.857142857142857
CDK6	TGFBR1	PPI	0.571428571428571
SPARC	SPARC	PPI	0.571428571428571
GLUD1	GLUD1	PPI	0.571428571428571
ARL6IP2	ARL6IP2	PPI	0.571428571428571
JUN	NCOA2	PPI	0.571428571428571
CLK4	CLK4	PPI	0.714285714285714
AKAP13	PRKAR2A	PPI	0.571428571428571
EDN1	UBQLN4	PPI	0.571428571428571
ARHGDIA	RDX	PPI	0.571428571428571
TGFBR1	CTNNB1	PPI	0.571428571428571
UCP2	YWHAB	PPI	0.714285714285714
NEDD9	ITCH	PPI	0.714285714285714
PDPK1	PDPK1	PPI	0.571428571428571
EPB41L2	NUMA1	PPI	0.714285714285714
INSR	CALM1	PPI	0.571428571428571
MCM3	STAT1	PPI	0.714285714285714
GPX2	GPX2	PPI	0.714285714285714
CASP4	SERPINB9	PPI	0.571428571428571
SH3KBP1	SH3KBP1	PPI	0.714285714285714
ITLN1	ITLN1	PPI	1
MCM7	MCM7	PPI	0.571428571428571
AKAP10	PRKAR2A	PPI	0.571428571428571
APOA4	APOA4	PPI	0.857142857142857
HLA-B	HLA-B	PPI	0.571428571428571
FBLN1	FBLN1	PPI	0.857142857142857
CLDN1	CLDN3	PPI	0.571428571428571
TAF6	TAF6	PPI	0.571428571428571
HGD	HGD	PPI	0.714285714285714
OAT	OAT	PPI	0.714285714285714
ACTN4	SERPINE1	PPI	0.571428571428571
PLAUR	JAK1	PPI	0.571428571428571
UBE2C	UBE2C	PPI	0.857142857142857
TRIM26	TRIM26	PPI	0.714285714285714
LCP2	HCK	PPI	0.571428571428571
IQGAP1	CDH1	PPI	0.571428571428571
CYR61	ITGAV	PPI	0.571428571428571
AGA	AGA	PPI	0.857142857142857
SMURF2	SNRP70	PPI	0.571428571428571
CTNNB1	PSEN1	PPI	0.571428571428571
S100A12	S100A12	PPI	1
DDEF1	SH3KBP1	PPI	0.571428571428571
KLF6	APOM	PPI	0.571428571428571
PRPS1	PRPS1	PPI	0.571428571428571
ATP5C1	PNO1	PPI	0.571428571428571
CCL4	IL8	PPI	0.571428571428571
SHBG	SHBG	PPI	0.857142857142857
DUSP1	HSPA4	PPI	0.714285714285714
CSNK1A1	NFATC3	PPI	0.571428571428571
PRKAR2A	PRKAR2A	PPI	0.571428571428571
TFPI2	PLG	PPI	0.714285714285714
MAF	ETS1	PPI	0.571428571428571
CDA	CDA	PPI	0.571428571428571
UBD	MAD2L1	PPI	0.714285714285714
GSTM3	GSTM3	PPI	0.857142857142857
DIO1	DIO1	PPI	0.571428571428571
MAPKAPK2	ETV1	PPI	0.571428571428571
FBP1	FBP1	PPI	0.714285714285714
SFRS11	TOP1	PPI	0.571428571428571
ESR1	TSC2	PPI	0.571428571428571
EVL	SPTAN1	PPI	0.571428571428571
MDM4	CSNK1A1	PPI	0.571428571428571
UBQLN4	C1QTNF1	PPI	0.571428571428571
SOS1	EPS8L2	PPI	0.571428571428571
SKIL	SPARCL1	PPI	0.571428571428571
MCM3	MCM7	PPI	0.571428571428571
SKP2	SKP1A	PPI	0.571428571428571
KPNA2	TP53	PPI	0.571428571428571
KIFAP3	KIFAP3	PPI	0.571428571428571
SHMT2	SHMT2	PPI	0.571428571428571
ATN1	LYST	PPI	0.571428571428571
ARID1B	SMARCA4	PPI	0.571428571428571
EGFR	PIK3C2A	PPI	0.571428571428571
ARHGDIA	ARHGDIA	PPI	0.571428571428571
HBA1	HBB	PPI	0.857142857142857
CASP4	CASP4	PPI	0.714285714285714
EDNRB	EDN1	PPI	0.571428571428571
CTPS2	CTPS2	PPI	0.571428571428571
ITGB2	ITGB2	PPI	0.857142857142857
AKAP13	ESR1	PPI	0.571428571428571
RAD54B	RAD54B	PPI	0.571428571428571
ECM1	FBLN1	PPI	0.714285714285714
INSR	SOCS2	PPI	0.857142857142857
ARNTL2	EPAS1	PPI	0.571428571428571
ATN1	MBP	PPI	0.571428571428571
SHMT1	PRSS23	PPI	0.714285714285714
CD24	LYN	PPI	0.571428571428571
SDSL	SDSL	PPI	0.714285714285714
RRAS2	SMURF2	PPI	0.571428571428571
NAP1L1	NAP1L1	PPI	0.571428571428571
SMARCA4	CTNNB1	PPI	0.857142857142857
LYST	HGS	PPI	0.571428571428571
LATS2	JUB	PPI	0.571428571428571
NEDD9	SMAD2	PPI	0.571428571428571
TSC2	SMAD3	PPI	0.571428571428571
STAT1	GNB2L1	PPI	0.571428571428571
LPA	FGB	PPI	0.571428571428571
PRKAR2A	VIL2	PPI	0.571428571428571
SMAD4	CTNNB1	PPI	0.857142857142857
FGFR3	HNRPL	PPI	0.571428571428571
CADM1	EPB41L3	PPI	0.571428571428571
AURKA	TP53	PPI	0.571428571428571
IL6ST	IL6R	PPI	0.571428571428571
DACH1	SMAD3	PPI	0.571428571428571
ATF3	SMAD3	PPI	0.571428571428571
ARMCX2	ARMCX2	PPI	0.571428571428571
HSPA8	SP1	PPI	0.571428571428571
KPNA2	KPNA2	PPI	0.857142857142857
TCF7L2	CTNNB1	PPI	0.571428571428571
ETS1	SP1	PPI	0.571428571428571
COL4A1	COL4A2	PPI	0.571428571428571
NDRG1	CTNNB1	PPI	0.571428571428571
TNFRSF11B	FN1	PPI	0.571428571428571
AIF1	LCP1	PPI	0.571428571428571
PTPRE	PTPRE	PPI	0.571428571428571
F5	CALR	PPI	0.714285714285714
MET	SNX2	PPI	0.571428571428571
CALR	CALR	PPI	0.714285714285714
RAB34	SMAD2	PPI	0.571428571428571
IFIT3	IFIT3	PPI	0.571428571428571
CDC2	STMN1	PPI	0.714285714285714
TP53	EPHA3	PPI	0.571428571428571
TPX2	AURKA	PPI	0.571428571428571
CDKN3	CDC2	PPI	0.714285714285714
SFN	TSC2	PPI	0.571428571428571
ABCA1	LMO7	PPI	0.571428571428571
RAC2	NCF2	PPI	0.571428571428571
CLU	LEPR	PPI	0.714285714285714
FGFR1	FGFR1	PPI	0.571428571428571
SLC9A3R2	SLC22A9	PPI	0.571428571428571
JUN	ETS2	PPI	0.714285714285714
CCL5	PIGR	PPI	0.571428571428571
SNX4	LEPR	PPI	0.571428571428571
MAD2L1	INSR	PPI	0.714285714285714
DCN	COL1A1	PPI	0.714285714285714
CREM	CREM	PPI	0.571428571428571
IL8RB	CXCL6	PPI	0.857142857142857
PDCD6	FAS	PPI	0.571428571428571
PTK2	ITGB2	PPI	0.571428571428571
CBX3	CBX3	PPI	0.714285714285714
CKS1B	CKS1B	PPI	0.571428571428571
SMURF2	SMAD2	PPI	0.714285714285714
CD47	ITGAV	PPI	0.571428571428571
E2F3	SP1	PPI	0.571428571428571
CTBP2	CTBP2	PPI	0.571428571428571
TGFBR1	WDR61	PPI	0.571428571428571
CASP1	ATN1	PPI	0.714285714285714
SMYD2	TP53	PPI	0.714285714285714
IFI16	ID1	PPI	0.857142857142857
FCGR2B	C14orf1	PPI	0.571428571428571
PRKAR2A	SMAD4	PPI	0.571428571428571
CD4	PTPRC	PPI	0.571428571428571
HCK	HCK	PPI	0.571428571428571
PRC1	RACGAP1	PPI	0.857142857142857
TRIM23	GEM	PPI	0.571428571428571
FUS	FUS	PPI	0.571428571428571
RASSF5	RASSF5	PPI	0.714285714285714
GPLD1	GM2A	PPI	0.714285714285714
DDX24	DDX24	PPI	0.571428571428571
PRNP	APLP2	PPI	0.571428571428571
CALM1	CALM1	PPI	0.571428571428571
FAM48A	UBQLN4	PPI	0.571428571428571
STON2	STON2	PPI	0.714285714285714
SMAD3	JUN	PPI	0.571428571428571
SOS1	EGFR	PPI	0.714285714285714
RPS27	RPS27	PPI	0.571428571428571
C6	C5	PPI	0.571428571428571
SEPT4	SEPT4	PPI	0.571428571428571
JUB	SLC1A2	PPI	0.571428571428571
ID1	PSMD4	PPI	0.714285714285714
HMMR	TPX2	PPI	0.571428571428571
CASP1	BCL2L1	PPI	0.571428571428571
TRIB1	MAP2K1	PPI	0.857142857142857
GNAO1	GNAO1	PPI	0.857142857142857
MDH1	MDH1	PPI	0.714285714285714
CBLB	EGFR	PPI	0.571428571428571
SMAD4	SKIL	PPI	0.571428571428571
LYN	EPOR	PPI	0.571428571428571
SGK	NEDD4	PPI	0.571428571428571
VWF	COL1A1	PPI	0.857142857142857
CD74	HLA-DPA1	PPI	0.714285714285714
CD69	CD69	PPI	0.571428571428571
SPEN	RBBP4	PPI	0.571428571428571
DVL3	DVL3	PPI	0.571428571428571
RGS2	HSPA8	PPI	0.571428571428571
KCNN2	KCNN2	PPI	1
ESR1	DUT	PPI	0.714285714285714
ATN1	FBLN1	PPI	0.571428571428571
PPP2R1B	PPP2R5C	PPI	0.571428571428571
ABCA1	ARHGEF11	PPI	0.571428571428571
NCOA2	NCOA2	PPI	0.714285714285714
PLD1	ARF1	PPI	0.571428571428571
KIAA1632	ATF7IP	PPI	0.571428571428571
MARCKS	CTSB	PPI	0.571428571428571
FEZ1	WWC1	PPI	0.714285714285714
MT2A	SHBG	PPI	0.714285714285714
POGZ	SP1	PPI	0.571428571428571
PRPF40A	SF1	PPI	0.571428571428571
CD8A	CD8A	PPI	0.571428571428571
PACSIN2	PACSIN2	PPI	0.571428571428571
SPEN	SOX9	PPI	0.714285714285714
MYLIP	MTAP	PPI	0.571428571428571
BICD2	DCTN1	PPI	0.571428571428571
GPR125	DLG1	PPI	0.571428571428571
SMAD2	SQSTM1	PPI	0.571428571428571
SPTAN1	CTNNA1	PPI	0.571428571428571
TRIM23	TRIM23	PPI	0.714285714285714
CASP4	IL1B	PPI	0.714285714285714
LGALS3BP	CD14	PPI	0.714285714285714
ATN1	CBFA2T2	PPI	0.714285714285714
C8A	C9	PPI	0.714285714285714
KLF4	SP1	PPI	0.571428571428571
SPARC	COL1A2	PPI	0.571428571428571
FNTB	GBP1	PPI	0.571428571428571
CDC2	BIRC5	PPI	0.571428571428571
TP53	RRM2	PPI	0.571428571428571
PRKCB1	PRKCB1	PPI	0.714285714285714
KLF6	TP53	PPI	0.714285714285714
MAPK8IP3	MAP3K11	PPI	0.571428571428571
FN1	DCN	PPI	0.571428571428571
HSPA4	KPNA2	PPI	0.571428571428571
CTNNB1	CDK6	PPI	0.857142857142857
IGHM	UBQLN4	PPI	0.857142857142857
THY1	THY1	PPI	0.714285714285714
CTNNB1	MET	PPI	0.571428571428571
CASP1	NEDD4	PPI	0.571428571428571
SNX27	DGKZ	PPI	0.571428571428571
HSPA8	BAG1	PPI	0.571428571428571
CPN1	C5	PPI	0.571428571428571
B4GALT1	B4GALT1	PPI	0.857142857142857
PAK2	SH3KBP1	PPI	0.571428571428571
DPP4	CXCL11	PPI	0.571428571428571
CSNK1A1	CTNNB1	PPI	0.714285714285714
FCN3	FCN3	PPI	1
CXCL12	CXCR4	PPI	0.571428571428571
TFPI2	F11	PPI	0.857142857142857
LAMA3	BMP1	PPI	0.571428571428571
FOXA2	TLE1	PPI	0.571428571428571
CTSL1	CTSL1	PPI	0.714285714285714
LEF1	CTNNB1	PPI	0.571428571428571
GNAI1	EPOR	PPI	0.571428571428571
ARHGEF11	ARHGEF11	PPI	0.571428571428571
ARHGEF7	CBLB	PPI	0.571428571428571
RACGAP1	RACGAP1	PPI	1
COL1A2	CD44	PPI	0.714285714285714
ITGB2	CD14	PPI	0.714285714285714
TMPRSS6	COL1A1	PPI	0.571428571428571
SNX2	INSR	PPI	0.571428571428571
LMNA	LMNA	PPI	0.714285714285714
THBS2	THBS2	PPI	0.714285714285714
TK1	TLE1	PPI	0.714285714285714
IL6ST	LIFR	PPI	0.857142857142857
ATF7IP	SP1	PPI	0.571428571428571
FAS	FAS	PPI	0.714285714285714
PRKCB1	TOP2A	PPI	0.714285714285714
SLC16A10	RACGAP1	PPI	0.571428571428571
DCN	C1QA	PPI	0.714285714285714
SOCS3	EPOR	PPI	0.714285714285714
FCN1	FCN1	PPI	0.571428571428571
SNX2	LEPR	PPI	0.571428571428571
SMAD4	JUNB	PPI	0.714285714285714
SOS1	RANBP9	PPI	0.571428571428571
PAG1	LCP2	PPI	0.571428571428571
TP53	SP1	PPI	0.571428571428571
YWHAB	RALGPS2	PPI	0.571428571428571
DCTN1	KIF11	PPI	0.571428571428571
FCN2	MASP1	PPI	1
JUN	TOP2A	PPI	0.714285714285714
TYMS	TYMS	PPI	0.714285714285714
CTSB	CTSB	PPI	0.714285714285714
AKAP1	PRKAR2A	PPI	0.571428571428571
PBK	SMAD4	PPI	0.571428571428571
NDC80	NUF2	PPI	0.857142857142857
SMAD2	ESR1	PPI	0.571428571428571
CR1	C1QA	PPI	0.571428571428571
IGF2	PLG	PPI	0.571428571428571
CLEC4G	CLEC4G	PPI	1
MERTK	MERTK	PPI	0.714285714285714
FN1	HGF	PPI	0.571428571428571
ATXN1	ANKHD1	PPI	0.571428571428571
PVRL2	PVRL2	PPI	0.714285714285714
ENAH	FAT	PPI	0.571428571428571
TP53	SERPINB9	PPI	0.571428571428571
C1QB	C1QA	PPI	0.714285714285714
AURKA	NDC80	PPI	0.857142857142857
CFTR	CFTR	PPI	0.571428571428571
DCN	COL5A1	PPI	0.571428571428571
KLF12	EHMT2	PPI	0.714285714285714
MCM4	MCM4	PPI	0.571428571428571
NCOR1	TBL1X	PPI	0.714285714285714
NPHP3	NPHP3	PPI	0.857142857142857
RRM1	RRM1	PPI	0.571428571428571
TP53	EGR1	PPI	0.714285714285714
PIAS1	STAT1	PPI	0.571428571428571
RAB4A	TP53	PPI	0.571428571428571
COL1A2	SHBG	PPI	0.857142857142857
SQSTM1	GABARAPL1	PPI	0.714285714285714
ARHGDIB	RAC2	PPI	0.571428571428571
FEZ1	FEZ1	PPI	0.857142857142857
HGF	LCN2	PPI	0.714285714285714
LCP2	LYN	PPI	0.571428571428571
SKIL	TFPI2	PPI	0.571428571428571
GSTM3	GSTM2	PPI	0.714285714285714
CCR1	CCL2	PPI	0.714285714285714
DEDD	CFLAR	PPI	0.571428571428571
MINK1	CALM3	PPI	0.571428571428571
PKP2	DSG2	PPI	0.714285714285714
DSP	DSP	PPI	0.571428571428571
KPNB1	CSNK1A1	PPI	0.571428571428571
PPFIBP1	PPFIBP1	PPI	1
COL5A3	COL1A2	PPI	0.571428571428571
PIAS1	SMAD4	PPI	0.571428571428571
IL8RB	IL8RB	PPI	0.857142857142857
SKP1A	FBXO3	PPI	0.571428571428571
GSTM2	GSTM2	PPI	0.714285714285714
EGFR	FAS	PPI	0.571428571428571
BUB3	BUB1B	PPI	0.714285714285714
TSC22D1	TSC22D1	PPI	0.571428571428571
SMAD3	DAB2	PPI	0.571428571428571
CD8A	PTPRC	PPI	0.571428571428571
CBLB	NEDD4	PPI	0.571428571428571
ATP5C1	EGFR	PPI	0.571428571428571
ATXN3	CASP1	PPI	0.857142857142857
CD44	CD44	PPI	0.714285714285714
PTK2	ATG12	PPI	0.571428571428571
TRIM11	TRIM11	PPI	0.714285714285714
DPP4	CXCL9	PPI	0.571428571428571
CX3CL1	CX3CL1	PPI	0.571428571428571
UHMK1	STMN1	PPI	0.714285714285714
C1QBP	C1QBP	PPI	0.714285714285714
TEK	TEK	PPI	0.571428571428571
MELK	MBP	PPI	0.714285714285714
PTGS2	PTGS2	PPI	1
CRYZ	CRYAA	PPI	0.571428571428571
CDC14B	TP53	PPI	0.571428571428571
SMURF2	TFPI2	PPI	1
SMAD3	JUNB	PPI	0.714285714285714
CD4	HLA-DQB1	PPI	0.571428571428571
ANGPT1	ANGPT1	PPI	0.571428571428571
INSR	SOCS6	PPI	0.571428571428571
SSBP1	SSBP1	PPI	0.571428571428571
CBLB	SH3KBP1	PPI	0.714285714285714
CALR	APOB	PPI	0.571428571428571
MAP2K4	MAP2K4	PPI	0.571428571428571
CCR1	CCL5	PPI	0.857142857142857
KPNA2	PTMA	PPI	0.571428571428571
MAFB	MAFB	PPI	0.714285714285714
DDX3Y	SHBG	PPI	0.857142857142857
CDKN2A	CDKN2A	PPI	0.857142857142857
GNB2L1	JAK1	PPI	0.571428571428571
MCM5	STAT1	PPI	0.714285714285714
CDH1	VIL2	PPI	0.571428571428571
CDKN3	CDKN3	PPI	0.857142857142857
ZMYND11	ETS2	PPI	0.571428571428571
PAK2	SORBS2	PPI	0.571428571428571
C7	CLU	PPI	0.571428571428571
NCOR1	NCOR1	PPI	0.714285714285714
CIDEB	CIDEB	PPI	0.714285714285714
SLC8A1	YWHAB	PPI	0.571428571428571
CDKN2A	AHNAK	PPI	0.571428571428571
LCP2	PTPRC	PPI	0.857142857142857
STAT1	CXCR4	PPI	0.571428571428571
PTPRC	JAK1	PPI	0.571428571428571
MDM4	YWHAE	PPI	0.571428571428571
CTSB	RGS2	PPI	0.714285714285714
CXCL12	CD4	PPI	0.714285714285714
ST6GAL2	ST6GAL2	PPI	0.571428571428571
IGFBP3	COL1A1	PPI	0.857142857142857
GNAO1	GNAI1	PPI	0.571428571428571
RGS4	ERBB3	PPI	0.714285714285714
COPS8	COPS8	PPI	0.571428571428571
CD4	CD53	PPI	0.571428571428571
NPR2	NPR2	PPI	0.714285714285714
CRYAA	CRYAA	PPI	0.857142857142857
ATP2A2	ATP2A2	PPI	0.571428571428571
NR5A2	ALB	PPI	0.714285714285714
SYT9	SYT9	PPI	0.571428571428571
FNTB	HRAS	PPI	0.571428571428571
NR1I3	PPARBP	PPI	0.571428571428571
EGR1	SP1	PPI	0.714285714285714
IL15	IL2RB	PPI	0.571428571428571
KLF4	TP53	PPI	0.571428571428571
JUNB	JUNB	PPI	0.857142857142857
C10orf18	C10orf18	PPI	0.571428571428571
S100P	VIL2	PPI	0.571428571428571
CHD4	ATR	PPI	0.571428571428571
CTSL1	CTSC	PPI	0.571428571428571
GGA1	GGA1	PPI	0.714285714285714
ANGPTL1	ANGPTL1	PPI	0.571428571428571
UBQLN4	ATXN1	PPI	0.714285714285714
GEM	YWHAB	PPI	0.571428571428571
PAIP1	EIF4A1	PPI	0.571428571428571
INSR	INSR	PPI	0.857142857142857
ASCL1	ASCL1	PPI	0.857142857142857
UBR2	UBE2B	PPI	0.571428571428571
HSP90AB1	WASL	PPI	0.571428571428571
CNDP1	CNDP1	PPI	0.857142857142857
ADAMTS1	VCAN	PPI	0.714285714285714
TNRC6B	UBQLN4	PPI	0.714285714285714
CCDC91	CCDC91	PPI	0.571428571428571
CORO1A	THBS1	PPI	0.571428571428571
H2AFX	H2AFX	PPI	0.857142857142857
HIST1H2BG	TGM2	PPI	0.571428571428571
CCAR1	SFN	PPI	0.571428571428571
PTPRC	INSR	PPI	0.857142857142857
EGFR	EGFR	PPI	0.714285714285714
SMAD3	ZBTB16	PPI	0.571428571428571
ATXN1	ZC3H7B	PPI	0.571428571428571
NEK2	NEK2	PPI	0.857142857142857
CALR	TAPBP	PPI	0.571428571428571
RAB27A	C14orf1	PPI	0.571428571428571
BAG1	ESR1	PPI	0.571428571428571
DLG1	DLG1	PPI	0.571428571428571
ESR1	MLL2	PPI	0.571428571428571
NDC80	ZWINT	PPI	0.857142857142857
ARF1	ARF1	PPI	0.571428571428571
SMC2	SMC4	PPI	0.714285714285714
JUN	FOS	PPI	0.714285714285714
CDA	KPNA2	PPI	0.571428571428571
FPR1	SAA1	PPI	0.571428571428571
PRKCB1	DAB2	PPI	0.571428571428571
TNFRSF10D	TNFRSF10D	PPI	0.571428571428571
PRPF40A	SMAD4	PPI	0.571428571428571
GRB10	INSR	PPI	0.857142857142857
CHD9	ESR1	PPI	0.571428571428571
PRKD3	KPNA2	PPI	0.714285714285714
TCF4	TCF4	PPI	0.571428571428571
RBM7	SFRS3	PPI	0.571428571428571
RGS2	CALM1	PPI	0.571428571428571
EGFR	DCN	PPI	0.571428571428571
TLE1	ATN1	PPI	0.571428571428571
NR1H4	ESR1	PPI	0.571428571428571
ZNF451	PRPF40A	PPI	0.714285714285714
HIPK3	C1QA	PPI	0.571428571428571
CFLAR	BCL2L1	PPI	0.571428571428571
BAG1	BCL2L1	PPI	0.571428571428571
MNDA	CDC2	PPI	0.571428571428571
CDC42EP3	CDC42EP3	PPI	0.571428571428571
LUM	COL1A2	PPI	0.714285714285714
THBS1	COL3A1	PPI	1
SMAD2	DAB2	PPI	0.714285714285714
CASK	CASK	PPI	0.571428571428571
SFRS4	SMURF2	PPI	0.571428571428571
DPP4	DPP4	PPI	0.857142857142857
VCAN	VCAN	PPI	1
SNX2	SNX2	PPI	0.571428571428571
ATXN1	NCOR1	PPI	0.571428571428571
PCBD1	PCBD1	PPI	0.571428571428571
ARSF	SNRP70	PPI	0.571428571428571
C7	C5	PPI	0.571428571428571
NCOA3	NCOA3	PPI	0.571428571428571
NAB1	EGR1	PPI	0.571428571428571
PEA15	PLD1	PPI	0.571428571428571
GSTZ1	GSTZ1	PPI	0.857142857142857
PRPF40A	WASL	PPI	0.571428571428571
EIF5	EIF1AY	PPI	0.857142857142857
DFFB	TOP2A	PPI	0.571428571428571
ATR	RHEB	PPI	0.571428571428571
KLF6	EHMT2	PPI	0.571428571428571
CD74	HLA-DQA1	PPI	0.714285714285714
PTGS1	PTGS1	PPI	0.714285714285714
GSTM1	GSTM1	PPI	0.714285714285714
FCGR2B	CRP	PPI	0.857142857142857
ATOX1	ATOX1	PPI	0.714285714285714
HRAS	LGALS1	PPI	0.571428571428571
GPLD1	APOA4	PPI	0.857142857142857
TLR4	CD14	PPI	0.857142857142857
SOCS3	LEPR	PPI	0.714285714285714
ATXN1	KLF11	PPI	0.571428571428571
PYGL	PYGL	PPI	0.571428571428571
IL1RAP	PRPF40A	PPI	0.714285714285714
ENTPD5	ENTPD5	PPI	0.571428571428571
CHN2	TGFBR1	PPI	0.571428571428571
TK1	SETDB1	PPI	0.714285714285714
SOCS6	TGFBR1	PPI	0.571428571428571
CD4	CD44	PPI	0.571428571428571
C2	MASP1	PPI	0.714285714285714
CADM1	ATF7IP	PPI	0.714285714285714
EPHB2	EPHB2	PPI	0.571428571428571
KLF6	PNO1	PPI	0.714285714285714
GDA	DLG1	PPI	0.571428571428571
AR	CTNNB1	PPI	0.571428571428571
RGS4	CALM1	PPI	0.571428571428571
CYP2C19	POR	PPI	0.857142857142857
CBFA2T2	NCOR1	PPI	0.571428571428571
STK4	TP53	PPI	0.571428571428571
ZBTB16	TXNIP	PPI	0.571428571428571
GCH1	GCH1	PPI	0.714285714285714
RGS2	PRKCB1	PPI	0.714285714285714
IL6ST	ERBB3	PPI	0.714285714285714
S100A8	S100A8	PPI	1
PHLDA1	PLSCR1	PPI	0.571428571428571
TGM2	FN1	PPI	0.571428571428571
ATF3	TP53	PPI	0.714285714285714
PIK3CD	PIK3CD	PPI	0.571428571428571
IFNAR1	PTPRC	PPI	0.714285714285714
PLA2G2A	DCN	PPI	0.571428571428571
YWHAB	OSBPL3	PPI	0.571428571428571
TLE1	CDC2	PPI	0.571428571428571
ABCD3	ABCD3	PPI	0.714285714285714
DCTN1	DCTN1	PPI	0.714285714285714
CTSL1	IL8	PPI	0.714285714285714
CRLS1	MCM6	PPI	0.571428571428571
PPFIBP1	PTPRM	PPI	0.714285714285714
FHL2	ITGB2	PPI	0.714285714285714
FGF13	FGF13	PPI	0.857142857142857
APOA1	APOA1	PPI	0.571428571428571
UBE2A	TP53	PPI	0.571428571428571
TBL1X	CTNNB1	PPI	0.857142857142857
PPP2R1B	HSPD1	PPI	0.571428571428571
FEZ1	NBR1	PPI	0.714285714285714
CD47	THBS1	PPI	0.857142857142857
ETS2	ETS1	PPI	0.571428571428571
FAS	MET	PPI	0.571428571428571
CXCL10	CXCL10	PPI	0.857142857142857
DBH	DBH	PPI	0.857142857142857
PRMT2	PRMT2	PPI	0.714285714285714
ALDH3A1	ALDH3A1	PPI	0.571428571428571
SERPINE1	SERPINE1	PPI	1
TMPRSS2	TMPRSS2	PPI	0.571428571428571
LCN2	LCN2	PPI	0.714285714285714
KCNK1	KCNK1	PPI	0.571428571428571
LIMS1	EHMT2	PPI	0.571428571428571
COTL1	ALOX5	PPI	0.714285714285714
SOCS3	SOCS2	PPI	0.714285714285714
DCN	COL14A1	PPI	0.714285714285714
MDK	UBQLN4	PPI	0.571428571428571
CTNNA1	CDH1	PPI	0.714285714285714
VNN2	ITGB2	PPI	0.714285714285714
PPP1R15A	PPP1R1A	PPI	0.571428571428571
SNRPN	TP53	PPI	0.571428571428571
MAP2	MAP2	PPI	0.857142857142857
DPP4	CCL5	PPI	0.857142857142857
GRB10	GHR	PPI	0.714285714285714
ADSSL1	ADSSL1	PPI	0.571428571428571
PTPRM	CTNNB1	PPI	0.571428571428571
GGA1	ARF1	PPI	0.571428571428571
CTSS	SLPI	PPI	0.714285714285714
LBP	CD14	PPI	0.714285714285714
CSF2RB	EPOR	PPI	0.714285714285714
EGFR	VIL2	PPI	0.571428571428571
ATF7IP2	SP1	PPI	0.571428571428571
PRPF40A	UBQLN4	PPI	0.571428571428571
PRPF4B	SFRS1	PPI	0.571428571428571
DCN	COL1A2	PPI	0.857142857142857
EIF5A	TGM2	PPI	0.714285714285714
MSN	VIL2	PPI	0.571428571428571
TAPBP	HLA-C	PPI	0.714285714285714
ASS1	ASS1	PPI	0.857142857142857
PRNP	PLG	PPI	0.571428571428571
NR1I3	PPARGC1A	PPI	0.714285714285714
ARHGDIB	VIL2	PPI	0.571428571428571
TGFB1I1	UBQLN4	PPI	0.714285714285714
CDC37L1	CDC37L1	PPI	0.571428571428571
HBB	HBB	PPI	0.857142857142857
C1QC	C1QB	PPI	0.571428571428571
COL1A1	CD44	PPI	0.571428571428571
LAMB1	COL6A1	PPI	0.571428571428571
CADM1	CADM1	PPI	1
RBBP4	SP3	PPI	0.571428571428571
RAB11FIP2	RAB11FIP2	PPI	0.571428571428571
MCM3	MCM6	PPI	0.571428571428571
PRUNE	PRUNE	PPI	0.714285714285714
MAPK8IP3	MAPK8IP3	PPI	0.571428571428571
SLC9A3R2	RDX	PPI	0.571428571428571
EGFR	HGS	PPI	0.571428571428571
CPM	HBA2	PPI	0.571428571428571
ESR1	CTNNB1	PPI	0.571428571428571
CDKN2C	CDK6	PPI	0.857142857142857
CDH1	EGFR	PPI	0.571428571428571
KCNB1	KCNB1	PPI	0.571428571428571
PDGFRA	PDGFRA	PPI	0.714285714285714
HEXA	GM2A	PPI	0.714285714285714
APLP2	APLP2	PPI	0.571428571428571
FN1	COL4A2	PPI	0.571428571428571
EGFR	CTNNB1	PPI	0.714285714285714
SMARCA4	IKZF1	PPI	0.571428571428571
SKAP2	SKAP2	PPI	0.571428571428571
SMAD3	CYP11A1	PPI	0.571428571428571
GADD45B	CCNB1	PPI	0.714285714285714
CDC2	CDC2	PPI	0.714285714285714
SYTL4	SYTL4	PPI	0.714285714285714
PTPRC	VIL2	PPI	0.571428571428571
RPL5	RPL5	PPI	0.571428571428571
SMARCA4	ESR1	PPI	0.714285714285714
ITCH	ITCH	PPI	0.857142857142857
ARL4C	UBQLN4	PPI	0.571428571428571
PDIA5	UBQLN4	PPI	0.714285714285714
SKP1A	SKP1A	PPI	0.571428571428571
PDIA3	TAP1	PPI	0.571428571428571
GLUD2	GLUD2	PPI	1
YWHAE	TSC2	PPI	0.571428571428571
PRNP	HSPD1	PPI	0.714285714285714
ANK3	FAS	PPI	0.571428571428571
HSD17B14	HSD17B14	PPI	0.857142857142857
PEG3	USP7	PPI	0.571428571428571
RAB27A	ZBTB16	PPI	0.714285714285714
HLA-C	CALR	PPI	0.714285714285714
STMN1	UBQLN4	PPI	0.714285714285714
PLG	PLG	PPI	0.714285714285714
EPB41L2	SPTAN1	PPI	0.571428571428571
VCAN	CD44	PPI	0.714285714285714
CDH1	PTPRM	PPI	0.571428571428571
GLUL	GLUL	PPI	0.714285714285714
HLA-B	ATF7IP	PPI	0.571428571428571
MAPK8IP3	MAP2K4	PPI	0.571428571428571
GPC3	IGF2	PPI	0.571428571428571
SPTAN1	SPTBN1	PPI	0.714285714285714
AZGP1	AZGP1	PPI	0.571428571428571
SPP1	UBQLN4	PPI	0.571428571428571
BCHE	BCHE	PPI	0.571428571428571
EVL	LYN	PPI	0.571428571428571
CETP	CETP	PPI	1
CD36	COL1A1	PPI	0.571428571428571
ESR1	JUNB	PPI	0.571428571428571
IL8RB	CXCL2	PPI	0.714285714285714
ITGB2	RDX	PPI	0.571428571428571
AP1S1	AP1S1	PPI	0.571428571428571
TCF3	CTNNB1	PPI	0.571428571428571
BCL2L10	BCL2L1	PPI	0.571428571428571
SOS1	HCK	PPI	0.571428571428571
ARF1	ARHGAP21	PPI	0.571428571428571
LYST	YWHAB	PPI	0.571428571428571
ACLY	ACLY	PPI	0.571428571428571
SULT2A1	SULT2A1	PPI	0.714285714285714
MLLT10	MLLT10	PPI	0.857142857142857
GNB2L1	GNB2L1	PPI	0.571428571428571
VIL2	CD44	PPI	0.571428571428571
KLRK1	KLRK1	PPI	0.571428571428571
ETS2	SMARCA4	PPI	1
SYNC1	DTNA	PPI	0.714285714285714
FDX1	FDX1	PPI	0.714285714285714
SMAD2	TGM2	PPI	0.714285714285714
DNMT3A	EZH2	PPI	0.571428571428571
FEZ1	OLFML3	PPI	0.714285714285714
TGM2	ANXA1	PPI	0.571428571428571
DLAT	PDK1	PPI	0.571428571428571
TFRC	TFRC	PPI	0.857142857142857
TIAM1	TIAM1	PPI	0.571428571428571
E2F3	CDK3	PPI	0.571428571428571
CFLAR	MAP2K4	PPI	0.571428571428571
UBQLN4	UBQLN4	PPI	0.857142857142857
SMAD4	SMAD4	PPI	0.857142857142857
KPNA4	TGM2	PPI	0.714285714285714
RAC2	SMAD4	PPI	0.571428571428571
PTK2	SOCS2	PPI	0.571428571428571
NEK2	NDC80	PPI	0.857142857142857
SERPINE1	PLG	PPI	0.714285714285714
CCL2	CCL2	PPI	0.857142857142857
TLR3	TLR3	PPI	0.571428571428571
BAG1	HSPA1B	PPI	0.571428571428571
JUN	JUN	PPI	0.714285714285714
RFWD2	RFWD2	PPI	0.571428571428571
CTSC	CTSC	PPI	0.857142857142857
TAF15	SF1	PPI	0.571428571428571
SERPINE1	UBQLN4	PPI	0.857142857142857
YWHAB	YWHAB	PPI	0.714285714285714
ATF7IP	RRBP1	PPI	0.571428571428571
HNRPL	HNRPL	PPI	0.571428571428571
FAS	C14orf1	PPI	0.571428571428571
PRKAR1A	EGFR	PPI	0.714285714285714
RECQL	RECQL	PPI	0.714285714285714
INSR	JAK1	PPI	0.571428571428571
MBD3	MBD3	PPI	0.571428571428571
YWHAB	SFRS3	PPI	0.571428571428571
MTA1	RBBP4	PPI	0.571428571428571
FDFT1	TMEM43	PPI	0.571428571428571
HRAS	INSR	PPI	0.571428571428571
TRRAP	ESR1	PPI	0.571428571428571
FECH	FECH	PPI	0.571428571428571
CDC2	TK1	PPI	0.714285714285714
TCF12	PRSS23	PPI	0.571428571428571
JUN	EGR1	PPI	0.714285714285714
KCNJ8	KCNJ8	PPI	0.571428571428571
HBB	HBA2	PPI	0.857142857142857
THBS1	CD36	PPI	0.714285714285714
NCOA2	ESR1	PPI	0.571428571428571
TKT	TKT	PPI	0.571428571428571
SYTL4	RAB27A	PPI	0.714285714285714
FN1	SMAD4	PPI	0.571428571428571
CDH1	CDH1	PPI	0.857142857142857
SKIL	SRP72	PPI	0.571428571428571
TLE1	CDKN2C	PPI	0.714285714285714
GNMT	GNMT	PPI	0.857142857142857
ATF3	NUF2	PPI	0.714285714285714
TGFA	TGFA	PPI	0.571428571428571
ADAR	ADAR	PPI	0.571428571428571
NFIB	NFIX	PPI	0.571428571428571
PPP2R1B	MCM3	PPI	0.714285714285714
DNMT3L	DNMT3A	PPI	0.571428571428571
AURKA	AURKA	PPI	0.857142857142857
SMAD2	STAMBPL1	PPI	0.571428571428571
IGF1	IGFBP5	PPI	0.571428571428571
PDCD6	PDCD6	PPI	0.571428571428571
PSPH	PSPH	PPI	0.714285714285714
TLR4	MAPK8IP3	PPI	0.571428571428571
INHBE	INHBE	PPI	0.571428571428571
HBG2	HBB	PPI	0.857142857142857
NFIX	NFIX	PPI	0.714285714285714
CYBA	NCF2	PPI	0.714285714285714
RGS5	GNAO1	PPI	0.714285714285714
DLG5	CTNNB1	PPI	0.571428571428571
HAVCR2	HAVCR2	PPI	0.714285714285714
MDK	MDK	PPI	0.714285714285714
OAT	UBQLN4	PPI	0.571428571428571
ZMYND8	PRKCB1	PPI	0.714285714285714
DPP4	PTPRC	PPI	0.714285714285714
MT1G	SHBG	PPI	0.714285714285714
BGN	COL1A1	PPI	0.571428571428571
CHD9	NR1I3	PPI	0.714285714285714
HGS	MET	PPI	0.571428571428571
RABGGTB	RAB27A	PPI	0.571428571428571
KCNN2	CALM1	PPI	0.571428571428571
PDGFRA	STAT1	PPI	0.571428571428571
MUT	MUT	PPI	0.857142857142857
NCOA2	DDX17	PPI	0.714285714285714
PHLDA1	HSPA4	PPI	0.714285714285714
BCL2L10	BCL2L10	PPI	0.714285714285714
GLS2	CASK	PPI	0.571428571428571
SPARC	COL3A1	PPI	0.571428571428571
MCAM	ATF7IP	PPI	0.571428571428571
LCP1	LCP1	PPI	0.571428571428571
GCHFR	GCHFR	PPI	0.571428571428571
TSC2	SMAD2	PPI	0.571428571428571
NCOR1	ESR1	PPI	0.571428571428571
STAT1	STAT1	PPI	0.857142857142857
INSR	IGF2	PPI	0.714285714285714
PRKD2	PRKD2	PPI	0.571428571428571
F8	VWF	PPI	0.571428571428571
PTS	PTS	PPI	0.714285714285714
SMURF2	SKIL	PPI	0.571428571428571
KPNB1	IGFBP3	PPI	0.571428571428571
IFT57	IFT57	PPI	0.571428571428571
REPS1	REPS2	PPI	0.571428571428571
CDK2	PRKAR1A	PPI	0.571428571428571
VIL2	VIL2	PPI	0.714285714285714
EPOR	EPOR	PPI	1
TRAF5	TRAF5	PPI	0.714285714285714
HRAS	AGTR1	PPI	0.571428571428571
NEDD9	TCF3	PPI	0.571428571428571
CD1D	PTPRC	PPI	0.571428571428571
ABAT	ABAT	PPI	0.571428571428571
LOX	DPT	PPI	0.571428571428571
ESR1	EGFR	PPI	0.571428571428571
SKAP1	FYB	PPI	0.714285714285714
IGFALS	IGFBP3	PPI	0.714285714285714
EGR2	MED31	PPI	0.714285714285714
CASP1	CASP1	PPI	0.857142857142857
CDKN2A	UBE2A	PPI	0.571428571428571
KPNA2	CSNK1A1	PPI	0.571428571428571
GNAI1	GNAI1	PPI	0.571428571428571
SMURF2	SOCS6	PPI	0.571428571428571
ERBB3	ERBB3	PPI	0.857142857142857
FN1	APCS	PPI	0.571428571428571
MCM5	CDKN2A	PPI	0.714285714285714
PTEN	TP53	PPI	0.571428571428571
TGFBR1	CLU	PPI	0.571428571428571
PTPRC	LGALS1	PPI	0.571428571428571
CSE1L	CDH1	PPI	0.571428571428571
IGF2	IGFBP3	PPI	0.857142857142857
CD74	HLA-DRA	PPI	0.571428571428571
ETS1	ETS1	PPI	0.571428571428571
PRKCB1	MARCKS	PPI	0.571428571428571
REV1	POLI	PPI	0.571428571428571
LYN	IL7R	PPI	0.571428571428571
CCNA2	CDC2	PPI	0.714285714285714
CBLB	FYB	PPI	0.714285714285714
HERC5	CCNB1	PPI	0.571428571428571
ST6GAL1	ST6GAL1	PPI	1
ARID1B	ARID1B	PPI	0.571428571428571
ALDOB	ALDOB	PPI	0.714285714285714
CDC2	CKS2	PPI	0.714285714285714
PPOX	PPOX	PPI	0.571428571428571
EGR1	CDKN2A	PPI	0.857142857142857
CRIPT	UBQLN4	PPI	0.714285714285714
PSEN1	PSEN1	PPI	0.571428571428571
YAP1	HNRPU	PPI	0.571428571428571
DDX17	SNRP70	PPI	0.571428571428571
CRYAA	ALB	PPI	0.857142857142857
FKBP1A	FKBP1A	PPI	0.571428571428571
SNX1	LEPR	PPI	0.571428571428571
PRPF4B	KLF13	PPI	0.571428571428571
PTTG1	TP53	PPI	0.571428571428571
S100A8	C14orf1	PPI	0.571428571428571
CYP17A1	POR	PPI	0.571428571428571
G3BP1	G3BP1	PPI	0.714285714285714
HMOX1	POR	PPI	0.571428571428571
CTNNA1	PSEN1	PPI	0.571428571428571
ATF2	ATF2	PPI	0.571428571428571
PLA2G2A	PLA2G2A	PPI	0.714285714285714
GSTM2	GSTM1	PPI	0.714285714285714
CAT	CAT	PPI	0.857142857142857
FMNL2	PRPF40A	PPI	0.714285714285714
THBS1	TFPI	PPI	0.714285714285714
PDGFA	PDGFA	PPI	0.571428571428571
SFN	CDC2	PPI	0.571428571428571
RHEB	TSC2	PPI	0.857142857142857
DUT	DUT	PPI	1
ATXN1	KLHL12	PPI	0.571428571428571
CDC2	TOP2A	PPI	0.714285714285714
HGS	UBQLN4	PPI	0.571428571428571
SMAD4	JUN	PPI	0.571428571428571
SOS1	FGFR1	PPI	0.571428571428571
DUT	PPARA	PPI	0.571428571428571
ARF1	INSR	PPI	0.571428571428571
NFIC	NFIB	PPI	0.571428571428571
MAD2L1	MAD2L1	PPI	0.857142857142857
TTR	TTR	PPI	0.571428571428571
PTMA	CDK2	PPI	0.571428571428571
IL7R	JAK1	PPI	0.571428571428571
SMAD2	CTNNB1	PPI	0.571428571428571
EPB41L3	CNTNAP2	PPI	0.571428571428571
SFRS11	SFRS1	PPI	0.571428571428571
TGFBR1	TGFBR1	PPI	0.571428571428571
SMAD3	ANK3	PPI	0.571428571428571
KRAS	FNTB	PPI	0.571428571428571
THBS1	CALR	PPI	0.714285714285714
CAMK2D	CAMK2D	PPI	0.571428571428571
SOX9	MAF	PPI	0.571428571428571
F11	HGF	PPI	0.857142857142857
MTA1	TP53	PPI	0.714285714285714
CTSL1	IGFBP3	PPI	0.714285714285714
CD74	CD44	PPI	0.571428571428571
BRD4	PRPF40A	PPI	0.571428571428571
PCBP2	PCBP2	PPI	0.571428571428571
NDC80	MAD2L1	PPI	0.714285714285714
FTH1	FTH1	PPI	0.571428571428571
SP1	SP1	PPI	0.714285714285714
SMAD3	TGM2	PPI	0.571428571428571
LIMS1	TGFBR1	PPI	0.571428571428571
F5	PROS1	PPI	0.571428571428571
ARL4A	KPNA2	PPI	0.571428571428571
CD36	CD9	PPI	0.571428571428571
YWHAE	TOP2A	PPI	0.571428571428571
ID1	TCF3	PPI	0.571428571428571
MAPKAPK2	MAPKAPK2	PPI	0.571428571428571
IGFBP3	PLG	PPI	0.714285714285714
MCL1	BCL2L1	PPI	0.571428571428571
RPL5	KPNB1	PPI	0.571428571428571
IGJ	IGHM	PPI	0.714285714285714
IGFBP3	FN1	PPI	0.571428571428571
SP1	BCOR	PPI	0.571428571428571
TP53	SP3	PPI	0.571428571428571
TACC1	AURKA	PPI	0.714285714285714
TCF4	CTNNB1	PPI	0.571428571428571
ZBTB16	ZBTB16	PPI	0.714285714285714
MDH1	GPD1	PPI	0.714285714285714
COL4A2	APP	PPI	0.571428571428571
FN1	SKIL	PPI	0.571428571428571
CTSL1	SLPI	PPI	0.714285714285714
CCL5	VCAN	PPI	1
AKAP13	PPARA	PPI	0.571428571428571
FBLN1	FGB	PPI	0.571428571428571
FEZ1	SMC3	PPI	0.571428571428571
ATXN1	ATXN1	PPI	0.714285714285714
KPNA4	RECQL	PPI	0.714285714285714
RALBP1	CCNB1	PPI	0.571428571428571
ITPR1	LYN	PPI	0.571428571428571
HIST1H1C	NASP	PPI	0.571428571428571
IGF1	IGFBP3	PPI	0.857142857142857
SETDB1	GIPC2	PPI	0.571428571428571
LYN	LYN	PPI	0.571428571428571
CXCL2	CXCL2	PPI	0.857142857142857
FOXP1	FOXP1	PPI	0.857142857142857
ATXN1	SAPS2	PPI	0.714285714285714
SOX13	SOX13	PPI	0.714285714285714
HBA1	PTEN	PPI	0.571428571428571
ATF3	JUN	PPI	0.714285714285714
EGFR	MAP2K1	PPI	0.714285714285714
ITPR1	CCNB1	PPI	0.571428571428571
ABCA1	PDZK1	PPI	0.571428571428571
DLD	DLD	PPI	0.571428571428571
TOMM20	FEZ1	PPI	0.571428571428571
NUP153	NUP153	PPI	0.571428571428571
THBS1	FN1	PPI	0.571428571428571
SMAD4	TGFBR1	PPI	0.571428571428571
AXL	AXL	PPI	0.571428571428571
CASP1	LMNA	PPI	0.714285714285714
MT1F	SHBG	PPI	0.857142857142857
IL8	IL8RB	PPI	0.857142857142857
HDAC4	HDAC4	PPI	0.571428571428571
SNX1	SNX1	PPI	0.571428571428571
PLD1	PLD1	PPI	1
LYN	FCER1G	PPI	0.571428571428571
KLF4	KLF6	PPI	0.714285714285714
BCL2L1	TP53	PPI	0.571428571428571
AURKA	NUF2	PPI	0.857142857142857
MAD2L1	MBL2	PPI	0.571428571428571
SKIL	COL4A2	PPI	0.571428571428571
ESR1	SMAD4	PPI	0.571428571428571
TRIB1	MAP2K4	PPI	0.571428571428571
IGHD	IGHD	PPI	0.714285714285714
PPP2R1B	RAB18	PPI	0.571428571428571
GNAI1	NUMA1	PPI	0.571428571428571
STK38	STK38	PPI	0.571428571428571
MBP	ATXN1	PPI	0.714285714285714
MAP3K11	MAP3K11	PPI	0.571428571428571
S100A8	TP53	PPI	0.714285714285714
ATP5G3	ATP5G3	PPI	0.571428571428571
SSX2IP	SSX2IP	PPI	0.571428571428571
PPP2R1B	STRN3	PPI	0.571428571428571
SQSTM1	TGFBR1	PPI	0.571428571428571
FGFR3	FGFR3	PPI	0.571428571428571
GZMA	GZMA	PPI	0.714285714285714
TCF4	ASCL1	PPI	0.571428571428571
UBE3C	UBE3C	PPI	0.571428571428571
JUNB	FOSB	PPI	0.714285714285714
CCL4	CCL4	PPI	0.571428571428571
CCL2	VCAN	PPI	0.857142857142857
PRKDC	HMGB2	PPI	0.571428571428571
CDC42BPA	CDC42BPA	PPI	0.857142857142857
HIBADH	HIBADH	PPI	0.571428571428571
AKT2	ESR1	PPI	0.571428571428571
PTP4A1	PTP4A1	PPI	0.714285714285714
CDK3	CDK3	PPI	0.571428571428571
SP1	SERPINE1	TRI	0.714285714285714
EGR1	EGFR	TRI	0.714285714285714
SP3	COL1A2	TRI	0.571428571428571
ETS1	VWF	TRI	0.571428571428571
SP1	MT2A	TRI	0.571428571428571
TP53	MDM4	TRI	0.571428571428571
TCF4	IL8	TRI	0.571428571428571
TP53	FRMD4A	TRI	0.571428571428571
ESR1	FOS	TRI	0.571428571428571
TP53	DUSP1	TRI	0.714285714285714
ATF1	ATF3	TRI	0.571428571428571
TP53	HSP90AB1	TRI	0.571428571428571
NR5A2	CETP	TRI	0.714285714285714
STAT1	FOS	TRI	0.714285714285714
KLF6	TGFBR1	TRI	0.571428571428571
FOS	TIMP1	TRI	0.571428571428571
SP1	CAT	TRI	0.571428571428571
EGR1	APOA1	TRI	0.571428571428571
ATF1	SOD2	TRI	0.571428571428571
SP1	HBG1	TRI	0.714285714285714
TP53	PPFIBP1	TRI	0.714285714285714
EGR1	ABCB1	TRI	0.857142857142857
BHLHB2	BHLHB2	TRI	0.571428571428571
PTPRH	FOS	TRI	0.571428571428571
SP1	TGFBR1	TRI	0.571428571428571
TP53	SERPINE1	TRI	0.714285714285714
MYC	MYC	TRI	0.571428571428571
TP53	FAS	TRI	0.714285714285714
FOS	SERPINE1	TRI	0.857142857142857
SP1	RIPK4	TRI	0.714285714285714
FOS	MYC	TRI	0.571428571428571
SP3	PAPSS2	TRI	0.571428571428571
ESR1	PTMA	TRI	0.571428571428571
FLI1	EGR1	TRI	0.571428571428571
TP53	HRAS	TRI	0.571428571428571
ATF3	ATF3	TRI	0.857142857142857
TP53	PTEN	TRI	0.571428571428571
TP53	CHD2	TRI	0.714285714285714
SMAD3	JUN	TRI	0.571428571428571
NFIC	TP53	TRI	0.571428571428571
SP1	DGCR8	TRI	0.571428571428571
SP1	ADH1B	TRI	0.571428571428571
SP1	TK1	TRI	0.571428571428571
KLF13	CCL5	TRI	0.714285714285714
SP1	ASS1	TRI	0.571428571428571
SP1	EPOR	TRI	0.714285714285714
SP1	COL1A2	TRI	0.714285714285714
FOS	JUN	TRI	0.714285714285714
GATA3	CD8A	TRI	0.571428571428571
SP1	EGFR	TRI	0.571428571428571
TP53	GALK2	TRI	0.571428571428571
ETS1	LPAL2	TRI	0.571428571428571
SP1	CETP	TRI	0.714285714285714
ETS1	PSEN1	TRI	0.571428571428571
SP1	DBH	TRI	0.571428571428571
TP53	TMEM30A	TRI	0.571428571428571
CEBPD	CCL5	TRI	0.571428571428571
IKZF1	CD8A	TRI	0.571428571428571
NFIC	APOB	TRI	0.571428571428571
SP1	LCAT	TRI	0.571428571428571
SP1	TIAM1	TRI	0.571428571428571
SP1	PTP4A1	TRI	0.571428571428571
TP53	FIGNL1	TRI	0.571428571428571
FOS	MT2A	TRI	0.571428571428571
SP1	TFPI2	TRI	0.714285714285714
SP1	HSPB1	TRI	0.571428571428571
STAT1	CCL2	TRI	0.714285714285714
LEF1	LEF1	TRI	0.571428571428571
PBX1	UGT2B17	TRI	0.571428571428571
MYC	TP53	TRI	0.571428571428571
JUN	CCL5	TRI	0.714285714285714
EGR1	PTP4A1	TRI	0.714285714285714
SP1	COL4A2	TRI	0.714285714285714
SP1	CD53	TRI	0.571428571428571
NR1I3	CYP2C9	TRI	0.571428571428571
EGR1	EGR1	TRI	1
ETS2	CDC2	TRI	0.714285714285714
NR5A2	ABCC3	TRI	0.714285714285714
JUN	JUN	TRI	0.714285714285714
TP53	LYST	TRI	0.571428571428571
SP1	PAPSS2	TRI	0.714285714285714
STAT1	IFIT2	TRI	0.571428571428571
SP1	COL4A1	TRI	0.571428571428571
SP1	PSEN1	TRI	0.571428571428571
TP53	TLE1	TRI	0.571428571428571
RNF130	FOS	TRI	0.571428571428571
SP1	HRAS	TRI	0.571428571428571
ETS2	SCARA5	TRI	0.571428571428571
SMAD3	COL1A2	TRI	0.714285714285714
SP1	COL1A1	TRI	0.571428571428571
EGR2	ABCB1	TRI	0.714285714285714
SP1	PECAM1	TRI	0.571428571428571
ATF2	CCL5	TRI	0.571428571428571
PPARA	PTGS2	TRI	0.571428571428571
ATF2	ATF3	TRI	0.571428571428571
SP1	TFRC	TRI	0.571428571428571
FOS	HLA-DRA	TRI	0.714285714285714
STAT1	INDO	TRI	0.571428571428571
SP1	HSPA8	TRI	0.571428571428571
SP1	ABCB1	TRI	0.714285714285714
SP1	SP3	TRI	0.571428571428571
ATF3	SELE	TRI	0.571428571428571
SP1	CDK2	TRI	0.571428571428571
TP53	TP53	TRI	0.714285714285714
STAT1	MYC	TRI	0.571428571428571
STAT1	STAT1	TRI	0.857142857142857
TP53	EHD3	TRI	0.571428571428571
FOS	HBA1	TRI	0.714285714285714
STAT1	IFI6	TRI	0.571428571428571
SP1	PLAUR	TRI	0.714285714285714
TP53	TCF7L2	TRI	0.571428571428571
EGR1	PDGFA	TRI	0.571428571428571
FOS	FOS	TRI	0.857142857142857
FOS	TP53	TRI	0.571428571428571
TP53	USP34	TRI	0.571428571428571
TP53	EGFR	TRI	0.571428571428571
TP53	HIGD1A	TRI	0.571428571428571
EGR1	TP53	TRI	0.714285714285714
PPARA	LPAL2	TRI	0.571428571428571
SP1	APP	TRI	0.571428571428571
TP53	RABGAP1L	TRI	0.571428571428571
ETS2	VWF	TRI	1
NR5A2	CYP7A1	TRI	0.571428571428571
CEBPD	APOB	TRI	0.571428571428571
NFIC	JUN	TRI	0.571428571428571
SP1	CCL2	TRI	0.571428571428571
TP53	CYP3A7	TRI	0.571428571428571
ATF2	ATF2	TRI	0.571428571428571
MAZ	MAZ	TRI	0.571428571428571
CEBPD	PTGS2	TRI	0.571428571428571
NR5A2	ALB	TRI	0.714285714285714
SMAD4	JUN	TRI	0.571428571428571
SP1	HBE1	TRI	0.571428571428571
SP3	PLAUR	TRI	0.571428571428571
JUN	TP53	TRI	0.571428571428571
JUN	EDN1	TRI	0.714285714285714
SP1	MCL1	TRI	0.571428571428571
SP1	LPAL2	TRI	0.714285714285714
SP1	SSFA2	TRI	0.571428571428571
SP1	HBA1	TRI	0.714285714285714
TP53	HELLS	TRI	0.571428571428571
SP1	APOB	TRI	0.571428571428571
SMAD3	SERPINE1	TRI	0.714285714285714
AR	AR	TRI	0.571428571428571
SP3	SP1	TRI	0.571428571428571
FOS	EDN1	TRI	0.714285714285714
BAG1	FOS	TRI	0.571428571428571
TP53	CASP1	TRI	0.714285714285714
SP1	SP1	TRI	0.714285714285714
SP1	FOS	TRI	0.571428571428571
TP53	GALNT11	TRI	0.571428571428571
CEBPD	CRP	TRI	0.571428571428571
TP53	TLR3	TRI	0.571428571428571
FOXA2	APOB	TRI	0.571428571428571
SP1	FAS	TRI	0.571428571428571
TP53	CX3CL1	TRI	0.571428571428571
SMAD4	SERPINE1	TRI	0.857142857142857
CEBPD	IL8	TRI	0.571428571428571
ETS2	PSEN1	TRI	0.571428571428571
TP53	ATF3	TRI	0.714285714285714
TP53	CHN2	TRI	0.571428571428571
KLF11	HBE1	TRI	0.571428571428571
SP1	CD14	TRI	0.571428571428571
SP1	FN1	TRI	0.571428571428571
STAT1	CYBB	TRI	0.571428571428571
CREM	CYP51A1	TRI	0.571428571428571
TP53	KLHDC4	TRI	0.571428571428571
TP53	CPN1	TRI	0.714285714285714
TP53	PDGFC	TRI	0.571428571428571
ATF1	CCNA2	TRI	0.571428571428571
ETS1	CD53	TRI	0.571428571428571
SP1	INSR	TRI	0.571428571428571
FLI1	COL1A2	TRI	0.571428571428571
SP1	CD74	TRI	0.571428571428571
TP53	IGFBP3	TRI	0.714285714285714
TP53	PTGS2	TRI	0.714285714285714
EGR1	PECAM1	TRI	0.571428571428571
ETS2	ANPEP	TRI	0.571428571428571
KLF13	CYP1A1	TRI	0.571428571428571
SP1	COMT	TRI	0.571428571428571
SP3	SERPINE1	TRI	0.571428571428571
TP53	CAMK2D	TRI	0.571428571428571
ETS2	MSR1	TRI	0.571428571428571
JUN	ATF3	TRI	0.714285714285714
SP1	CXCR4	TRI	0.571428571428571
SP1	HBB	TRI	0.714285714285714
TP53	ANKRD11	TRI	0.714285714285714
FOS	CCL4	TRI	0.571428571428571
SP1	HMOX1	TRI	0.571428571428571
SP1	HSPA1B	TRI	0.571428571428571

## Sheet: BCLC stage C HCC
Protein1	Protein2	Iteraction type	Frequence
ETS2	NCOR1	PPI	0.625
AR	CDK6	PPI	0.5
MAPK1	SOS1	PPI	0.5
ATIC	ATIC	PPI	0.5
PLAG1	KPNA2	PPI	0.625
ITPR2	TRPC1	PPI	0.5
IL23A	IL23A	PPI	0.5
LCK	MED28	PPI	0.625
APOA1	APOF	PPI	0.625
CLU	PON1	PPI	0.625
CEP55	AKAP9	PPI	0.5
CDC20	TGFBR1	PPI	0.5
NDC80	NDC80	PPI	1
SERPINE1	IGFBP5	PPI	0.75
PZP	CPB2	PPI	0.5
CDK5	TP53	PPI	0.625
CSE1L	RAN	PPI	0.75
SPEN	NCOR1	PPI	0.625
AMBP	AMBP	PPI	0.5
TES	TES	PPI	0.75
SOCS3	CXCR4	PPI	0.5
ALB	AGA	PPI	0.625
SGOL2	PPP2R1B	PPI	0.625
TPD52L1	TPD52L1	PPI	0.875
FADD	RALBP1	PPI	0.5
C1S	C1QA	PPI	0.5
FN1	COL1A2	PPI	1
CXCL12	FN1	PPI	0.875
CFH	THBS1	PPI	0.5
CCNB2	CDC2	PPI	1
AGL	PRKAB1	PPI	0.75
EID2B	EID2B	PPI	0.5
PRKCD	PEBP1	PPI	0.5
XK	PRKCA	PPI	0.75
BHLHB2	BHLHB2	PPI	0.625
PLCG1	CTSS	PPI	0.5
MMP9	PLG	PPI	0.5
PRPF40A	PRPF40A	PPI	0.75
ESR1	ESR1	PPI	1
SHC1	SOS1	PPI	0.625
GLS2	PAG1	PPI	0.625
CRP	CRP	PPI	0.875
RRM1	RRM2	PPI	0.5
LCK	SHC1	PPI	0.5
TJP2	CLDN1	PPI	0.5
FBLN1	FN1	PPI	0.625
CHEK1	TP53	PPI	0.625
SPARC	PLG	PPI	0.5
CEP55	MAPK1	PPI	0.5
TBL1XR1	NCOR1	PPI	0.5
PPARBP	PPARBP	PPI	0.75
CD74	CD74	PPI	0.5
INSR	SHC1	PPI	0.625
LDLR	APOB	PPI	0.5
DTNA	SNTB1	PPI	0.5
CLEC3B	CLEC3B	PPI	0.875
DNMT3A	DNMT1	PPI	0.75
MID1	MID1	PPI	0.875
BRD7	RIF1	PPI	0.5
IRAK2	IRAK2	PPI	0.5
NCOA2	RXRA	PPI	0.5
GHR	GHR	PPI	1
PLK1	MCM7	PPI	0.5
HSP90AB1	HSP90AB1	PPI	1
TP53	NFYA	PPI	0.5
PPID	SMURF2	PPI	0.75
ESR1	TRIM59	PPI	0.75
ATF3	ATF3	PPI	1
SMARCA4	TMF1	PPI	0.625
SOCS3	IL6ST	PPI	0.625
GNAO1	RGS1	PPI	0.5
ACOX1	SCP2	PPI	0.625
GFRA1	RET	PPI	0.5
BAT1	STRN4	PPI	0.5
NDRG1	CDH1	PPI	0.5
TACSTD1	TACSTD1	PPI	0.625
IL1RAP	IL1B	PPI	0.625
SERPINA5	SERPINA5	PPI	0.5
CLDN1	CLDN1	PPI	0.625
GPHN	GPHN	PPI	0.75
CSF2RB	PRKCB1	PPI	0.5
UBE2I	CBX4	PPI	0.5
TP53	CDKN2C	PPI	0.75
UGP2	UGP2	PPI	0.75
PTN	PTN	PPI	0.5
CCNB1	PBK	PPI	1
SOCS3	GHR	PPI	0.75
KNG1	CTSS	PPI	0.625
AR	ESR1	PPI	0.625
STAT1	MDK	PPI	0.75
GRK5	GRK5	PPI	0.5
MAPK13	MBP	PPI	0.5
SQSTM1	SQSTM1	PPI	0.875
CXCR4	ADRBK2	PPI	0.5
MX1	TRPC1	PPI	0.5
FGFR4	FGFR4	PPI	0.5
TP53	CCNA2	PPI	0.75
CNOT6	CNOT6	PPI	0.625
MAP3K7	FOS	PPI	0.5
IL1RAP	IRAK1	PPI	0.5
KITLG	EPOR	PPI	0.5
SKAP1	LYN	PPI	0.625
MCM10	MCM4	PPI	0.625
RECK	MMP9	PPI	0.5
HLA-DRB1	HLA-DRA	PPI	0.625
MAPKAPK2	HSPB1	PPI	0.5
SPARC	PDGFA	PPI	0.625
DTNA	UTRN	PPI	0.625
CDH1	RRM2	PPI	0.625
EXOSC4	UPF3B	PPI	0.625
SULT1C2	SULT1C2	PPI	0.875
RAN	SMURF2	PPI	0.75
GLMN	FKBP1A	PPI	0.5
OPTN	FOS	PPI	0.5
SMAD2	MAPK9	PPI	0.5
BIN1	FBP1	PPI	0.5
C5	C5	PPI	0.5
DDEF2	REPS2	PPI	0.75
TBX3	TBX3	PPI	0.625
F13A1	F13A1	PPI	0.5
ABCG1	ABCG1	PPI	0.625
CDCA8	CDCA8	PPI	0.5
SORD	SORD	PPI	0.625
ITGAV	SPP1	PPI	0.5
ANXA2	APOH	PPI	0.75
GPSM2	GNAO1	PPI	0.625
S100A9	S100A9	PPI	0.875
PLG	S100A10	PPI	0.5
SMARCA2	ESR1	PPI	0.625
WASF2	WASF2	PPI	0.5
MMP9	PZP	PPI	0.875
FOS	LMNA	PPI	0.875
TPM1	JUN	PPI	0.5
THBS1	SPARC	PPI	0.875
DOCK8	RHOQ	PPI	0.5
COL4A1	SAA4	PPI	0.875
LAMA4	BRD7	PPI	0.5
CDC2	PTPN1	PPI	0.625
SGTB	TMPO	PPI	0.5
PBX2	PBX2	PPI	0.5
EZH2	SUZ12	PPI	0.75
MAPK1	DUSP1	PPI	0.5
HAMP	SLC40A1	PPI	0.625
GADD45G	RXRA	PPI	0.625
PRKCE	PRKCE	PPI	0.5
MCM10	MCM6	PPI	0.875
ASL	ASL	PPI	0.75
TPD52L1	TPD52	PPI	0.625
EPAS1	EIF3S6	PPI	0.5
PECAM1	PECAM1	PPI	0.625
STK4	STK4	PPI	0.5
STAT1	IRF1	PPI	0.5
F5	F5	PPI	0.75
CDC45L	POLA1	PPI	0.5
TPR	MAPK1	PPI	0.5
MCM4	ORC6L	PPI	0.625
PLAT	SERPINI1	PPI	0.5
PLAT	PLAT	PPI	0.625
PLA2G2A	VCAN	PPI	0.625
THBS1	MMP9	PPI	0.75
CXCR4	PTPRC	PPI	0.75
SOX4	UBE2I	PPI	0.5
C20orf20	TRRAP	PPI	0.5
LYN	CSF2RB	PPI	0.625
KPNB1	TP53	PPI	0.625
SH3KBP1	SOS1	PPI	0.5
SFN	C8orf32	PPI	0.625
SOCS7	PLCG1	PPI	0.5
GGA3	AP1GBP1	PPI	0.625
YWHAG	RACGAP1	PPI	0.5
FNTB	CENPF	PPI	0.5
CCNB2	MCM2	PPI	0.875
PPARA	PPARA	PPI	0.5
CDC20	CCNA2	PPI	1
SH3RF1	SEMA6A	PPI	0.5
SLAMF7	SLAMF7	PPI	0.625
LOX	LOX	PPI	0.875
PCDH17	UBQLN4	PPI	0.5
PIK3R1	ESR1	PPI	0.5
DPP4	ADA	PPI	0.5
CBX3	LBR	PPI	0.5
THY1	ITGAV	PPI	0.5
IL1RAP	PIK3R1	PPI	0.5
PPARBP	TP53	PPI	0.625
NBR1	NBR1	PPI	0.75
S100P	S100P	PPI	0.75
NBN	TERF1	PPI	0.625
KITLG	KITLG	PPI	0.625
SRGN	UBQLN4	PPI	0.875
HDAC2	TOP2A	PPI	0.75
CXCL12	CXCL12	PPI	0.875
ANKRD11	NCOA2	PPI	0.5
SKAP1	LCK	PPI	0.5
TPM2	TPM1	PPI	0.625
ESR1	SOS1	PPI	0.875
DAB2	TGFBR1	PPI	0.5
BIN1	ITGA6	PPI	0.5
MELK	CDC5L	PPI	0.5
CLEC3B	HGF	PPI	0.875
SMAD2	DYNC1H1	PPI	0.5
PAFAH1B3	BRD7	PPI	0.625
LYN	HCLS1	PPI	0.5
SYNJ2	GRB2	PPI	0.5
SHC1	LTK	PPI	0.5
PRKCA	SLC1A1	PPI	0.625
KSR1	MAP2K1	PPI	0.625
CDC45L	MCM3	PPI	0.5
LYN	FCGR2B	PPI	0.5
VWF	COL1A2	PPI	0.75
CSF2RB	CSF2RB	PPI	0.625
GADD45G	ESR1	PPI	1
CDC2	PBK	PPI	1
FCGR2B	LY6E	PPI	0.75
TGFB1	SPARC	PPI	0.5
TP53	HSPA1A	PPI	0.5
ZNF295	YWHAG	PPI	0.5
S100A9	S100A8	PPI	0.75
TP53	TOP2A	PPI	0.75
MEP1B	MEP1B	PPI	0.5
TOPBP1	EDD1	PPI	0.5
KPNB1	KPNB1	PPI	0.875
SRGN	ALB	PPI	0.75
FNTA	CENPF	PPI	0.625
RACGAP1	CHN2	PPI	0.625
CASP2	CFLAR	PPI	0.5
TRAF5	CD27	PPI	0.5
BCOR	MLLT3	PPI	0.5
NDRG1	MME	PPI	0.625
JAG1	THBS1	PPI	0.5
FYB	LCP2	PPI	0.5
PCBP2	PRPF40A	PPI	0.625
ENPEP	ENPEP	PPI	0.875
TFPI	MMP12	PPI	0.625
PDCD2	NCOR1	PPI	0.625
SMAD2	NCOA6	PPI	0.5
RRAS2	PTPN1	PPI	0.5
HIST1H2BG	PTMA	PPI	0.75
BCOR	HDAC6	PPI	0.5
H2AFZ	H2AFZ	PPI	0.75
EHHADH	SCP2	PPI	0.625
FBN1	VCAN	PPI	0.625
CDC2	ECT2	PPI	1
ITGA2	ITGA2	PPI	1
C1S	C1S	PPI	0.875
ATP6AP1	HBA1	PPI	0.5
CBS	CBS	PPI	0.625
MCM10	CEP70	PPI	0.625
CDC5L	MCM4	PPI	0.5
SERPING1	SELE	PPI	0.5
THBS1	DCN	PPI	0.75
SERPINE2	COL4A1	PPI	0.75
SCAMP1	SCAMP1	PPI	1
MASP1	MBL2	PPI	0.75
PLEK	PLEK	PPI	0.5
PPID	HSP90AB1	PPI	0.75
NPR3	NPR3	PPI	1
TP53	TP53	PPI	0.75
LYN	PRKCD	PPI	0.625
HSPA1A	NQO1	PPI	0.5
EED	EED	PPI	0.625
EXOSC4	EXOSC4	PPI	0.875
CHI3L1	CHI3L1	PPI	1
GHR	PIK3R1	PPI	0.5
CLEC3B	PLAT	PPI	0.5
DPP4	CXCL12	PPI	0.625
FOSL2	JUN	PPI	0.5
TP53	SCAMP1	PPI	0.75
CLSTN1	KIF2A	PPI	0.625
NQO1	NQO1	PPI	0.875
ESR1	TUBA1B	PPI	0.625
VIPR1	PTMA	PPI	0.75
SPP1	IGFBP5	PPI	0.75
PRKDC	LYN	PPI	0.625
ATXN1	ZHX2	PPI	0.5
CDC2	LMNA	PPI	0.875
NCOA2	AR	PPI	0.5
ADAM9	PRKCD	PPI	0.625
F11	F2	PPI	0.5
YWHAB	CDC25C	PPI	0.5
FOS	JUNB	PPI	0.625
CDH11	CTNNB1	PPI	0.5
SETDB1	TOB1	PPI	0.625
SETDB1	OLFML3	PPI	0.5
COIL	COIL	PPI	0.5
AKAP9	PRKAR2B	PPI	0.625
PPARBP	ESR1	PPI	0.75
BCR	SFN	PPI	0.5
PTPN1	INSR	PPI	0.5
APOA1	TTR	PPI	0.5
TNFRSF19	TRAF5	PPI	0.625
CD47	FAS	PPI	0.5
TARDBP	SETDB1	PPI	0.5
YWHAG	PABPC1	PPI	0.5
F2	SERPINE1	PPI	0.625
SOCS2	EPOR	PPI	0.625
CTSB	IGF1	PPI	0.625
BCR	BCR	PPI	0.5
FEZ1	RIF1	PPI	0.5
HDAC2	CDH1	PPI	0.5
SLC16A2	SERPINA7	PPI	0.75
YWHAZ	TJP2	PPI	0.5
MMP9	COL1A1	PPI	0.875
KPNB1	TERF1	PPI	0.5
PLG	SERPINC1	PPI	0.5
VIM	VIM	PPI	0.625
TPM2	JUN	PPI	0.5
SRGAP2	ROBO1	PPI	0.5
EED	TGS1	PPI	0.625
MCM5	ORC6L	PPI	0.75
EED	HDAC2	PPI	0.5
ESR1	CDC25B	PPI	0.625
CCL20	VCAN	PPI	0.75
ITK	ITK	PPI	0.625
CPSF1	MCM2	PPI	0.625
SLC22A1	POU2AF1	PPI	0.625
HLA-F	HLA-F	PPI	0.625
ESR1	UBE2I	PPI	0.625
SHC1	PAK1	PPI	0.5
FOS	STAT1	PPI	0.75
MAPK1	LIFR	PPI	0.5
SF1	FUS	PPI	0.5
RAD1	FEN1	PPI	0.625
PAK1	PRKCD	PPI	0.5
SOX9	HSPA1A	PPI	0.625
GPLD1	APOA1	PPI	0.625
ALDH5A1	ABAT	PPI	0.625
BIN1	BIN1	PPI	0.5
UBE2I	STAT1	PPI	0.5
TK1	TP53	PPI	0.625
TNFSF13B	TNFSF13B	PPI	0.5
PTK2	SELE	PPI	0.875
CBX1	DNMT1	PPI	0.75
BICD2	BICD2	PPI	0.5
NME1	C8orf32	PPI	0.5
VIM	TRIM28	PPI	0.5
PLG	HRG	PPI	0.5
C7	PLG	PPI	0.5
LCK	LCP2	PPI	0.5
CDC2	LMNB1	PPI	0.625
PDK4	PDK4	PPI	1
JUN	TOP1	PPI	0.5
TP53	LAMA4	PPI	0.625
MCM5	MCM3	PPI	0.875
YWHAG	MCM5	PPI	0.5
F9	F7	PPI	0.625
INDO	PPP1R16A	PPI	0.625
MKI67	PRKCB1	PPI	0.625
AR	IL6ST	PPI	0.625
LIPC	APOB	PPI	0.625
CTSB	S100A10	PPI	0.625
SYT1	SYT1	PPI	0.625
PTK2	GRB2	PPI	0.5
CDC25C	LCK	PPI	0.5
CAP2	PRPF40A	PPI	0.75
PCNA	CDC2	PPI	0.875
THBS1	IGFBP5	PPI	0.625
NEK2	MAPK1	PPI	0.5
CDC2	NDE1	PPI	0.625
NUP62	PTMA	PPI	0.5
PEBP1	PEBP1	PPI	0.5
SHC1	PRKCD	PPI	0.5
RPS6KA3	RPS6KA3	PPI	0.625
MIF	TP53	PPI	0.5
GSPT1	GSPT1	PPI	0.5
PCNA	PCNA	PPI	0.875
CDKN2A	ANKRD12	PPI	0.5
LGALS3BP	LGALS3BP	PPI	0.875
PTPRC	PTPRC	PPI	0.875
ITGB8	TGFB1	PPI	0.5
DNMT1	DNMT1	PPI	0.75
ANXA2	S100A10	PPI	0.875
CSE1L	STAT1	PPI	0.625
SMARCA4	TP53	PPI	0.75
BCL6	BCL6	PPI	0.5
F2	SERPINC1	PPI	0.5
NDRG1	HNRPU	PPI	0.5
KPNB1	PTMA	PPI	0.75
PAG1	SHC1	PPI	0.5
MAL2	TPD52L1	PPI	0.625
SERPINA5	KLKB1	PPI	0.5
ITGA9	ITGA9	PPI	0.625
TIAM1	PRKCE	PPI	0.5
DCLRE1C	PRKDC	PPI	0.625
CD8A	HLA-C	PPI	0.5
UBQLN4	NOTCH2NL	PPI	0.625
TGFB1	FNTA	PPI	0.5
TGFBR1	UBD	PPI	0.5
SOS1	FYN	PPI	0.5
EED	EZH2	PPI	0.625
CAD	CAD	PPI	0.5
SPAG5	CDC2	PPI	0.75
ADRA1A	RGS2	PPI	0.75
ATXN1	EIF1AY	PPI	0.5
GRB2	ESR1	PPI	0.625
SHC1	LYN	PPI	0.5
CD46	CD46	PPI	0.625
GCDH	GCDH	PPI	0.75
AR	AR	PPI	0.625
YWHAB	INSR	PPI	0.5
FN1	PRPF40A	PPI	0.75
PTK2	PTK2	PPI	0.875
TP53	SMAD2	PPI	0.5
HSP90AB1	ESR1	PPI	1
PPP2R1B	CDC2	PPI	0.625
SFN	ZFP36	PPI	0.625
STK17A	STK17A	PPI	0.75
CLSTN1	CLSTN1	PPI	0.625
HSPH1	CFL1	PPI	0.5
HABP2	KNG1	PPI	0.5
ERBB3	NRG1	PPI	0.5
S100A11	S100A11	PPI	0.625
ESR1	HSPA4	PPI	0.75
COL4A1	COL4A1	PPI	0.875
CD84	CD84	PPI	0.5
TNFRSF10A	TNFRSF10A	PPI	0.5
MAD2L1	CSF2RB	PPI	0.625
PON1	ALB	PPI	0.75
GADD45G	GADD45B	PPI	0.875
SMAD2	KHDRBS1	PPI	0.5
NFYA	JUN	PPI	0.5
GSTA4	GSTA4	PPI	0.5
NCOA7	ESR1	PPI	0.5
MCM10	CDK6	PPI	0.75
UTP14A	PDCD5	PPI	0.625
PLCG1	LIFR	PPI	0.5
SHC1	ESR1	PPI	0.75
MAGI2	MAGI2	PPI	0.5
NCOA3	RXRA	PPI	0.5
HGS	MIF4GD	PPI	0.75
AQP1	AQP1	PPI	0.75
CBL	ITCH	PPI	0.5
SMURF2	SPG20	PPI	0.75
PCNA	CDC25C	PPI	0.75
CDC20	CDC20	PPI	1
AURKB	CENPA	PPI	0.625
AR	CCNE1	PPI	0.5
KRT19	ABI2	PPI	0.5
CDC2	PTTG1	PPI	1
HMOX1	HMOX1	PPI	0.75
C8B	C8A	PPI	0.875
SIP1	SIP1	PPI	0.625
FAP	FAP	PPI	0.625
KIF11	KIF11	PPI	1
NDE1	TUBG1	PPI	0.625
SNRPB	SNRPB	PPI	0.625
YWHAB	SRRM2	PPI	0.625
SYNCRIP	INSR	PPI	0.5
GRK5	AVPR1A	PPI	0.5
KLKB1	HGFAC	PPI	0.875
FAS	PRKCA	PPI	0.625
C1R	C1QA	PPI	0.5
CDC2	DUT	PPI	0.625
IL1B	IL1B	PPI	0.625
STK3	STK3	PPI	0.5
U2AF2	KIAA0907	PPI	0.5
GBP5	GBP5	PPI	0.5
SQSTM1	LCK	PPI	0.5
S100A8	RAB17	PPI	0.75
GRB2	CBL	PPI	0.5
SMURF2	DAB2	PPI	0.625
MMP9	TFPI	PPI	0.75
CCR1	CCL4	PPI	0.5
ROBO1	TUBB3	PPI	0.5
SMAD2	SMAD2	PPI	0.625
DMD	KRT19	PPI	0.5
BLM	FEN1	PPI	0.5
CDK6	CDK6	PPI	0.875
DEFB1	RIF1	PPI	0.5
PRKCA	HSPA1A	PPI	0.625
DAB2	CDC2	PPI	0.625
CCNB1	CDC2	PPI	1
PRKCD	PRKCD	PPI	0.625
PTPRC	SKAP1	PPI	0.75
GBP2	PAFAH1B3	PPI	0.5
MAPK1	TCF3	PPI	0.5
PLK4	PLK4	PPI	0.5
SH3RF1	RACGAP1	PPI	0.5
YWHAZ	YWHAZ	PPI	0.875
PLG	APOH	PPI	0.5
GMNN	MCM6	PPI	0.75
HSPB8	HSPB8	PPI	0.5
RET	RET	PPI	0.5
MAP2K1	MAP2K1	PPI	0.875
MEP1B	FN1	PPI	0.5
MATN2	MATN2	PPI	0.625
CDC2	MCM4	PPI	0.75
CXCR4	CXCR4	PPI	0.75
SMAD2	KPNB1	PPI	0.625
MAOA	MAOA	PPI	0.625
POLA1	CDC2	PPI	0.625
CASP8	CASP8	PPI	0.625
IL1RL1	IL33	PPI	0.875
BCR	PLCG1	PPI	0.5
WASF2	ABI2	PPI	0.5
ADAMTS13	VWF	PPI	0.625
SKAP1	GRB2	PPI	0.5
LEPR	LEPR	PPI	0.875
MDK	TSPAN1	PPI	0.5
YWHAZ	CDC25B	PPI	0.625
TCF3	TCF3	PPI	0.75
PLK1	ECT2	PPI	0.5
THRAP4	PPARA	PPI	0.5
CDC7	MCM3	PPI	0.75
MTUS1	MTUS1	PPI	0.5
HGS	UBE2I	PPI	0.625
TCERG1	HSPA1A	PPI	0.5
PCNA	CDK5	PPI	0.5
DAB2	MYO6	PPI	0.5
CD36	ITGA6	PPI	0.625
UBQLN4	PBXIP1	PPI	0.625
SCG5	UBQLN4	PPI	0.5
RIT1	RALGDS	PPI	0.5
PPAP2B	SHC1	PPI	0.75
GGA1	AP1GBP1	PPI	0.5
COL4A5	DCN	PPI	0.5
KCNK1	UBE2I	PPI	0.625
FN1	CRP	PPI	0.875
CLEC4M	CLEC4M	PPI	1
CSRP1	CSRP1	PPI	0.5
ADH1A	ADH1A	PPI	0.75
SHC1	NGFR	PPI	0.5
HEY1	HEY1	PPI	0.875
DGAT1	DGAT1	PPI	0.5
HSPA4	CDC73	PPI	0.5
SOCS2	GHR	PPI	1
MGST1	MGST1	PPI	0.5
KPNA2	LEF1	PPI	1
KHDRBS3	KHDRBS3	PPI	0.5
ESR1	GNAI1	PPI	0.5
NEU1	CTSA	PPI	0.75
YES1	YES1	PPI	0.5
YWHAZ	TBXA2R	PPI	0.5
ZHX2	NFYA	PPI	0.625
TOB1	MARCKS	PPI	0.5
DBF4	MCM2	PPI	0.625
INSR	PTK2	PPI	0.875
CDKN2C	CDKN2A	PPI	1
THBS1	COL1A1	PPI	0.875
CKAP5	AURKA	PPI	0.75
QDPR	QDPR	PPI	0.5
CLU	C9	PPI	0.75
CDC2	RRM2	PPI	1
TNPO1	TNPO1	PPI	0.625
SOCS3	INSR	PPI	0.625
AKAP12	ADRB2	PPI	0.625
CBX1	TRIM28	PPI	0.75
SMURF2	ARHGAP5	PPI	0.5
CD36	COL1A2	PPI	0.625
THBS2	MMP2	PPI	0.5
TMPRSS6	FN1	PPI	0.875
NIN	NIN	PPI	0.75
KHDRBS1	KHDRBS1	PPI	0.75
CHEK1	CDC25B	PPI	0.625
VIPR1	GNAI1	PPI	0.5
CDC2	KIF11	PPI	1
KHDRBS1	LYN	PPI	0.625
PRKDC	PCNA	PPI	0.625
MAP2	GRB2	PPI	0.5
ANGPTL3	ITGAV	PPI	0.5
RAP2A	RAP2A	PPI	1
PRKAG2	PRKAB1	PPI	0.75
PTGS2	TP53	PPI	0.75
HSP90AB1	TP53	PPI	0.75
AGR2	UBQLN4	PPI	0.5
HGF	HGF	PPI	1
RAB27A	EXPH5	PPI	0.625
PCTK1	PCTK1	PPI	0.625
F2	SPP1	PPI	0.625
SNTB2	SNTB2	PPI	0.5
EPRS	SYNCRIP	PPI	0.625
TPR	IFI16	PPI	0.75
GSTA1	GSTA1	PPI	0.625
TOP1	TOP1	PPI	0.625
RASGRP1	DGKZ	PPI	0.5
MCL1	MCL1	PPI	0.5
GZMA	HMGB2	PPI	0.5
CDK5	PCTK1	PPI	0.5
CA12	CA12	PPI	0.5
PRKAR2B	PRKAR2B	PPI	0.875
TAPBP	TAP2	PPI	0.5
INSR	FABP4	PPI	0.5
MVP	ESR1	PPI	0.5
RFC3	RFC4	PPI	0.625
SGK	KPNA2	PPI	0.75
MMP1	CCL2	PPI	0.5
HMGA1	RXRA	PPI	0.625
LY96	TLR4	PPI	0.625
KHDRBS1	GRB2	PPI	0.625
HSPD1	HSPD1	PPI	0.625
PRKCA	GPM6A	PPI	0.75
PAK1	MAP2K1	PPI	0.5
ITCH	CPSF6	PPI	0.75
ITGB3BP	RXRA	PPI	0.5
TP53	CDC2	PPI	0.75
CDC7	CDK4	PPI	0.5
ANAPC7	CDC20	PPI	0.625
HBD	HBD	PPI	0.625
GGA1	SORL1	PPI	0.5
GADD45B	CDC2	PPI	0.875
JUNB	BCL6	PPI	0.5
SLC31A1	SLC31A1	PPI	1
IGHM	PTK2	PPI	0.625
MTMR2	MTMR2	PPI	0.875
PPARGC1A	ESR1	PPI	0.75
UBE2Z	TGFBR1	PPI	0.5
CENPH	CENPH	PPI	0.625
KPNA2	RECQL	PPI	0.625
APOA1	APOB	PPI	0.5
MAPK1	PLCB1	PPI	0.5
CANT1	CANT1	PPI	0.625
RAD54B	UBE2I	PPI	0.5
PABPC1	PCBP2	PPI	0.5
TRIM39	TRIM39	PPI	0.5
ENAH	ENAH	PPI	0.875
TRIP13	PLSCR4	PPI	0.75
SLC1A2	SLC1A2	PPI	0.875
ZFPM2	UBQLN4	PPI	0.5
CENPF	CENPF	PPI	1
NCOA3	DDX17	PPI	0.5
PCSK6	PCSK6	PPI	0.75
KLKB1	KNG1	PPI	0.625
PRKCA	PEA15	PPI	0.5
MCM8	MCM6	PPI	0.75
DACH1	SIX1	PPI	0.5
THRAP4	RXRA	PPI	0.625
FN1	F13A1	PPI	0.5
KHK	KHK	PPI	0.625
SIX1	SIX1	PPI	0.625
SOS1	SOS1	PPI	0.875
COL4A2	SAA1	PPI	0.75
SHARPIN	SHARPIN	PPI	0.5
NFAT5	NFAT5	PPI	0.875
NFYA	NFYA	PPI	0.625
ARG1	ARG2	PPI	0.625
PPARGC1A	NR1H4	PPI	0.5
SBF1	MTMR2	PPI	0.5
PRKCB1	GJA1	PPI	0.5
MELK	CDC25B	PPI	0.625
DYRK2	RAD54B	PPI	0.5
SYNE1	SYNE1	PPI	0.625
TRIP13	PBLD	PPI	0.875
TPD52L1	YWHAB	PPI	0.625
LCK	LCK	PPI	0.625
ICAM1	ICAM1	PPI	0.75
HBA2	HBA2	PPI	0.625
CDC7	MCM2	PPI	0.75
DCN	COL4A1	PPI	0.75
MKI67	MKI67	PPI	0.875
HBG2	HBG2	PPI	0.625
YWHAB	RACGAP1	PPI	0.625
NR1I2	PPARGC1A	PPI	0.75
DACH1	NCOR1	PPI	0.5
CDC2	RAP1GAP	PPI	0.5
SERPINA1	SERPINA1	PPI	0.625
TP53	SULT1E1	PPI	0.625
KIF4A	TTF2	PPI	0.625
MMAA	MUT	PPI	0.75
HSPA2	CDC2	PPI	0.625
MCAM	FYN	PPI	0.5
SETDB1	SULT1E1	PPI	0.625
ADRB2	GRB2	PPI	0.625
PIAS3	NCOA2	PPI	0.5
PLAT	ANXA2	PPI	0.625
SHC1	EPOR	PPI	0.5
CASP8	RALBP1	PPI	0.5
SKAP1	FYN	PPI	0.5
TNFRSF11B	THBS1	PPI	0.75
MKI67	CBX5	PPI	0.5
MUC20	MUC20	PPI	0.625
TOLLIP	TOLLIP	PPI	0.5
FNTB	RAP2A	PPI	0.5
KLKB1	HGF	PPI	1
F12	APOH	PPI	0.625
MDC1	MDC1	PPI	0.625
IGFALS	IGF1	PPI	0.875
SOD2	SOD2	PPI	0.75
HSPB1	CRYAA	PPI	0.875
PTPN1	GRB2	PPI	0.5
BHMT	BHMT	PPI	0.75
CD47	PTK2	PPI	0.625
PFN2	PFN2	PPI	0.5
HABP2	COL4A1	PPI	0.5
C1R	C1QB	PPI	0.5
MATN2	COL4A2	PPI	0.5
CTLA4	CTLA4	PPI	0.625
MBL2	MBL2	PPI	0.75
PAK1	ESR1	PPI	0.625
ANPEP	ANPEP	PPI	0.875
PRKCD	STAT1	PPI	0.5
PTPRC	FYN	PPI	0.5
PRKCD	LMNB1	PPI	0.5
SMAD2	INSR	PPI	0.5
CRYAA	CS	PPI	0.5
SETDB1	RIF1	PPI	0.5
SMURF2	SF3A2	PPI	0.75
MATN2	FN1	PPI	0.625
FANCI	FANCD2	PPI	0.625
OGT	OGT	PPI	0.5
SFRP1	FZD6	PPI	0.5
PTMA	CCNB1	PPI	0.75
CDC7	MCM5	PPI	0.75
UTRN	UTRN	PPI	0.625
NCOA6	ESR1	PPI	0.5
TPR	SHC1	PPI	0.625
ATXN1	BTG3	PPI	0.5
SERPINE2	COL4A2	PPI	0.75
PRKCA	PLCB1	PPI	0.75
KNG1	THBS1	PPI	0.5
PRKCD	INSR	PPI	0.5
NCOA3	AR	PPI	0.5
CD36	LYN	PPI	0.5
REPS2	CDK5RAP2	PPI	0.5
DHX30	NCOR1	PPI	0.5
MCM10	CDKN2A	PPI	0.875
BAG2	HSPA1A	PPI	0.5
PTPRC	LCK	PPI	0.5
CDKN2A	CDK4	PPI	0.5
HDAC6	TUBA4A	PPI	0.5
HRAS	SOS1	PPI	0.5
LCK	CD3E	PPI	0.5
GCHFR	GCH1	PPI	0.625
PRMT2	ESR1	PPI	0.5
CDC45L	MCM7	PPI	0.5
NCOA6	GHR	PPI	0.5
CTH	CTH	PPI	0.875
GADD45B	ESR1	PPI	0.875
BAT1	BAT1	PPI	0.5
RELN	RELN	PPI	0.625
PRSS2	SLPI	PPI	0.5
ATXN1	UBAP2L	PPI	0.5
TIAM1	PRKCA	PPI	0.625
GADD45G	CDC2	PPI	1
SMAD2	EDD1	PPI	0.5
PRKDC	PRKDC	PPI	0.75
GRIA3	LYN	PPI	0.625
FLAD1	FLAD1	PPI	0.75
CDK5	NES	PPI	0.5
APOH	LPA	PPI	0.75
FYN	CDC2	PPI	0.5
SORBS2	SEMA6A	PPI	0.75
HMGA1	NFYA	PPI	0.625
CBX3	TRIM28	PPI	0.625
NEDD9	NEDD9	PPI	0.5
IL2RB	SOCS3	PPI	0.5
MMP12	F12	PPI	0.5
YWHAG	YWHAG	PPI	0.5
PYCRL	PYCRL	PPI	0.625
MRPL10	MRPL10	PPI	0.5
PPARBP	MED12	PPI	0.5
MAPK9	NFATC3	PPI	0.5
YWHAZ	PCTK1	PPI	0.625
SPTAN1	PRKCB1	PPI	0.5
LMAN1	F8	PPI	0.625
IL6ST	IL6ST	PPI	0.875
PCOLCE	COL3A1	PPI	0.5
NDFIP2	ITCH	PPI	0.5
FANCD2	NBN	PPI	0.5
IFITM1	IFITM1	PPI	0.625
TP53	IFI16	PPI	0.5
ANXA2	CTSB	PPI	0.75
ANXA2	GRB2	PPI	0.625
BIRC5	BIRC5	PPI	1
AGXT2L2	AGXT2L2	PPI	0.75
NOV	FN1	PPI	0.5
IFNGR1	IFNGR1	PPI	0.625
F5	F2	PPI	0.5
MCM5	MCM7	PPI	0.875
KPNA2	SLC2A2	PPI	0.5
NCOA2	CTNNB1	PPI	0.5
DNMT1	EZH2	PPI	0.75
INSR	KHDRBS1	PPI	0.625
CASP2	CASP2	PPI	0.5
C1QC	C1QA	PPI	0.5
MET	MET	PPI	0.5
CD74	HLA-DQB1	PPI	0.5
GPD1	PTN	PPI	0.5
RIPK2	TRAF5	PPI	0.75
RAN	MBP	PPI	0.625
NQO1	TP53	PPI	0.625
PPARA	PRKCD	PPI	0.5
NCOR1	PTMA	PPI	0.625
ASXL2	PRPF40A	PPI	0.5
CCR1	CCR1	PPI	0.625
GBP1	GBP1	PPI	0.875
CBL	YWHAB	PPI	0.5
PRKCA	RALBP1	PPI	0.5
NAP1L1	TP53	PPI	0.5
GADD45B	PCNA	PPI	0.75
F11	F11	PPI	0.75
PPIA	S100A8	PPI	0.5
FNTA	GBP1	PPI	0.625
NUP62	KPNB1	PPI	0.5
PRKCA	PLD1	PPI	0.625
VWF	VWF	PPI	0.75
PTPRC	LYN	PPI	0.75
CBL	LYN	PPI	0.5
RAB17	SMURF2	PPI	0.875
CFHR4	CFHR4	PPI	0.875
CFH	CRP	PPI	0.5
CDKN2A	GMNN	PPI	0.75
SPAG4	SPAG4	PPI	0.75
ADCY7	PRKCD	PPI	0.5
CCL19	CCL19	PPI	0.625
LCP2	VAV3	PPI	0.5
TUBB2C	TUBG1	PPI	0.5
SHCBP1	SHC1	PPI	0.5
CDK4	RFC4	PPI	0.5
APOA1	CETP	PPI	0.625
CCL5	CCL5	PPI	0.75
PECAM1	LCK	PPI	0.5
DDEF2	SH3KBP1	PPI	0.5
SMURF2	TGFBR1	PPI	0.5
MET	HGF	PPI	0.5
ZHX2	ZHX2	PPI	0.875
MASP2	MASP2	PPI	1
SMARCC1	CCNE1	PPI	0.625
MBL2	MASP2	PPI	0.75
DPT	DCN	PPI	0.875
NRCAM	NRCAM	PPI	0.625
CDKN2A	HSP90AB1	PPI	1
ITGB3BP	ESR1	PPI	0.75
STAT1	JUN	PPI	0.625
PPARGC1A	PPARBP	PPI	0.625
RBP1	HDAC2	PPI	0.5
HSPB1	TGFB1I1	PPI	0.5
THRSP	THRSP	PPI	1
MCM4	MCM6	PPI	0.75
PCNA	RFC4	PPI	0.75
UBE2I	DNMT3A	PPI	0.5
TTR	SETDB1	PPI	0.625
TPX2	TPX2	PPI	1
CSNK1D	DVL3	PPI	0.625
CDC5L	CDKN2A	PPI	0.5
SMARCA4	HSF1	PPI	0.5
YWHAZ	HSPA1B	PPI	0.75
TPM2	TPM2	PPI	0.75
DLAT	PDK4	PPI	0.75
NMT2	TP53	PPI	0.5
SPARC	PLAT	PPI	0.625
CBX5	SMARCA4	PPI	0.5
CBX1	CBX1	PPI	0.875
HSPB1	HSPB8	PPI	0.5
PDLIM5	TRIM39	PPI	0.5
ITK	GRB2	PPI	0.5
DOCK8	CDC42	PPI	0.5
YWHAZ	VIM	PPI	0.5
CTSB	SLPI	PPI	0.625
FBXO5	CDC20	PPI	0.5
ETS2	ETS2	PPI	0.875
BMPR2	BMPR2	PPI	0.5
SPARC	COL1A1	PPI	1
ANAPC7	CDH1	PPI	0.5
HRAS	CDC25C	PPI	0.5
PRKCD	IL6ST	PPI	0.625
ORC6L	MCM6	PPI	0.75
RRM2B	TP53	PPI	0.5
DCLRE1C	NBN	PPI	0.5
CDK6	CDKN2A	PPI	0.875
AKR7A3	AKR7A3	PPI	0.625
GZMA	LMNB1	PPI	0.5
FBLN1	VCAN	PPI	0.625
RNPS1	UBQLN4	PPI	0.625
IL8	IL8	PPI	0.875
SQSTM1	NBR1	PPI	0.625
MAFF	MAFF	PPI	0.625
HGS	EHMT2	PPI	0.875
PRKCD	ITGA6	PPI	0.625
TRIP13	STAMBPL1	PPI	0.5
CD8A	LCK	PPI	0.5
KLKB1	MST1	PPI	0.625
CSF2RB	STAT1	PPI	0.625
FOS	FOS	PPI	1
PTK2	STAT1	PPI	0.625
RIPK2	NGFR	PPI	0.5
CBX1	DNMT3A	PPI	0.75
ADRA1A	IL8RB	PPI	0.75
DBF4	MCM7	PPI	0.625
NME1	KSR1	PPI	0.5
TNC	FN1	PPI	0.75
TNFRSF11B	VWF	PPI	0.625
PRKCD	YWHAZ	PPI	0.625
AURKB	NUF2	PPI	0.625
MCM6	MCM6	PPI	1
AP1GBP1	SCAMP1	PPI	0.625
PDLIM5	PRKCB1	PPI	0.625
PRKCB1	ANXA2	PPI	0.625
YWHAZ	CSF2RB	PPI	0.625
NPM1	SHC1	PPI	0.5
CPNE2	PDCD6	PPI	0.5
DTNA	DMD	PPI	0.625
SGK	NEDD4L	PPI	0.625
HGFAC	HGF	PPI	0.875
TTF2	MATR3	PPI	0.625
COL4A2	COL4A2	PPI	0.875
SMARCA4	SMARCC1	PPI	0.875
YWHAG	LIMA1	PPI	0.5
AP2B1	BUB1	PPI	0.5
NR1I2	NR1I2	PPI	0.875
ESR1	TRIM28	PPI	0.75
CDC7	ORC6L	PPI	0.625
LASP1	TRIP13	PPI	0.75
S100A10	S100A10	PPI	0.875
PLK1	TUBG1	PPI	0.5
PRKCA	GJA1	PPI	0.5
PTK2	SHC1	PPI	0.625
CXCL10	VCAN	PPI	0.5
PSME3	KIAA1267	PPI	0.5
MATN2	COL1A1	PPI	0.625
SMAD2	RXRA	PPI	0.5
PPARBP	PPARA	PPI	0.5
MAPKAPK2	YWHAZ	PPI	0.5
CDC25C	CCNB1	PPI	0.75
CFI	CFH	PPI	0.625
CD2	PTPRC	PPI	0.5
NFYA	KPNB1	PPI	0.625
TBL1X	TBL1XR1	PPI	0.5
MEP1A	MEP1A	PPI	0.5
PLA1A	ANXA2	PPI	0.625
C4BPB	PROS1	PPI	0.625
C1R	C1R	PPI	0.875
KHDRBS1	ITK	PPI	0.5
ITCH	JUN	PPI	0.75
CKS2	CKS2	PPI	1
SYNCRIP	PABPC1	PPI	0.625
ILF3	FUS	PPI	0.625
MBP	HLA-DRA	PPI	0.5
LYN	MME	PPI	0.625
GPSM2	HRAS	PPI	0.5
GHR	GRB2	PPI	0.625
CYBB	CYBA	PPI	0.625
PRKCA	KIT	PPI	0.5
WWC1	CDC73	PPI	0.5
PFTK1	YWHAB	PPI	0.5
PLA2G4C	PLA2G4C	PPI	0.625
CDC2	FOXM1	PPI	0.875
CDC20	MAD2L1	PPI	1
ENAH	ABI2	PPI	0.625
ATPIF1	ATPIF1	PPI	0.5
SF3B4	TCERG1	PPI	0.75
CDK6	TGFBR1	PPI	0.5
HMGA1	IRF1	PPI	0.5
SPARC	SPARC	PPI	1
IGHM	HPR	PPI	0.5
GLUD1	GLUD1	PPI	0.875
UBE2I	JUN	PPI	0.5
CDC7	MCM7	PPI	0.75
F9	F2	PPI	0.625
JUN	NCOA2	PPI	0.625
CXCL1	CXCL1	PPI	0.5
MCM3	STAT1	PPI	0.625
IGHG1	IGHG1	PPI	0.5
GPX2	GPX2	PPI	0.75
P4HA2	P4HA2	PPI	0.875
GADD45A	CDC2	PPI	0.5
CLEC3B	PLG	PPI	0.5
SH3KBP1	SH3KBP1	PPI	0.5
DPT	TGFB1	PPI	0.5
LCK	STAT1	PPI	0.5
ITLN1	ITLN1	PPI	1
KRT19	HGS	PPI	0.75
TNFSF10	TNFRSF11B	PPI	0.625
PDE2A	PDE2A	PPI	0.625
MCM7	MCM7	PPI	0.875
IGF2	IGFBP4	PPI	0.5
PPARGC1A	RXRA	PPI	0.5
KIF15	MKI67	PPI	0.75
NCOA6	PRKDC	PPI	0.5
APOA4	APOA4	PPI	0.875
HLA-B	HLA-B	PPI	0.5
FBLN1	FBLN1	PPI	0.625
ITGB3BP	ITGB3BP	PPI	0.75
DCXR	DCXR	PPI	0.75
GRK5	ADRB2	PPI	0.5
PPP1R9A	PPP1R9A	PPI	0.75
SPAG9	SPAG9	PPI	0.5
CSNK1E	CSNK1E	PPI	0.5
CDC20	AURKA	PPI	1
TAF6	TAF6	PPI	0.625
LCAT	APOA1	PPI	0.625
MKI67	CBX3	PPI	0.625
PLK1	MCM2	PPI	0.5
HGD	HGD	PPI	0.875
GNA12	GNA12	PPI	0.5
BARD1	MDC1	PPI	0.5
OAT	OAT	PPI	0.75
SHC1	MME	PPI	0.75
TCERG1	SETDB1	PPI	0.75
UBE2C	UBE2C	PPI	1
CSNK1D	TP53	PPI	0.5
AGA	AGA	PPI	0.875
NCOA3	PSME3	PPI	0.625
EZH2	SMS	PPI	0.5
BLM	CHEK1	PPI	0.5
S100A12	S100A12	PPI	1
GADD45G	CCNB1	PPI	1
NDRG1	ILF3	PPI	0.625
KPNB1	KPNA2	PPI	0.875
MID1IP1	MID1	PPI	0.5
DDEF1	SH3KBP1	PPI	0.5
CDCA8	BIRC5	PPI	0.5
PPM1A	PRKCD	PPI	0.5
AKAP12	PRKCA	PPI	0.5
PRKCD	YWHAB	PPI	0.5
UBE2I	UBE2I	PPI	0.625
LYN	CTLA4	PPI	0.625
AR	IFI16	PPI	0.5
CCL4	IL8	PPI	0.5
LCK	ESR1	PPI	0.625
SHBG	SHBG	PPI	0.875
DUSP1	HSPA4	PPI	0.75
RAN	PTMA	PPI	0.625
MELK	LMNB1	PPI	0.625
PRKCA	ANXA2	PPI	0.75
SNRPD2	SNRPD1	PPI	0.5
PRKAR2A	PRKAR2A	PPI	0.5
TFPI2	PLG	PPI	0.5
KNG1	PLG	PPI	0.5
CDA	CDA	PPI	0.625
UBD	MAD2L1	PPI	1
GADD45G	PCNA	PPI	0.875
DIO1	DIO1	PPI	0.5
PAPSS1	PPP1R16A	PPI	0.75
CBX1	TRIM24	PPI	0.5
SMARCA2	KHDRBS1	PPI	0.5
RAMP3	VIPR1	PPI	0.5
GRB2	ADA	PPI	0.5
FBP1	FBP1	PPI	0.875
EDD1	KPNB1	PPI	0.75
MAP4K4	GBP3	PPI	0.5
CDC6	PCNA	PPI	0.75
UBQLN4	C1QTNF1	PPI	0.5
GHR	SHC1	PPI	0.75
MMP1	IGFBP3	PPI	0.5
RAB3IP	SSX2	PPI	0.5
MX1	MX1	PPI	0.625
MCM3	MCM7	PPI	0.875
AURKB	NDC80	PPI	0.625
KPNA2	TP53	PPI	0.75
LRG1	FN1	PPI	0.75
RACGAP1	TUBG1	PPI	0.875
INSR	ADRB2	PPI	0.625
NCOA3	JUN	PPI	0.625
PRPF40A	U2AF2	PPI	0.5
PLD1	RALA	PPI	0.875
C6	F2	PPI	0.5
ARID1B	SMARCA4	PPI	0.5
PLP2	PLP2	PPI	0.5
TAX1BP3	GLS2	PPI	0.5
HBA1	HBB	PPI	0.625
SPC25	NDC80	PPI	0.875
CTPS2	CTPS2	PPI	0.5
LYN	CDC2	PPI	0.75
UBE2I	TP53	PPI	0.5
SMURF2	ACBD3	PPI	0.625
ITGB2	ITGB2	PPI	0.5
NCOA3	ESR1	PPI	0.75
EDIL3	ITGAV	PPI	0.5
MED12	MED12	PPI	0.5
DTNA	SNTB2	PPI	0.5
RAD54B	RAD54B	PPI	0.625
RALGDS	RAP2A	PPI	0.5
ECM1	FBLN1	PPI	0.625
INSR	SOCS2	PPI	0.875
YWHAG	CHEK1	PPI	0.5
PRKCA	INSR	PPI	0.75
CDC6	MCM3	PPI	0.875
EDD1	KPNA2	PPI	0.875
NUP62	NUP62	PPI	0.5
POLR2K	POLR2K	PPI	0.625
CD24	LYN	PPI	0.75
SDSL	SDSL	PPI	0.5
KPNB1	RAN	PPI	0.75
ANXA2	CDC42	PPI	0.5
RRAS2	SMURF2	PPI	0.625
BUB1B	AP2B1	PPI	0.5
LGALS3BP	COL5A1	PPI	0.5
NAP1L1	NAP1L1	PPI	0.75
SMARCA4	CTNNB1	PPI	0.5
TMF1	AR	PPI	0.5
AZGP1	ITGAV	PPI	0.5
CA12	MRPL9	PPI	0.5
MAP3K5	TRAF5	PPI	0.5
BLM	FANCD2	PPI	0.5
PPARBP	RXRA	PPI	0.625
TAF6	TAF4	PPI	0.5
AURKA	TP53	PPI	0.75
PPARBP	AR	PPI	0.5
TBCB	TUBA4A	PPI	0.5
FN1	IGFBP5	PPI	0.75
RDBP	RDBP	PPI	0.875
AMBP	FN1	PPI	0.5
UPP2	VIM	PPI	0.625
SLC7A11	BAAT	PPI	0.5
PAFAH1B3	SETDB1	PPI	0.75
KPNA2	KPNA2	PPI	1
IRAK1	HRAS	PPI	0.5
COL4A1	COL4A2	PPI	0.875
TNFRSF11B	FN1	PPI	0.875
HGS	STAM	PPI	0.5
PDLIM5	PRKCE	PPI	0.5
HEATR1	XRN1	PPI	0.5
IFIT3	IFIT3	PPI	0.5
LGALS3BP	FN1	PPI	0.875
IRF5	IRF5	PPI	0.5
TPD52	TPD52	PPI	0.625
CDC2	STMN1	PPI	1
ACAA2	SCP2	PPI	0.75
CD2	LCK	PPI	0.5
PLAGL1	PLAGL1	PPI	0.625
CKAP4	PLAT	PPI	0.5
PCNA	CCNB1	PPI	0.875
TPX2	AURKA	PPI	1
SPRY2	CBL	PPI	0.5
CDKN3	CDC2	PPI	1
AKAP9	CSNK1D	PPI	0.5
PCNA	GADD45A	PPI	0.5
SOS1	GRB2	PPI	0.5
RBP4	ALB	PPI	0.5
CLU	LEPR	PPI	0.625
EIF3S6	GPAA1	PPI	0.625
SETDB1	BARD1	PPI	0.5
PTPN1	LTK	PPI	0.625
EFNB2	EFNB2	PPI	0.5
TEK	PTPRB	PPI	0.5
NR3C2	PIAS3	PPI	0.5
JUN	ETS2	PPI	0.75
HDAC2	SAP30	PPI	0.625
GRHL1	GRHL1	PPI	0.625
AR	JUN	PPI	0.5
AURKB	BIRC5	PPI	0.625
ITGA9	SPP1	PPI	0.625
CCL5	PIGR	PPI	0.5
MINK1	YWHAZ	PPI	0.5
LCK	ITK	PPI	0.5
MAD2L1	INSR	PPI	0.875
DDEF1	REPS2	PPI	0.875
MPDZ	CLDN1	PPI	0.5
PCNA	DNMT1	PPI	0.625
TCEA2	AKT1S1	PPI	0.5
DCN	COL1A1	PPI	0.875
IL8RB	CXCL6	PPI	0.5
PTMA	PCNA	PPI	0.625
SERPINI1	PLG	PPI	0.5
ITGA2	COL1A1	PPI	1
CBX3	CBX3	PPI	0.625
CKS1B	CKS1B	PPI	1
SMURF2	SMAD2	PPI	0.625
YWHAZ	HMGN1	PPI	0.5
FN1	COL4A1	PPI	0.875
CD47	ITGAV	PPI	0.5
SOX9	MED12	PPI	0.5
CDC2	PTCH1	PPI	0.5
TRIM24	TRIM24	PPI	0.5
KPNA2	ITK	PPI	0.625
ANPEP	TM4SF1	PPI	0.625
ILF2	PRKDC	PPI	0.5
ATXN1	YWHAZ	PPI	0.5
PTPRC	GRB2	PPI	0.625
CACYBP	S100A12	PPI	0.625
SMYD2	TP53	PPI	0.5
SMARCA4	STAT2	PPI	0.5
MIF	MIF	PPI	0.5
SMAD5	BCAT1	PPI	0.5
PRC1	RACGAP1	PPI	1
PTPN1	ESR1	PPI	0.625
LCN2	MMP9	PPI	0.625
TRIP13	C8orf32	PPI	0.75
FUS	FUS	PPI	0.75
GNMT	PLEKHF2	PPI	0.5
BARD1	BARD1	PPI	0.625
HMGA1	JUN	PPI	0.75
PPIA	BSG	PPI	0.5
GPLD1	GM2A	PPI	0.875
SETDB1	TRIM28	PPI	0.625
RAMP3	RAMP3	PPI	0.5
ESR1	PIAS3	PPI	0.5
RXRA	IGFBP3	PPI	0.5
SMAD2	HGS	PPI	0.625
KITLG	KIT	PPI	0.5
PRKAR2A	MAP2	PPI	0.5
LDLR	LDLR	PPI	0.75
ANTXR2	COL4A2	PPI	0.5
PSMB9	NCOA3	PPI	0.5
SEPT4	SEPT4	PPI	0.75
GNA14	CCR1	PPI	0.625
HMMR	TPX2	PPI	1
MCM4	MCM7	PPI	0.75
DBN1	NIPBL	PPI	0.625
TACC3	TTF2	PPI	0.625
AURKA	NME1	PPI	0.625
NR0B2	ESR1	PPI	0.5
CDC25C	CDC2	PPI	0.75
TRIB1	MAP2K1	PPI	0.5
GNAO1	GNAO1	PPI	1
MTHFD1	MTHFD1	PPI	0.75
GPHN	TUBA4A	PPI	0.5
DPP4	CXCR4	PPI	0.5
TP53	CDC25C	PPI	0.5
F2	F2RL1	PPI	0.5
CFLAR	RIPK2	PPI	0.5
LYN	EPOR	PPI	0.5
TP53	PAFAH1B3	PPI	0.625
VWF	COL1A1	PPI	0.75
CD74	HLA-DPA1	PPI	0.5
CD69	CD69	PPI	0.5
DVL3	DVL3	PPI	0.625
TESC	TESC	PPI	0.5
CEP55	PLK1	PPI	0.5
GADD45B	PPARA	PPI	0.5
KCNN2	KCNN2	PPI	1
RIPK2	CASP8	PPI	0.625
ESR1	DUT	PPI	0.625
KRAS	FNTA	PPI	0.5
PAK1	PAK1	PPI	0.625
KPNB1	IGFBP5	PPI	0.625
SMAD5	SNRPA	PPI	0.5
NCOA2	NCOA2	PPI	0.875
SELENBP1	TRIP13	PPI	0.5
PRKCB1	LMNB1	PPI	0.5
MARCKS	CTSB	PPI	0.625
SMAD5	HBG2	PPI	0.5
CYC1	CYC1	PPI	0.625
RXRA	PPARA	PPI	0.5
FEZ1	WWC1	PPI	0.625
HK2	UBQLN4	PPI	0.625
CDC45L	CDKN2A	PPI	0.5
ANXA2	S100A6	PPI	0.5
MT2A	SHBG	PPI	0.875
DMD	UTRN	PPI	0.5
PRKCA	LMNA	PPI	0.625
PRPF40A	SF1	PPI	0.5
CD8A	CD8A	PPI	0.5
VIM	SDCCAG3	PPI	0.5
SPEN	SOX9	PPI	0.625
UTP14A	TP53BP2	PPI	0.5
CASP8	HIP1	PPI	0.5
SMAD2	SQSTM1	PPI	0.625
RAN	RAN	PPI	0.75
CXCR4	PTK2	PPI	0.625
CDC25B	CDC2	PPI	0.625
MCM6	MCM2	PPI	0.875
HTRA2	BIRC3	PPI	0.5
PTBP2	PTBP2	PPI	0.625
LGALS3BP	CD14	PPI	0.625
C8A	C9	PPI	1
RB1CC1	PTK2	PPI	0.625
SPARC	COL1A2	PPI	1
FNTB	GBP1	PPI	0.5
UPF3B	UPF3B	PPI	0.75
SETDB1	DNMT3A	PPI	0.625
CHEK1	CUL4A	PPI	0.625
NR1I2	RXRA	PPI	0.625
CDC2	BIRC5	PPI	1
YWHAZ	KIF5B	PPI	0.625
TP53	RRM2	PPI	0.75
TNFSF10	TNFSF10	PPI	0.625
PRKCB1	PRKCB1	PPI	0.625
MCM10	CDC6	PPI	0.75
KLF6	TP53	PPI	0.5
YWHAZ	RALGPS2	PPI	0.625
PLK1	CCNB1	PPI	0.5
TFPI2	KLKB1	PPI	1
FN1	DCN	PPI	0.875
HSPA4	KPNA2	PPI	0.75
CTNNB1	CDK6	PPI	0.5
CENPJ	YWHAZ	PPI	0.625
PER3	PER1	PPI	0.5
IGHM	UBQLN4	PPI	0.625
THY1	THY1	PPI	0.75
SEPT8	SEPT8	PPI	0.625
PTMA	HSPA1A	PPI	0.5
IGF2	IGFBP1	PPI	0.625
RALGDS	RRAS2	PPI	0.5
DAB2	GRB2	PPI	0.5
KSR1	YWHAZ	PPI	0.625
B4GALT1	B4GALT1	PPI	0.875
FCN3	FCN3	PPI	1
CDC2	VIM	PPI	0.625
CXCL12	CXCR4	PPI	0.625
TFPI2	F11	PPI	0.75
NR3C2	TRIM24	PPI	0.5
KIF2C	KIF2C	PPI	0.875
LEF1	CTNNB1	PPI	0.5
CDC5L	MCM3	PPI	0.5
FN1	COL1A1	PPI	1
ARHGEF11	ARHGEF11	PPI	0.75
FNTA	RHOB	PPI	0.5
YWHAB	KIF23	PPI	0.5
RACGAP1	RACGAP1	PPI	1
MCM10	CDC45L	PPI	0.5
PLK1	CDC25C	PPI	0.5
BSG	BSG	PPI	0.75
TMPRSS6	COL1A1	PPI	0.875
ECGF1	ECGF1	PPI	0.5
LMNA	LMNA	PPI	0.875
HSPB8	BAG3	PPI	0.5
COMT	TRIP13	PPI	0.625
SULT1E1	BMPR2	PPI	0.5
CBL	CBL	PPI	0.5
THBS2	THBS2	PPI	0.75
EXOSC4	MPZL1	PPI	0.5
MCM2	MCM2	PPI	0.875
ENAH	GPHN	PPI	0.625
YWHAG	PCTK1	PPI	0.5
TP53	HDAC2	PPI	0.5
IL6ST	LIFR	PPI	0.875
MCM10	MCM3	PPI	0.75
TOPBP1	TOPBP1	PPI	0.5
FAS	FAS	PPI	0.625
PRKCB1	TOP2A	PPI	0.625
SLC16A10	RACGAP1	PPI	0.75
KLKB1	F12	PPI	0.625
MMP9	IL8	PPI	0.75
TCERG1	NPM1	PPI	0.625
CBX1	CBX5	PPI	0.5
SMC4	NCAPD2	PPI	0.75
FCN1	FCN1	PPI	0.625
SFN	MAP3K5	PPI	0.5
SMYD3	POLR2K	PPI	0.5
SUB1	SUB1	PPI	0.5
THBS1	HRG	PPI	0.625
DBF4	CDC7	PPI	0.5
MMP9	COL4A2	PPI	0.75
GATM	GATM	PPI	0.75
KLRD1	KLRD1	PPI	0.625
PLP2	SHBG	PPI	0.5
YWHAB	RALGPS2	PPI	0.5
GRN	SLPI	PPI	0.75
PRIM1	TP53	PPI	0.5
MMP9	MMP9	PPI	0.875
FCN2	MASP1	PPI	1
MED25	PPARBP	PPI	0.75
RAP2A	TGFBR1	PPI	0.5
JUN	TOP2A	PPI	0.75
YWHAG	CKAP2	PPI	0.5
SIP1	SNRPD2	PPI	0.5
TYMS	TYMS	PPI	1
CTSB	CTSB	PPI	0.75
PECAM1	PRPF40A	PPI	0.5
CDKN2A	GSPT1	PPI	0.5
TRIP13	TRIP13	PPI	0.875
NDC80	NUF2	PPI	1
SOCS7	GRB2	PPI	0.5
SMAD2	ESR1	PPI	0.625
IGF2	PLG	PPI	0.5
CLEC4G	CLEC4G	PPI	1
MAP3K5	MAP3K5	PPI	0.5
FN1	HGF	PPI	1
ENAH	FAT	PPI	0.875
GADD45G	PPARA	PPI	0.5
DAXX	DNMT1	PPI	0.5
COL4A1	SAA1	PPI	0.75
C1QB	C1QA	PPI	0.5
ABCG8	ABCG5	PPI	0.75
AURKA	NDC80	PPI	1
CFTR	CFTR	PPI	0.625
PRMT6	HMGA1	PPI	0.75
LGALS3BP	LGALS3	PPI	0.625
ID2	ID2	PPI	0.625
CCL21	UBQLN4	PPI	0.5
GPD2	ALDOA	PPI	0.625
MCM4	MCM4	PPI	0.75
NCOR1	TBL1X	PPI	0.5
NPHP3	NPHP3	PPI	0.5
TAP2	TAP1	PPI	0.625
WASF1	GRB2	PPI	0.5
SOX9	KPNB1	PPI	0.875
RRM1	RRM1	PPI	0.5
TP53	EGR1	PPI	0.75
ORC6L	MCM2	PPI	0.75
YWHAZ	PRKCA	PPI	0.625
RALBP1	REPS2	PPI	0.75
ACY3	ACY3	PPI	0.625
PAH	PAH	PPI	0.5
NOV	IGF2	PPI	0.5
DDX39	BAT1	PPI	0.5
ENO1	CXCL2	PPI	0.5
RAB4A	TP53	PPI	0.5
SQSTM1	GABARAPL1	PPI	0.625
COL1A2	SHBG	PPI	0.875
FEZ1	FEZ1	PPI	0.75
TAPBP	HLA-A	PPI	0.5
HGF	LCN2	PPI	0.75
YWHAB	KIF5B	PPI	0.5
PPIA	PPIA	PPI	0.5
IRAK1	RIPK2	PPI	0.5
LCP2	LYN	PPI	0.5
EBF1	EBF1	PPI	0.5
RAN	AR	PPI	0.625
MINA	MINA	PPI	0.5
CFL1	YWHAZ	PPI	0.5
CCR1	CCL2	PPI	0.5
DAO	ABP1	PPI	0.75
ABHD5	ADFP	PPI	0.5
CBL	DDEF1	PPI	0.5
CDK5	CDK5	PPI	0.625
IGFBP5	F2	PPI	0.5
HDAC2	CDC20	PPI	0.75
KPNB1	CSNK1A1	PPI	0.5
PPFIBP1	PPFIBP1	PPI	0.625
TRIM31	TRIM31	PPI	0.5
HSPD1	ALDH2	PPI	0.625
RIT1	SMAD2	PPI	0.5
KRT19	TUBG1	PPI	0.75
IL8RB	IL8RB	PPI	0.75
BUB3	BUB1B	PPI	0.625
BCL2A1	BAX	PPI	0.5
CD8A	PTPRC	PPI	0.5
RFX5	HDAC2	PPI	0.625
PTCH1	CCNB1	PPI	0.5
ATR	NBN	PPI	0.5
TRIM28	TRIM28	PPI	0.75
LMNB1	LMNA	PPI	0.5
TRIM11	TRIM11	PPI	0.5
TXNRD1	PPP1R16A	PPI	0.625
TEK	TEK	PPI	0.5
CDK4	MCM2	PPI	0.5
MELK	MBP	PPI	0.75
BMPER	BMP2	PPI	0.625
PTGS2	PTGS2	PPI	1
SMARCE1	ESR1	PPI	0.5
SMURF2	TFPI2	PPI	0.875
KIT	PRKCB1	PPI	0.5
TCEA2	WDR47	PPI	0.5
NR1H4	RXRA	PPI	0.625
MEP1A	FN1	PPI	0.5
AURKA	TACC3	PPI	0.75
ANGPT1	ANGPT1	PPI	0.625
CDKN2C	CDK4	PPI	0.5
BUB3	BUB1	PPI	0.625
CCR1	CCL5	PPI	0.5
KPNA2	PTMA	PPI	0.75
MAFB	MAFB	PPI	0.5
DDX3Y	SHBG	PPI	0.875
CDKN2A	CDKN2A	PPI	1
ALAD	ALAD	PPI	0.75
MMP2	COL1A1	PPI	0.5
SORBS2	PKM2	PPI	0.625
MDC1	H2AFX	PPI	0.625
MCM8	MCM4	PPI	0.625
MCM5	STAT1	PPI	0.625
CDKN3	CDKN3	PPI	1
YWHAG	GTPBP4	PPI	0.5
HLA-DRB1	HLA-DMA	PPI	0.625
PNMA1	UBQLN4	PPI	0.75
BCOR	CPNE2	PPI	0.5
CD36	YES1	PPI	0.5
NCOR1	NCOR1	PPI	0.625
C7	CLU	PPI	0.75
CIDEB	CIDEB	PPI	0.875
GADD45G	C21orf6	PPI	0.5
MED28	GRB2	PPI	0.5
CDKN2A	AHNAK	PPI	0.75
LCP2	PTPRC	PPI	0.625
STAT1	CXCR4	PPI	0.625
MATN2	COL4A5	PPI	0.5
C8B	C5	PPI	0.5
WASF1	IL8	PPI	0.5
CBL	LTK	PPI	0.5
GPAA1	PIGU	PPI	0.75
DAXX	DAXX	PPI	0.5
RDH5	RDH5	PPI	0.75
RRM2B	RRM2	PPI	0.625
FN1	MMP9	PPI	0.875
PRKCD	ADRB2	PPI	0.5
MASP2	FCN2	PPI	1
STK39	SLC12A2	PPI	0.875
PLG	ANXA2	PPI	0.5
CTSB	RGS2	PPI	0.625
PRKCD	MBP	PPI	0.5
UTP14A	GADD45G	PPI	0.75
MAPK1	ESR1	PPI	0.5
IGFBP3	COL1A1	PPI	0.875
GNAO1	GNAI1	PPI	0.5
MBL2	PTPRC	PPI	0.625
CDC25C	CCNA2	PPI	0.75
SMURF2	SMAD5	PPI	0.5
FBLIM1	PLEKHC1	PPI	0.5
UCK2	UCK2	PPI	0.625
NPR2	NPR2	PPI	0.5
CRYAA	CRYAA	PPI	0.875
TP53	HSPB1	PPI	0.75
NR5A2	ALB	PPI	0.625
SYT9	SYT9	PPI	0.75
SERPING1	MASP1	PPI	0.5
NR1I3	PPARBP	PPI	0.625
ACADM	ACADM	PPI	0.5
MCM7	MCM10	PPI	0.75
SPARC	FN1	PPI	1
NCOA2	KIF5B	PPI	0.625
NBN	H2AFX	PPI	0.625
BIRC5	CDK4	PPI	0.5
JUNB	JUNB	PPI	0.625
C10orf18	C10orf18	PPI	0.5
DGKZ	HRAS	PPI	0.5
SMURF2	RUNX3	PPI	0.5
GGA1	GGA1	PPI	0.5
ANGPTL1	ANGPTL1	PPI	0.875
NR1I3	RXRA	PPI	0.625
PABPC1	PABPC1	PPI	0.75
INSR	INSR	PPI	0.875
ASCL1	ASCL1	PPI	1
ALCAM	ALCAM	PPI	0.5
YWHAZ	CDC25C	PPI	0.625
IL18R1	IL1RAP	PPI	0.5
CNDP1	CNDP1	PPI	1
ADAMTS1	VCAN	PPI	0.625
HIST2H2BE	PTMA	PPI	0.5
PRKCA	ADD3	PPI	0.5
BCL2L10	BAX	PPI	0.625
RIPK2	CASP1	PPI	0.5
NTS	CPE	PPI	0.5
KIF2C	CENPH	PPI	0.625
ADAM9	ITGA6	PPI	0.875
SAP30	NCOR1	PPI	0.5
ANG	ATP6AP1	PPI	0.75
CDC42EP5	CDC42	PPI	0.5
CORO1A	THBS1	PPI	0.5
H2AFX	H2AFX	PPI	1
TOLLIP	IL1RAP	PPI	0.5
DYRK2	HIST2H2BE	PPI	0.5
TRPV2	TRPV2	PPI	0.5
CCNE1	CDC2	PPI	0.625
CCAR1	SFN	PPI	0.625
GGA3	GGA3	PPI	0.625
CSNK1D	CDK5	PPI	0.5
PTPRC	INSR	PPI	0.75
IGFALS	PDCD6	PPI	0.5
NEK2	NEK2	PPI	1
NCAPH	CAPG	PPI	0.5
FEN1	PCNA	PPI	0.625
PRKCA	CD163	PPI	0.75
DVL3	DAB2	PPI	0.5
CPSF1	CPSF1	PPI	0.625
ESR1	MLL2	PPI	0.625
YWHAG	TIAM1	PPI	0.5
NOTCH3	MAML2	PPI	0.5
YWHAZ	ENO1	PPI	0.625
NDC80	ZWINT	PPI	1
CDC5L	MCM5	PPI	0.5
XPO5	RAN	PPI	0.5
CKS2	CKS1B	PPI	1
CDK6	MCM2	PPI	0.75
SMC2	SMC4	PPI	0.75
RALGDS	KRAS	PPI	0.5
JUN	FOS	PPI	0.75
CDA	KPNA2	PPI	0.625
PLXNA1	PLXNA1	PPI	0.75
IRAK1	JUN	PPI	0.5
MAPK1	MAPK1	PPI	0.5
FBN1	DCN	PPI	0.5
TAP1	ESR1	PPI	0.75
TNFRSF10D	TNFRSF10D	PPI	0.75
MCM3	MCM2	PPI	0.875
FBLN5	LPA	PPI	0.625
CHD9	ESR1	PPI	0.5
HDAC2	DNMT1	PPI	0.625
GNE	RIF1	PPI	0.625
ANXA3	TP53	PPI	0.5
PRKCA	SPP1	PPI	0.75
CLEC4M	ICAM3	PPI	0.5
NR1H4	ESR1	PPI	0.625
ZNF451	PRPF40A	PPI	0.5
GADD45G	RAN	PPI	0.75
PIK3R1	PIK3R1	PPI	0.5
MNDA	CDC2	PPI	0.5
F8	PROS1	PPI	0.625
CYB5A	SCD	PPI	0.5
LUM	COL1A2	PPI	0.5
THBS1	COL3A1	PPI	0.625
PABPC1	GSPT1	PPI	0.5
COIL	KALRN	PPI	0.5
SPHK1	LYN	PPI	0.5
TUBA1B	PIK3R1	PPI	0.5
NIN	AURKA	PPI	0.75
DPP4	DPP4	PPI	0.625
TERF1	TERF1	PPI	0.625
VCAN	VCAN	PPI	0.875
TP53INP1	TP53	PPI	0.5
CENPJ	TUBG1	PPI	0.5
UTP14A	CEP70	PPI	0.5
SERPINB9	SETDB1	PPI	0.5
CCL5	GRB2	PPI	0.5
NCOA3	NCOA3	PPI	0.75
C7	C5	PPI	0.5
PTK2	TP53	PPI	0.75
MAPKAPK2	SHC1	PPI	0.5
MMP12	PLAUR	PPI	0.5
NAB1	EGR1	PPI	0.5
HOMER1	HOMER1	PPI	1
MPDZ	MPDZ	PPI	0.625
PEA15	PLD1	PPI	0.625
PTTG1	CDC20	PPI	1
GSTZ1	GSTZ1	PPI	1
CLK2	CLK2	PPI	0.5
EIF5	EIF1AY	PPI	0.625
EIF4G3	PABPC1	PPI	0.5
CDC2	HMGA1	PPI	1
ATR	RHEB	PPI	0.75
KLF6	EHMT2	PPI	0.625
CD74	HLA-DQA1	PPI	0.5
PTGS1	PTGS1	PPI	0.625
DMD	DMD	PPI	0.625
FCGR2B	CRP	PPI	0.625
GGH	GGH	PPI	0.75
ARHGEF11	MAP1B	PPI	0.625
CCL21	VCAN	PPI	0.5
GPLD1	APOA4	PPI	0.75
SOCS3	LEPR	PPI	0.625
IL1RAP	PRPF40A	PPI	0.75
MCM7	MCM2	PPI	0.875
F9	F8	PPI	0.75
NCOA3	NR1I2	PPI	0.75
CFP	CFB	PPI	0.75
TIAM1	NME1	PPI	0.5
PTK2	FYN	PPI	0.5
CHN2	TGFBR1	PPI	0.5
TK1	SETDB1	PPI	0.75
TCERG1	BARD1	PPI	0.5
LGALS4	RRAS2	PPI	0.625
CBX1	CBX3	PPI	0.625
FNTA	PTP4A3	PPI	0.5
IGFALS	IGFBP5	PPI	0.75
C2	MASP1	PPI	0.625
IRAK1	IRAK1	PPI	0.5
FNBP4	PRPF40A	PPI	0.625
SIGIRR	SIGIRR	PPI	0.625
TAX1BP3	GLS	PPI	0.5
TAF6	SH3KBP1	PPI	0.5
CBFA2T2	NCOR1	PPI	0.625
CHTF18	RFC4	PPI	0.5
ALDOA	ALDOA	PPI	0.875
TRIM24	TRIM28	PPI	0.5
MINK1	YWHAB	PPI	0.5
RRAGC	RRAGC	PPI	0.5
GCH1	GCH1	PPI	0.625
TAP2	HLA-C	PPI	0.625
S100A8	S100A8	PPI	0.875
IL6ST	ERBB3	PPI	0.5
DBF4	MCM3	PPI	0.625
SLC16A1	BSG	PPI	0.625
ATF3	TP53	PPI	0.75
TIAM1	PRKCD	PPI	0.5
KIF5B	SNAP25	PPI	0.5
RBP1	SAP30	PPI	0.625
IFNAR1	PTPRC	PPI	0.75
DACH1	UBE2I	PPI	0.625
PLA2G2A	DCN	PPI	0.75
YWHAB	OSBPL3	PPI	0.625
BUB1	CDC20	PPI	1
CDC2	NES	PPI	0.625
MCM4	MCM2	PPI	0.75
YWHAZ	TP53	PPI	0.625
CRLS1	MCM6	PPI	0.5
RXRA	FUS	PPI	0.5
MED25	MED6	PPI	0.5
RASGRP1	HRAS	PPI	0.5
TP53	ESR1	PPI	0.75
FGF13	FGF13	PPI	0.75
PBK	TP53	PPI	0.75
APOA1	APOA1	PPI	0.625
PPP2R1B	HSPD1	PPI	0.5
FEZ1	NBR1	PPI	0.5
TRIP13	C11orf54	PPI	0.625
CD47	THBS1	PPI	0.625
CXCL10	CXCL10	PPI	0.625
MAP4K4	RAP2A	PPI	0.5
DBH	DBH	PPI	0.875
PRMT2	PRMT2	PPI	0.5
ATF6	ATF6	PPI	0.5
ALDH3A1	ALDH3A1	PPI	0.5
MMP2	COL6A3	PPI	0.5
CBFA2T2	C8orf32	PPI	0.625
MAPK1	FOS	PPI	0.5
SERPINE1	SERPINE1	PPI	1
TMPRSS2	TMPRSS2	PPI	0.5
LCN2	LCN2	PPI	0.75
ABCC9	KCNJ8	PPI	0.75
TNPO1	RAN	PPI	0.5
MAPK9	SF3B4	PPI	0.5
CDCA8	AURKB	PPI	0.5
BUB1B	CENPE	PPI	0.875
KCNK1	KCNK1	PPI	0.75
FNTA	HRAS	PPI	0.625
RGS2	PRKCA	PPI	0.625
LIMS1	EHMT2	PPI	0.5
SOCS3	SOCS2	PPI	0.75
MLLT3	MLLT3	PPI	0.5
SETDB1	ZFP64	PPI	0.5
KHDRBS1	LCK	PPI	0.5
MDK	UBQLN4	PPI	0.875
PLD1	CDC42	PPI	0.5
HLA-A	HLA-A	PPI	0.625
SNRPN	TP53	PPI	0.5
IGF2	IGFBP5	PPI	0.75
MAP2	MAP2	PPI	0.875
FEZ1	HEATR2	PPI	0.75
MCM5	MCM2	PPI	0.875
HSPA4	NR3C2	PPI	0.75
ORC6L	CDC6	PPI	0.75
THY1	LCK	PPI	0.5
PPP2R1B	CFTR	PPI	0.5
TAF1A	TP53	PPI	0.625
PPARBP	CRSP2	PPI	0.5
ADSSL1	ADSSL1	PPI	0.75
CTSS	SLPI	PPI	0.75
MCM4	MCM3	PPI	0.75
LPA	FN1	PPI	1
TIAM1	HRAS	PPI	0.5
PRPF40A	UBQLN4	PPI	0.625
DCN	COL1A2	PPI	0.875
HLA-DRA	HLA-DMA	PPI	0.5
TAPBP	HLA-C	PPI	0.5
CDC20	BUB1B	PPI	1
NCAPG	HSF2	PPI	0.5
GNAO1	RGS10	PPI	0.75
ITGB3BP	CCNA2	PPI	0.75
CDK5	MAP2K1	PPI	0.625
PRKDC	JUN	PPI	0.625
FYN	CDK5	PPI	0.5
ASS1	ASS1	PPI	0.75
SMARCA4	SMARCE1	PPI	0.5
NR1I3	PPARGC1A	PPI	0.625
TNC	PTPRB	PPI	0.625
HRAS	MAP2K1	PPI	0.5
CEP55	CDC2	PPI	0.875
IGFBP3	F2	PPI	0.5
CDC37L1	CDC37L1	PPI	0.875
HBB	HBB	PPI	0.75
PKM2	SHBG	PPI	0.75
C1QC	C1QB	PPI	0.5
COIL	TGS1	PPI	0.5
FCGR1A	FCGR1A	PPI	0.5
CADM1	CADM1	PPI	0.625
PRKCA	MBP	PPI	0.5
MCM3	MCM6	PPI	0.875
CDC2	RAB4A	PPI	0.5
PRUNE	PRUNE	PPI	0.5
SAP130	ARID4B	PPI	0.5
CPM	HBA2	PPI	0.5
LCP2	GRB2	PPI	0.5
PTMA	CDK4	PPI	0.5
FN1	C1QA	PPI	0.5
ESR1	CTNNB1	PPI	0.5
FASN	FASN	PPI	0.5
NDRG1	MAOA	PPI	0.5
MMP2	PZP	PPI	0.5
CDKN2C	CDK6	PPI	0.875
GRB2	NPM1	PPI	0.5
PDGFRA	PDGFRA	PPI	0.625
ATR	TP53	PPI	0.5
FN1	COL4A2	PPI	0.875
KPNB1	CSE1L	PPI	0.75
SKAP2	SKAP2	PPI	0.625
GADD45B	CCNB1	PPI	0.875
CDC2	CDC2	PPI	1
PON1	APOA1	PPI	0.625
RPL5	RPL5	PPI	0.5
TNFRSF10A	TNFRSF10D	PPI	0.5
DNMT1	EED	PPI	0.625
SORBS2	PAK1	PPI	0.5
RACGAP1	TUBA4A	PPI	0.5
BRD7	HIST2H2BE	PPI	0.5
FZD7	UBQLN4	PPI	0.5
PBX1	MYH10	PPI	0.5
SMARCA4	ESR1	PPI	1
ITCH	ITCH	PPI	0.875
HGS	MAP3K7	PPI	0.5
SYNE1	LMNA	PPI	0.5
ESR1	NR2F1	PPI	0.5
PDIA5	UBQLN4	PPI	0.75
GRB2	SH3KBP1	PPI	0.5
AATF	CHEK1	PPI	0.5
GLUD2	GLUD2	PPI	0.875
F7	F7	PPI	0.625
REPS2	GRB2	PPI	0.625
HSD17B14	HSD17B14	PPI	0.5
HDAC2	PTMA	PPI	0.625
ASPA	ASPA	PPI	0.875
STMN1	UBQLN4	PPI	0.875
CASP8	VIM	PPI	0.5
PLG	PLG	PPI	0.5
TRIM24	ESR1	PPI	0.5
GRB2	GRB2	PPI	0.625
PTN	APOBEC3G	PPI	0.5
GPC3	IGF2	PPI	1
PRUNE	NME1	PPI	0.5
SPTAN1	SPTBN1	PPI	0.5
KHDRBS1	PLCG1	PPI	0.5
AZGP1	AZGP1	PPI	0.875
PLAT	SERPINE1	PPI	0.625
BIRC3	GSPT1	PPI	0.5
YWHAZ	HSPA1A	PPI	0.5
RPS6KA3	ESR1	PPI	0.625
DNAJB9	TCEA2	PPI	0.5
PCNA	RFC3	PPI	0.625
SPP1	UBQLN4	PPI	0.875
BCHE	BCHE	PPI	1
KRT19	FANCG	PPI	0.5
CETP	CETP	PPI	1
PLK1	BUB1	PPI	0.5
TPD52L1	YWHAZ	PPI	0.75
CD36	COL1A1	PPI	0.625
ESR1	JUNB	PPI	0.625
IL8RB	CXCL2	PPI	0.75
TCF3	CTNNB1	PPI	0.5
S100A10	SETDB1	PPI	0.75
ACLY	ACLY	PPI	0.875
SULT2A1	SULT2A1	PPI	0.875
MLLT10	MLLT10	PPI	0.625
DDEF1	PTK2	PPI	0.875
PAIP2B	PABPC1	PPI	0.75
MAP3K5	TPD52L1	PPI	0.5
CACYBP	S100P	PPI	0.5
ARHGEF3	RHOB	PPI	0.5
YWHAG	DYNC1H1	PPI	0.5
ATR	MSH2	PPI	0.625
ETS2	SMARCA4	PPI	0.875
SYNC1	DTNA	PPI	0.5
PRKCA	PRKCA	PPI	0.75
SERPING1	C1R	PPI	0.5
TAPBP	TAP1	PPI	0.5
VIM	KIF15	PPI	0.5
SERPINE2	F2	PPI	0.5
DNMT3A	EZH2	PPI	0.75
FEZ1	OLFML3	PPI	0.5
CDC2	FEN1	PPI	0.75
SGK3	ITCH	PPI	0.5
HSF1	HSF1	PPI	0.5
PER1	CSNK1D	PPI	0.625
TFRC	TFRC	PPI	0.875
CRLS1	MCM7	PPI	0.5
TMSB10	TMOD1	PPI	0.5
TIAM1	TIAM1	PPI	0.75
UBQLN4	UBQLN4	PPI	0.875
SMARCA4	CCNE1	PPI	0.625
PTK2	SOCS2	PPI	0.875
NEK2	NDC80	PPI	1
SPTAN1	TES	PPI	0.75
SOS1	BIN1	PPI	0.5
ASPM	PLK1	PPI	0.5
SERPINE1	PLG	PPI	0.5
F8	F2	PPI	0.5
CCL2	CCL2	PPI	0.75
TM4SF1	TUBA4A	PPI	0.5
HOMER2	DBN1	PPI	0.625
PCNA	MSH2	PPI	0.75
LCK	PTK2	PPI	0.5
PRKCD	PLCB1	PPI	0.5
RXRA	UBQLN4	PPI	0.625
TLR3	TLR3	PPI	0.625
GADD45G	PTN	PPI	0.5
JUN	JUN	PPI	0.75
PKM2	PKM2	PPI	0.75
NDRG1	PABPC1	PPI	0.625
CTSC	CTSC	PPI	0.875
TAF15	SF1	PPI	0.5
ABI2	SH3KBP1	PPI	0.5
SERPINE1	UBQLN4	PPI	0.875
CPSF6	UBQLN4	PPI	0.75
F2	F2	PPI	0.625
PRKCA	SHC1	PPI	0.5
PTMA	CCNA2	PPI	0.75
BIN1	DDEF2	PPI	0.5
YWHAB	YWHAB	PPI	0.625
RECQL	RECQL	PPI	0.625
ALS2CR8	CDKN2A	PPI	0.5
YWHAG	PRKCD	PPI	0.5
CDC2	FANCG	PPI	0.625
C1S	SERPING1	PPI	0.5
SYNJ2	SYNJ2	PPI	0.875
CHEK1	CDC25C	PPI	0.75
HRAS	INSR	PPI	0.5
E2F3	CCNA2	PPI	0.75
RALGDS	HRAS	PPI	0.5
HIST2H2BE	GADD45A	PPI	0.5
PRKCD	DAB2	PPI	0.625
TRRAP	ESR1	PPI	0.75
CDC2	TK1	PPI	0.875
JUN	EGR1	PPI	0.75
KCNJ8	KCNJ8	PPI	0.75
CDC2	NPM1	PPI	0.75
HBB	HBA2	PPI	0.625
THBS1	CD36	PPI	0.5
HGS	PIK3R1	PPI	0.5
NCOA2	ESR1	PPI	0.875
TRIM6	TRIM6	PPI	0.75
MCM3	PLK1	PPI	0.5
TKT	TKT	PPI	1
SLC16A3	BSG	PPI	0.5
CDH1	CDH1	PPI	0.625
GNMT	GNMT	PPI	0.875
ALDH2	ALDH2	PPI	0.75
CBL	YWHAZ	PPI	0.5
ATF3	NUF2	PPI	1
PPP2R1B	MCM3	PPI	0.625
RAN	SMAD2	PPI	0.5
PAG1	LYN	PPI	0.5
STIP1	HSPA1A	PPI	0.5
DNMT3L	DNMT3A	PPI	0.5
TAP1	HLA-F	PPI	0.625
NFATC3	FOS	PPI	0.625
TES	ENAH	PPI	0.625
STXBP6	SNAP25	PPI	0.625
ATP1A1	EZH2	PPI	0.5
PAK1	COL1A1	PPI	0.625
KIF23	RACGAP1	PPI	0.75
PRPF40A	ENAH	PPI	0.625
SEPT8	SEPT4	PPI	0.5
CTSA	CTSA	PPI	0.875
AURKA	AURKA	PPI	1
ITGA6	GRB2	PPI	0.625
CDC6	CDKN2A	PPI	0.875
RALA	PPP2R1B	PPI	0.625
KIT	KIT	PPI	0.5
IGF1	IGFBP5	PPI	0.625
PDCD6	PDCD6	PPI	0.5
IGF1	IGFBP1	PPI	0.5
PSPH	PSPH	PPI	1
INHBE	INHBE	PPI	0.625
PRKDC	PRKCD	PPI	0.5
HBG2	HBB	PPI	0.5
SHBG	SORD	PPI	0.625
JUN	ESR1	PPI	0.75
SLC4A7	SLC4A4	PPI	0.5
SSB	SSB	PPI	0.5
RGS5	GNAO1	PPI	1
HAVCR2	HAVCR2	PPI	0.5
SERPING1	MASP2	PPI	0.5
MDK	MDK	PPI	1
OAT	UBQLN4	PPI	0.625
ALB	F7	PPI	0.5
ESR1	RXRA	PPI	0.625
ZMYND8	PRKCB1	PPI	0.5
DPP4	PTPRC	PPI	0.625
MT1G	SHBG	PPI	0.875
HIP1	HIP1	PPI	0.5
C1S	C1R	PPI	0.875
NT5E	FN1	PPI	0.5
AMBP	ALB	PPI	0.5
MLLT3	MCM6	PPI	0.5
CDC6	MCM2	PPI	0.875
YWHAB	HSPA1B	PPI	0.5
RAP1GAP	RAP1GAP	PPI	0.5
PDGFRA	STAT1	PPI	0.5
CENTG2	CENTG2	PPI	0.5
MUT	MUT	PPI	0.875
CDC2	BUB1	PPI	1
HSPB1	DAXX	PPI	0.5
NCOA2	DDX17	PPI	0.5
ZWILCH	KNTC1	PPI	0.625
NDRG1	PKM2	PPI	0.625
PHLDA1	HSPA4	PPI	0.625
BCL2L10	BCL2L10	PPI	1
CDC7	CDKN2A	PPI	0.75
PTK2	LYN	PPI	0.625
MMP2	IGFBP3	PPI	0.5
SPARC	COL3A1	PPI	0.75
CAPN3	CAPN3	PPI	1
LCP1	LCP1	PPI	0.625
GCHFR	GCHFR	PPI	0.875
NCOR1	ESR1	PPI	0.625
STAT1	STAT1	PPI	0.75
INSR	IGF2	PPI	0.875
IL8RB	GNA14	PPI	0.75
PRKD2	PRKD2	PPI	0.625
DVL3	PPM1A	PPI	0.5
SYT9	SYNCRIP	PPI	0.625
F8	VWF	PPI	0.5
PRKDC	TP53	PPI	0.5
KPNB1	IGFBP3	PPI	0.75
SHC1	RET	PPI	0.5
IFT57	IFT57	PPI	0.625
KCNMA1	KCNMA1	PPI	0.75
MCM10	CDC7	PPI	0.625
SNAP25	HGS	PPI	0.5
PPM1A	SMAD2	PPI	0.5
EPOR	EPOR	PPI	0.625
TRAF5	TRAF5	PPI	1
HRAS	AGTR1	PPI	0.625
BACE2	BACE2	PPI	0.5
TGFBR1	FNTA	PPI	0.5
CD1D	PTPRC	PPI	0.625
ABAT	ABAT	PPI	0.875
NDRG1	HSD17B4	PPI	0.5
ITGA2	MMP1	PPI	0.5
LOX	DPT	PPI	0.875
MATN2	COL4A1	PPI	0.5
NR3C2	AR	PPI	0.625
IGFALS	IGFBP3	PPI	0.875
MCM10	MCM2	PPI	0.75
CASP1	CASP1	PPI	0.625
NME1	NME1	PPI	0.625
KPNA2	CSNK1A1	PPI	0.5
GNAI1	GNAI1	PPI	0.5
MMP9	COL1A2	PPI	0.875
STK17B	STK17B	PPI	0.5
ERBB3	ERBB3	PPI	0.5
THRAP4	ESR1	PPI	0.875
[truncated: 379 more rows]
