# Supplementary material for: A Comprehensive Analysis of the Dynamic Biological Networks in HCV Induced Hepatocarcinogenesis
Source: PLoS One. 2011 Apr 19;6(4):e18516. doi: 10.1371/journal.pone.0018516 (PMC3079719; doi:10.1371/journal.pone.0018516)
Supplement: Data S2 — Progression-related sub networks in the progression of HCV induced hepatocarcinogenesis. (XLS) [file pone.0018516.s002.xls]

## Sheet: Initially from Hepatitis C 
Protein1	Protein2	Iteraction type			#PPI is protein-protein interaction,TRI is transcriptional regulatory interaction.
HSD17B14	HSD17B14	PPI			#When interaction is TRI, Protein1 is transcription factor, Protein2 is target gene.
CRP	CRP	PPI
PLA2G2A	PLA2G2A	PPI
SERPINE1	SERPINE1	PPI
CHI3L1	CHI3L1	PPI
THBS1	COL1A1	PPI
CD74	HLA-DQB1	PPI
CCL5	PIGR	PPI
CNDP1	CNDP1	PPI
S100A12	S100A12	PPI
STAT1	STAT1	PPI
ITCH	ITCH	PPI
LEPR	LEPR	PPI
HLA-B	HLA-B	PPI
CD74	CD74	PPI
S100A8	S100A8	PPI
SOD2	SOD2	PPI
CCL19	CCL19	PPI
IGHD	IGHD	PPI
AQP1	AQP1	PPI
SLC1A2	SLC1A2	PPI
TFRC	TFRC	PPI
STAT1	STAT1	TRI
CXCL10	CXCL10	PPI
CASP1	CASP1	PPI
LEF1	LEF1	TRI
GZMA	GZMA	PPI
CD74	HLA-DPA1	PPI
PDGFA	PDGFA	PPI
LGALS3BP	LGALS3BP	PPI
CD74	HLA-DQA1	PPI
IL8	IL8	PPI
PTPRC	PTPRC	PPI
PSPH	PSPH	PPI
ASCL1	ASCL1	PPI
F11	F11	PPI
S100P	S100P	PPI
CTSC	CTSC	PPI
HGF	HGF	PPI
KCNN2	KCNN2	PPI
MAP2	MAP2	PPI
CCL5	CCL5	PPI

## Sheet: Initially from Cirrhosis
Protein1	Protein2	Iteraction type			#PPI is protein-protein interaction,TRI is transcriptional regulatory interaction.
PLA2G2A	VCAN	PPI			#When interaction is TRI, Protein1 is transcription factor, Protein2 is target gene.
BCHE	BCHE	PPI
PDK4	PDK4	PPI
VWF	VWF	PPI
ESR1	ESR1	PPI
STAT1	CXCR4	PPI
COL4A1	COL4A1	PPI
GNMT	GNMT	PPI
MID1	MID1	PPI
CFTR	CFTR	PPI
COL4A1	COL4A2	PPI
TRAF5	TRAF5	PPI
HGD	HGD	PPI
PDGFRA	PDGFRA	PPI
COL4A2	COL4A2	PPI
GPX2	GPX2	PPI
LUM	COL1A2	PPI
CD69	CD69	PPI
VWF	COL1A1	PPI
CXCR4	CXCR4	PPI
CCL5	VCAN	PPI
VCAN	VCAN	PPI
TNFRSF10A	TNFRSF10A	PPI
VWF	COL1A2	PPI
THBS2	THBS2	PPI
PDGFRA	STAT1	PPI

## Sheet: Initially from BCLC stage 0 HCC
Protein1	Protein2	Iteraction type			#PPI is protein-protein interaction,TRI is transcriptional regulatory interaction.
FOS	HBA1	TRI			#When interaction is TRI, Protein1 is transcription factor, Protein2 is target gene.
S100A9	S100A9	PPI
TPM2	TPM2	PPI
IL8RB	CXCL6	PPI
IGFALS	IGF1	PPI
CD36	COL1A2	PPI
EIF5	EIF1AY	PPI
SMARCA4	ESR1	PPI
NEK2	NDC80	PPI
CTSB	IGF1	PPI
CDK6	CDK6	PPI
HBA1	HBB	PPI
NCOA2	ESR1	PPI
IFNAR1	PTPRC	PPI
CLEC4M	CLEC4M	PPI
HEY1	HEY1	PPI
KHDRBS1	KHDRBS1	PPI
IGFBP3	FN1	PPI
SMURF2	SF3A2	PPI
ESR1	DUT	PPI
SNTB2	SNTB2	PPI
MAPKAPK2	MAPKAPK2	PPI
CAT	CAT	PPI
SH3KBP1	SOS1	PPI
TBL1XR1	NCOR1	PPI
FN1	COL4A2	PPI
PTK2	SOCS2	PPI
IL6ST	LIFR	PPI
ANGPT1	ANGPT1	PPI
MDK	MDK	PPI
ETS2	NCOR1	PPI
CLU	PON1	PPI
SYT9	SYT9	PPI
TAF15	SF1	PPI
RALBP1	CCNB1	PPI
THRSP	THRSP	PPI
CENPF	CENPF	PPI
IL1RAP	IL1B	PPI
PTK2	PTK2	PPI
CXCL12	CXCR4	PPI
ASS1	ASS1	PPI
FOS	LMNA	PPI
ALDOB	ALDOB	PPI
ENPEP	ENPEP	PPI
FCGR2B	LY6E	PPI
YWHAB	OSBPL3	PPI
NR1I3	CYP2C9	TRI
CLDN1	CLDN1	PPI
SERPINE2	COL4A1	PPI
CDKN2C	CDK6	PPI
C7	CLU	PPI
KLF6	EHMT2	PPI
PPP2R1B	HSPD1	PPI
PRKAR2B	PRKAR2B	PPI
OAT	OAT	PPI
ESR1	CTNNB1	PPI
TNPO1	TNPO1	PPI
CIDEB	CIDEB	PPI
TNFRSF10D	TNFRSF10D	PPI
PPARA	LPAL2	TRI
TPD52L1	TPD52L1	PPI
C1S	C1S	PPI
TPR	IFI16	PPI
LEF1	CTNNB1	PPI
STAT1	CYBB	TRI
HMOX1	HMOX1	PPI
PLA2G4C	PLA2G4C	PPI
DVL3	DVL3	PPI
FCN1	FCN1	PPI
LCN2	LCN2	PPI
COL1A2	SHBG	PPI
SCAMP1	SCAMP1	PPI
CD46	CD46	PPI
SMURF2	DAB2	PPI
PFN2	PFN2	PPI
ADRA1A	IL8RB	PPI
NR1H4	ESR1	PPI
CDH1	RRM2	PPI
TRIB1	MAP2K1	PPI
KPNA2	KPNA2	PPI
CTSB	CTSB	PPI
RGS5	GNAO1	PPI
CXCL12	CXCL12	PPI
ESR1	MLL2	PPI
GSTZ1	GSTZ1	PPI
ESR1	HSPA4	PPI
IL8RB	IL8RB	PPI
FCN3	FCN3	PPI
PPARA	PPARA	PPI
SGOL2	PPP2R1B	PPI
INSR	SOCS2	PPI
SQSTM1	SQSTM1	PPI
SHBG	SHBG	PPI
KRAS	FNTB	PPI
CXCR4	PTPRC	PPI
FUS	FUS	PPI
RACGAP1	CHN2	PPI
ATXN1	EIF1AY	PPI
MARCKS	CTSB	PPI
S100A9	S100A8	PPI
DAB2	TGFBR1	PPI
GADD45B	ESR1	PPI
GNAO1	GNAO1	PPI
ADSSL1	ADSSL1	PPI
IGFBP3	COL1A1	PPI
CD36	COL1A1	PPI
PPFIBP1	PPFIBP1	PPI
PLA2G2A	DCN	PPI
CHD9	ESR1	PPI
AGA	AGA	PPI
CDH1	CDH1	PPI
MAOA	MAOA	PPI
CTH	CTH	PPI
IGHM	PTK2	PPI
PON1	ALB	PPI
ESR1	FOS	TRI
GHR	GHR	PPI
DAB2	MYO6	PPI
NCOA3	NCOA3	PPI
ATR	RHEB	PPI
UGP2	UGP2	PPI
HBG2	HBB	PPI
HSPA4	KPNA2	PPI
ICAM1	ICAM1	PPI
IGF1	IGFBP3	PPI
KHK	KHK	PPI
HBA2	HBA2	PPI
MCM4	MCM4	PPI
IGFALS	IGFBP3	PPI
GPLD1	APOA4	PPI
FN1	COL1A2	PPI
HBG2	HBG2	PPI
NCOR1	ESR1	PPI
TOP1	TOP1	PPI
DDX3Y	SHBG	PPI
ENAH	FAT	PPI
NCOR1	TBL1X	PPI
RECQL	RECQL	PPI
PRPF40A	PRPF40A	PPI
ABAT	ABAT	PPI
THY1	THY1	PPI
CLEC4G	CLEC4G	PPI
RELN	RELN	PPI
TAPBP	HLA-C	PPI
INSR	IGF2	PPI
SOCS2	GHR	PPI
SPEN	SOX9	PPI
DCN	COL1A1	PPI
CDC2	PTTG1	PPI
BAT1	BAT1	PPI
CLU	LEPR	PPI
EGR1	CDKN2A	PPI
CDK6	CDKN2A	PPI
GCHFR	GCHFR	PPI
HGS	EHMT2	PPI
CTNNB1	CDK6	PPI
CD36	ITGA6	PPI
THBS1	TFPI	PPI
CADM1	CADM1	PPI
PRKDC	PRKDC	PPI
CCNB2	CDC2	PPI
CBFA2T2	NCOR1	PPI
SOS1	SOS1	PPI
SMARCA4	SMARCC1	PPI
F11	HGF	PPI
IL1RAP	PRPF40A	PPI
HBB	HBA2	PPI
ALB	AGA	PPI
FEZ1	OLFML3	PPI
DCN	COL4A1	PPI
GLUD1	GLUD1	PPI
GLUD2	GLUD2	PPI
HIBADH	HIBADH	PPI
ATXN1	ATXN1	PPI
S100A10	S100A10	PPI
HGF	LCN2	PPI
PPP2R1B	CDC2	PPI
NEK2	NEK2	PPI
INHBE	INHBE	PPI
CDKN2C	CDKN2A	PPI
DPT	DCN	PPI
CBX3	CBX3	PPI
SMARCA4	TMF1	PPI
TKT	TKT	PPI
SMURF2	TFPI2	PPI
IL8RB	CXCL2	PPI
PTPRC	INSR	PPI
IGF2	IGFBP3	PPI
BCL2L10	BCL2L10	PPI
THBS1	COL3A1	PPI
RRM1	RRM1	PPI
ESR1	SOS1	PPI
INSR	INSR	PPI
NPHP3	NPHP3	PPI
SPEN	NCOR1	PPI
AZGP1	AZGP1	PPI
TFPI2	F11	PPI
CDKN2A	CDKN2A	PPI
STAT1	MDK	PPI
MBL2	MBL2	PPI
HSP90AB1	ESR1	PPI
SYNC1	DTNA	PPI
CDKN2A	HSP90AB1	PPI
ZHX2	ZHX2	PPI
LMNA	LMNA	PPI
PECAM1	PECAM1	PPI
TPM2	TPM1	PPI
GPC3	IGF2	PPI
KPNB1	IGFBP3	PPI
PEA15	PLD1	PPI
FCGR2B	CRP	PPI
FBP1	FBP1	PPI
MAP2K1	MAP2K1	PPI
IL8	IL8RB	PPI
DCN	COL1A2	PPI
NCOR1	NCOR1	PPI
CHN2	TGFBR1	PPI
FCN2	MASP1	PPI
ACLY	ACLY	PPI
TGFBR1	TGFBR1	PPI
THBS1	CD36	PPI
SMARCA4	CTNNB1	PPI
DBH	DBH	PPI
RAP2A	RAP2A	PPI

## Sheet: Initially from BCLC stage A HCC
Protein1	Protein2	Iteraction type			#PPI is protein-protein interaction,TRI is transcriptional regulatory interaction.
TPM1	JUN	PPI			#When interaction is TRI, Protein1 is transcription factor, Protein2 is target gene.
KPNA2	CSNK1A1	PPI
MASP1	MBL2	PPI
SMURF2	SPG20	PPI
GLS2	PAG1	PPI
PPARA	PTGS2	TRI
NBR1	NBR1	PPI
C2	MASP1	PPI
CCR1	CCL4	PPI
FOS	HLA-DRA	TRI
CTSS	SLPI	PPI
PCOLCE	COL3A1	PPI
BIRC5	BIRC5	PPI
CDC37L1	CDC37L1	PPI
FOS	CCL4	TRI
TNFRSF11B	FN1	PPI
SQSTM1	NBR1	PPI
NAP1L1	NAP1L1	PPI
GNAI1	GNAI1	PPI
TBX3	TBX3	PPI
DIO1	DIO1	PPI
TRIM11	TRIM11	PPI
TEK	TEK	PPI
C1R	C1R	PPI
DPP4	CXCL12	PPI
YWHAB	RALGPS2	PPI
SERPINE1	UBQLN4	PPI
CLU	C9	PPI
SPP1	UBQLN4	PPI
GGA1	GGA1	PPI
CDA	CDA	PPI
THBS1	DCN	PPI
DAB2	CDC2	PPI
SOCS3	INSR	PPI
CDKN2A	AHNAK	PPI
FN1	DCN	PPI
ADH1A	ADH1A	PPI
FOS	MT2A	TRI
PPOX	PPOX	PPI
MT1G	SHBG	PPI
ALDH3A1	ALDH3A1	PPI
MNDA	CDC2	PPI
SEPT4	SEPT4	PPI
BUB3	BUB1B	PPI
CRLS1	MCM6	PPI
MCM4	MCM6	PPI
PTPRC	SKAP1	PPI
RPL5	RPL5	PPI
MCM6	MCM6	PPI
HGS	UBQLN4	PPI
CCL4	IL8	PPI
FEZ1	NBR1	PPI
AR	AR	PPI
UBQLN4	UBQLN4	PPI
EZH2	SUZ12	PPI
CDC2	KIF11	PPI
MATN2	MATN2	PPI
CCR1	CCL2	PPI
GNAO1	GNAI1	PPI
MT1F	SHBG	PPI
MUT	MUT	PPI
CD84	CD84	PPI
JUN	TOP1	PPI
CASP1	LMNA	PPI
UBE2C	UBE2C	PPI
MCM5	CDKN2A	PPI
MT2A	SHBG	PPI
HGFAC	HGF	PPI
SRGN	UBQLN4	PPI
ITGA9	ITGA9	PPI
CRYAA	ALB	PPI
CRYAA	CRYAA	PPI
FBLN1	VCAN	PPI
KPNA2	RECQL	PPI
CCL4	CCL4	PPI
PRKDC	HMGB2	PPI
CCL2	VCAN	PPI
CCR1	CCR1	PPI
KIF11	KIF11	PPI
GCH1	GCH1	PPI
TRRAP	ESR1	PPI
TNFRSF11B	VWF	PPI
MCM7	MCM7	PPI
LCP1	LCP1	PPI
C8A	C9	PPI
AR	AR	TRI
TNFRSF11B	THBS1	PPI
ATF3	NUF2	PPI
ARHGEF11	ARHGEF11	PPI
TIAM1	TIAM1	PPI
CAP2	PRPF40A	PPI
CDC2	BIRC5	PPI
IL1RL1	IL33	PPI
TTR	TTR	PPI
FBLN1	FBLN1	PPI
CD1D	PTPRC	PPI
NAB1	EGR1	PPI
NDC80	NUF2	PPI
ECM1	FBLN1	PPI
LCP2	PTPRC	PPI
CDC2	ECT2	PPI
DEFB1	RIF1	PPI
EGR1	ABCB1	TRI
CXCL12	FN1	PPI
CTSB	SLPI	PPI
SRGAP2	ROBO1	PPI
OGT	OGT	PPI
ADAMTS1	VCAN	PPI
CDA	KPNA2	PPI
AURKA	NUF2	PPI
MDK	UBQLN4	PPI
KCNJ8	KCNJ8	PPI
ETS2	VWF	TRI
PBX1	UGT2B17	TRI

## Sheet: Initially from BCLC stage B HCC
Protein1	Protein2	Iteraction type			#PPI is protein-protein interaction,TRI is transcriptional regulatory interaction.
PRUNE	PRUNE	PPI			#When interaction is TRI, Protein1 is transcription factor, Protein2 is target gene.
DCLRE1C	NBN	PPI
MDK	TSPAN1	PPI
TNFRSF19	TRAF5	PPI
SMC2	SMC4	PPI
TP53	HSP90AB1	TRI
MELK	MBP	PPI
SPTAN1	PRKCB1	PPI
TP53	CYP3A7	TRI
F5	PROS1	PPI
TP53	EHD3	TRI
LOX	DPT	PPI
F8	VWF	PPI
PTTG1	TP53	PPI
INSR	PTK2	PPI
HRAS	AGTR1	PPI
LYN	EPOR	PPI
SLC22A1	POU2AF1	PPI
PPARBP	PPARA	PPI
PRMT2	ESR1	PPI
SFN	CDC2	PPI
ZMYND8	PRKCB1	PPI
CTPS2	CTPS2	PPI
LOX	LOX	PPI
TP53	FIGNL1	TRI
CCR1	CCL5	PPI
NR5A2	ABCC3	TRI
CD47	ITGAV	PPI
STAT1	INDO	TRI
MAD2L1	MBL2	PPI
LYN	LYN	PPI
STMN1	UBQLN4	PPI
CYBB	CYBA	PPI
SGK	KPNA2	PPI
SETDB1	SULT1E1	PPI
TP53	SCAMP1	PPI
MCM3	STAT1	PPI
DHX30	NCOR1	PPI
CSE1L	STAT1	PPI
UBQLN4	PBXIP1	PPI
SMAD2	ESR1	PPI
SMURF2	SMAD2	PPI
OAT	UBQLN4	PPI
KCNK1	KCNK1	PPI
SETDB1	GIPC2	PPI
C1QC	C1QA	PPI
RPL5	KPNB1	PPI
RAB4A	TP53	PPI
HAMP	SLC40A1	PPI
GPLD1	APOA1	PPI
NR1I3	PPARGC1A	PPI
SKAP1	LYN	PPI
CDK6	TGFBR1	PPI
PPARGC1A	ESR1	PPI
TP53	IGFBP3	TRI
C5	C5	PPI
H2AFZ	H2AFZ	PPI
TPX2	AURKA	PPI
PTPRC	LYN	PPI
LYN	CSF2RB	PPI
CD24	LYN	PPI
CSF2RB	CSF2RB	PPI
CD8A	PTPRC	PPI
ASL	ASL	PPI
TPX2	TPX2	PPI
HIST1H1C	NASP	PPI
CKS1B	CKS1B	PPI
ZNF451	PRPF40A	PPI
GGA1	SORL1	PPI
NR1I3	PPARBP	PPI
RAD54B	RAD54B	PPI
MAFB	MAFB	PPI
SMAD2	SQSTM1	PPI
DNMT3A	EZH2	PPI
TK1	SETDB1	PPI
PLEK	PLEK	PPI
ARL4A	KPNA2	PPI
CSF2RB	PRKCB1	PPI
MCM3	MCM6	PPI
IFT57	IFT57	PPI
IGHM	UBQLN4	PPI
CBS	CBS	PPI
LGALS3BP	CD14	PPI
TK1	TP53	PPI
TP53	HELLS	TRI
MTMR2	MTMR2	PPI
UBQLN4	C1QTNF1	PPI
PRMT2	PRMT2	PPI
SDSL	SDSL	PPI
NPR2	NPR2	PPI
LIMS1	EHMT2	PPI
ETS2	ANPEP	TRI
CTSB	RGS2	PPI
CSF2RB	STAT1	PPI
EGR1	APOA1	TRI
CCAR1	SFN	PPI
HRAS	INSR	PPI
C7	C5	PPI
INSR	KHDRBS1	PPI
MAD2L1	INSR	PPI
MAL2	TPD52L1	PPI
CSE1L	CDH1	PPI
SETDB1	OLFML3	PPI
C1QC	C1QB	PPI
YWHAB	INSR	PPI
ATXN1	UBAP2L	PPI
TP53	HIGD1A	TRI
MCM3	MCM7	PPI
TP53	FAS	TRI
APOA1	APOF	PPI
GMNN	MCM6	PPI
APOA1	APOA1	PPI
TAF6	TAF6	PPI
FYB	LCP2	PPI
ESR1	JUNB	PPI
APOA1	CETP	PPI
MCM5	MCM3	PPI
IGF1	IGFBP5	PPI
PDIA5	UBQLN4	PPI
C1QB	C1QA	PPI
MCM5	MCM7	PPI
TP53	PDGFC	TRI
KPNA2	TP53	PPI
NDRG1	MME	PPI
AR	CDK6	PPI
BMPR2	BMPR2	PPI
LYN	FCGR2B	PPI
TARDBP	SETDB1	PPI
SMAD2	SMAD2	PPI
TCF3	CTNNB1	PPI
HRAS	SOS1	PPI
S100A8	TP53	PPI
HAVCR2	HAVCR2	PPI
HMMR	TPX2	PPI
MAD2L1	CSF2RB	PPI
UBQLN4	NOTCH2NL	PPI
SMYD2	TP53	PPI
PPP2R1B	MCM3	PPI
SNRPB	SNRPB	PPI
SMAD2	INSR	PPI
PRKAR2A	PRKAR2A	PPI
C1R	C1QB	PPI
ANPEP	ANPEP	PPI
ASXL2	PRPF40A	PPI
LCP2	LYN	PPI
PPARBP	ESR1	PPI
ANGPTL3	ITGAV	PPI
CDKN2A	GMNN	PPI
MBP	HLA-DRA	PPI
DNMT3L	DNMT3A	PPI
TP53	IFI16	PPI
PRPF40A	UBQLN4	PPI
NMT2	TP53	PPI
HSP90AB1	TP53	PPI
MKI67	MKI67	PPI
TP53	CCNA2	PPI

## Sheet: Initially from BCLC stage C HCC
Protein1	Protein2	Iteraction type			#PPI is protein-protein interaction,TRI is transcriptional regulatory interaction.
PRKAR2A	MAP2	PPI			#When interaction is TRI, Protein1 is transcription factor, Protein2 is target gene.
CDC7	CDKN2A	PPI
TMSB10	TMOD1	PPI
NTS	SORT1	PPI
CTLA4	CTLA4	PPI
SNRPD2	SNRPD2	PPI
BLM	FEN1	PPI
DNMT1	DNMT1	PPI
HDAC2	PTMA	PPI
CLEC3B	PLG	PPI
HMGA1	IGFBP1	TRI
RRAS2	PTPN1	PPI
SMAD2	DYNC1H1	PPI
FBN1	DCN	PPI
SMAD2	KHDRBS1	PPI
EED	EZH2	PPI
DBF4	MCM7	PPI
MAP3K5	MAP3K5	PPI
HSPA4	CDC73	PPI
TRIM24	TRIM28	PPI
AR	IFI16	PPI
BCR	PLCG1	PPI
FBLIM1	PLEKHC1	PPI
PRKCA	PRKCA	PPI
KIF2C	KIF2C	PPI
PRKCE	PRKCE	PPI
CSNK1D	TP53	PPI
VIPR1	PTMA	PPI
KNG1	KNG1	PPI
CENPF	SNAP25	PPI
GRB2	SH3KBP1	PPI
TRIM39	TRIM39	PPI
TP53	RRM2B	TRI
MATN2	COL4A5	PPI
PIK3R1	IFNAR1	PPI
SMAD2	RXRA	PPI
CDC2	PTCH1	PPI
DBF4	CDC7	PPI
YWHAG	PCTK1	PPI
SLC16A1	BSG	PPI
FOXM1	APOB	TRI
MCM3	PLK1	PPI
MCM10	CDC7	PPI
SKAP1	LCK	PPI
HEATR1	XRN1	PPI
SHC1	PAK1	PPI
FBXO5	CDC20	PPI
TIAM1	NME1	PPI
MCM10	CDC45L	PPI
F2	F2RL1	PPI
CDC2	NES	PPI
SMARCA4	HSF1	PPI
YWHAG	CHEK1	PPI
CDKN2C	CDK4	PPI
SH3RF1	SEMA6A	PPI
JUNB	BCL6	PPI
NPR3	NPR3	PPI
PLG	ANXA2	PPI
CHEK1	CDC25C	PPI
EXOSC4	UPF3B	PPI
MCM5	ORC6L	PPI
PCNA	MSH2	PPI
LYN	HCLS1	PPI
ALB	F7	PPI
HSPA4	NR3C2	PPI
CD36	YES1	PPI
CDK5	MAP2K1	PPI
TRIM6	TRIM6	PPI
EGR1	TGFB1	TRI
AURKB	CENPA	PPI
KITLG	KITLG	PPI
SYNE1	SYNE1	PPI
POLA1	CDC2	PPI
HDAC2	CDH1	PPI
PAK1	COL1A1	PPI
KNG1	PLG	PPI
PLK1	PRC1	PPI
PLCG1	CTSS	PPI
GRN	SLPI	PPI
PYCRL	PYCRL	PPI
RXRA	ACADM	TRI
CBL	YWHAZ	PPI
MCM10	MCM4	PPI
MMP9	CXCL5	PPI
SORBS2	PKM2	PPI
ITGA2	MMP1	PPI
G6PD	G6PD	PPI
SHC1	RET	PPI
LCK	MED28	PPI
SHC1	MME	PPI
TNC	PTPRB	PPI
GNAO1	RGS10	PPI
SMAD2	MAPK9	PPI
LYN	MME	PPI
TCERG1	SETDB1	PPI
NR2F1	F9	TRI
GGH	GGH	PPI
KLRD1	KLRD1	PPI
MMAA	MUT	PPI
RAN	PTMA	PPI
FOXM1	CYP7A1	TRI
DCXR	DCXR	PPI
CCNB2	MCM2	PPI
PPARBP	MED12	PPI
F2	HGFAC	PPI
PRKCD	INSR	PPI
JUN	VIM	TRI
ABCG1	ABCG1	PPI
MELK	LMNB1	PPI
SFN	MAP3K5	PPI
SAP130	ARID4B	PPI
RAB17	SMURF2	PPI
MX1	TRPC1	PPI
NFYA	CDC2	TRI
FN1	C1QA	PPI
CBL	LTK	PPI
PABPC1	PABPC1	PPI
PLP2	SHBG	PPI
GRB2	GRB2	PPI
ATXN1	YWHAZ	PPI
MCM4	ORC6L	PPI
SOCS7	PLCG1	PPI
YWHAZ	HMGN1	PPI
TAX1BP3	GLS2	PPI
NOV	IGF2	PPI
TOPBP1	TOPBP1	PPI
PRKCA	KIT	PPI
DNAJB9	TCEA2	PPI
STK39	MBP	PPI
LCK	CD3E	PPI
SERPINA1	SERPINA1	PPI
TOB1	SMAD2	PPI
WWC1	CDC73	PPI
RASAL2	YWHAG	PPI
TP53	LAMA4	PPI
BSG	BSG	PPI
HIST2H2BE	GADD45A	PPI
SLC16A2	SERPINA7	PPI
MID1IP1	MID1	PPI
BMPER	BMP2	PPI
PTPN1	GRB2	PPI
KSR1	MAP2K1	PPI
ATP1A1	EZH2	PPI
CBX1	DNMT1	PPI
MMP12	LPA	PPI
CRLS1	MCM7	PPI
KRT19	HGS	PPI
YES1	YES1	PPI
TP53	SLC44A5	TRI
PLK1	CDC25C	PPI
MAPK9	SF3B4	PPI
LCK	PTK2	PPI
MAPKAPK2	SHC1	PPI
XPO5	RAN	PPI
KPNB1	CSE1L	PPI
XK	PRKCA	PPI
CDK5	NES	PPI
F2	SPP1	PPI
AURKB	NUF2	PPI
PTPN1	LTK	PPI
MYEF2	ENO3	TRI
PPM1A	PRKCD	PPI
PPIA	S100A8	PPI
ITGB3BP	ESR1	PPI
MCM10	MCM3	PPI
MMP12	F12	PPI
TP53	SULT1E1	PPI
KPNB1	TERF1	PPI
CBX1	CBX3	PPI
CDC2	FOXM1	PPI
MCM10	MCM2	PPI
DGKZ	HRAS	PPI
UTP14A	GADD45G	PPI
SOX9	MED12	PPI
MKI67	PRKCB1	PPI
DPP4	ADA	PPI
BCOR	HDAC6	PPI
CLK2	CLK2	PPI
CFH	CRP	PPI
SKAP1	GRB2	PPI
TXNRD1	PPP1R16A	PPI
INSR	FABP4	PPI
PFTK1	YWHAB	PPI
MAPK1	PLCB1	PPI
CSRP1	CSRP1	PPI
IL1RAP	PIK3R1	PPI
RALBP1	REPS2	PPI
SERPINI1	PLG	PPI
DOCK8	RHOQ	PPI
F2	F2	PPI
YWHAG	TIAM1	PPI
DDEF1	REPS2	PPI
SETDB1	TOB1	PPI
PPARA	CPT2	TRI
PRKDC	PCNA	PPI
KPNB1	RAN	PPI
PRKCD	DAB2	PPI
NAP1L1	TP53	PPI
GADD45G	PCNA	PPI
TRPV2	TRPV2	PPI
RAN	MBP	PPI
ACADM	ACADM	PPI
MCM7	MCM2	PPI
CPSF6	UBQLN4	PPI
WASF1	IL8	PPI
TCERG1	NPM1	PPI
GRB2	NPM1	PPI
CACYBP	S100P	PPI
PTN	APOBEC3G	PPI
PPAP2B	SHC1	PPI
SMYD3	POLR2K	PPI
FADD	RALBP1	PPI
CPSF1	MCM2	PPI
YWHAZ	HSPA1B	PPI
TACC3	TTF2	PPI
CDC2	VIM	PPI
KCNK1	UBE2I	PPI
PRKCD	ADRB2	PPI
ANXA3	TP53	PPI
SYT1	SYT1	PPI
PTPN1	INSR	PPI
RXRA	APOA1	TRI
TP53	SFN	TRI
TCEA2	WDR47	PPI
TIAM1	PRKCE	PPI
FNTA	HRAS	PPI
CSNK1D	DVL3	PPI
TP53	PCNA	TRI
TP53	CDC25C	PPI
NLRP1	NLRP1	PPI
NRCAM	NRCAM	PPI
HK2	UBQLN4	PPI
CD36	LYN	PPI
CFH	THBS1	PPI
CDC2	NPM1	PPI
PER3	PER1	PPI
CDC6	PCNA	PPI
THRAP4	PPARA	PPI
HTRA2	BIRC3	PPI
AGL	PRKAB1	PPI
BCR	SFN	PPI
PPM1A	SMAD2	PPI
SIX1	SIX1	PPI
TUBA1B	TUBG1	PPI
TRPC1	HOMER1	PPI
SPHK1	LYN	PPI
NDRG1	MAOA	PPI
YWHAG	YWHAG	PPI
DDEF2	REPS2	PPI
SMC2	NCAPD2	PPI
EPRS	SYNCRIP	PPI
KLKB1	F12	PPI
C20orf20	TRRAP	PPI
RGS2	PRKCA	PPI
MMP9	PLG	PPI
SOX9	CD3E	TRI
GRIA3	LYN	PPI
AURKA	CDC25B	PPI
SOX9	HSPA1A	PPI
KIF5B	SNAP25	PPI
SMAD2	LEF1	PPI
MELK	CDC25B	PPI
ZHX2	NFYA	PPI
CHMP4C	CHMP4C	PPI
PTN	GLYAT	PPI
BMP2	ASCL1	PPI
KIF23	RACGAP1	PPI
AURKB	RACGAP1	PPI
GADD45B	PCNA	PPI
DNMT3A	DNMT1	PPI
COMT	TRIP13	PPI
UBE2Z	TGFBR1	PPI
CDC45L	MCM7	PPI
GPD1	PTN	PPI
BAG2	HSPA1A	PPI
UPP2	VIM	PPI
LYN	PRKCD	PPI
RBP1	SAP30	PPI
SELENBP1	TRIP13	PPI
CDC7	MCM4	PPI
GNMT	PLEKHF2	PPI
IRF1	CCL5	TRI
CEP55	AKAP9	PPI
EDD1	KPNB1	PPI
F11	F2	PPI
CPE	UTP14A	PPI
TNPO1	RAN	PPI
ITGB3BP	RXRA	PPI
MATN2	COL1A1	PPI
THY1	ITGAV	PPI
CDC25C	LCK	PPI
SGK3	ITCH	PPI
UTP14A	CEP70	PPI
SHC1	PRKCD	PPI
HSPB1	HSPB8	PPI
HSPB8	BAG3	PPI
MRPL10	MRPL10	PPI
PLK1	ECT2	PPI
ANXA2	S100A10	PPI
PRKCB1	LMNB1	PPI
GNAO1	RGS1	PPI
GNA14	ADRB2	PPI
PLP2	PLP2	PPI
TP53	GPC3	TRI
NCOA6	PRKDC	PPI
GSTA1	GSTA1	PPI
PIAS3	NCOA2	PPI
LMNB1	LMNA	PPI
PLCG1	LIFR	PPI
SFN	C8orf32	PPI
KPNA2	ITK	PPI
WASF1	GRB2	PPI
ARHGEF3	RHOB	PPI
NCOA7	ESR1	PPI
CDC2	LMNB1	PPI
PTK2	LYN	PPI
F2	SERPINE1	PPI
ATXN1	ZHX2	PPI
TP53	LASP1	TRI
ITGA2	COL1A2	PPI
OPTN	FOS	PPI
HSPB1	TGFB1I1	PPI
RAD1	FEN1	PPI
STK17B	STK17B	PPI
C1S	C1QA	PPI
PPARBP	TP53	PPI
PRKCD	PLCB1	PPI
GZMA	HMGB2	PPI
CKAP5	AURKA	PPI
KITLG	KIT	PPI
ESR1	UBE2I	PPI
TP53	WNK1	TRI
ETV4	IL8	TRI
ETV4	FOS	TRI
S100A8	RAB17	PPI
SLC16A3	BSG	PPI
PEBP1	PEBP1	PPI
HMGA1	JUN	PPI
PPARGC1A	RXRA	PPI
PLK1	BUB1	PPI
NCOA3	JUN	PPI
FN1	F13A1	PPI
ANPEP	CRP	TRI
HGS	MAP3K7	PPI
SMARCA2	KHDRBS1	PPI
TRAF5	CD27	PPI
CHEK1	TP53	PPI
F8	F2	PPI
F7	F7	PPI
GGA3	GGA3	PPI
GNE	RIF1	PPI
PLAT	SERPINI1	PPI
PAK1	MAP2K1	PPI
BIN1	DDEF2	PPI
MCM6	MCM2	PPI
DVL3	PPM1A	PPI
VIM	TRIM28	PPI
NCOA6	NCOA6	PPI
ORC6L	MCM7	PPI
NME1	KSR1	PPI
PBX2	PBX2	PPI
KIF23	PLK1	PPI
AATF	CHEK1	PPI
AGR2	UBQLN4	PPI
KLKB1	KNG1	PPI
LMAN1	F8	PPI
RPS6KA3	RPS6KA3	PPI
PRKCA	PLD1	PPI
STIP1	HSPA1A	PPI
RALBP1	RALA	PPI
LYN	CTLA4	PPI
PCTK1	PCTK1	PPI
HIST1H2BG	PTMA	PPI
CDC7	MCM2	PPI
PAFAH1B3	PAFAH1B3	PPI
CYC1	CYC1	PPI
ESR1	F12	TRI
RAN	SMURF2	PPI
DGAT1	DGAT1	PPI
AP2B1	BUB1	PPI
NCAPG	HSF2	PPI
PPIA	BSG	PPI
CDK4	RFC4	PPI
SMAD2	KPNB1	PPI
WASF2	GRB2	PPI
RNPS1	UBQLN4	PPI
PCNA	PCNA	PPI
AKAP12	ADRB2	PPI
UBQLN4	MIF4GD	PPI
INSR	SHC1	PPI
TAF6	SH3KBP1	PPI
IGFBP3	F2	PPI
PRKCB1	ANXA2	PPI
CDC2	FEN1	PPI
DDEF2	RAN	PPI
LYN	CDC2	PPI
AKAP12	PRKCA	PPI
PRKDC	PRKCD	PPI
CDCA8	CDCA8	PPI
C4BPB	PROS1	PPI
BCL2A1	BAX	PPI
COL4A2	SAA1	PPI
RBP1	HDAC2	PPI
ACOX1	SCP2	PPI
PABPC1	PCBP2	PPI
SERPINB9	SETDB1	PPI
AR	ESR1	PPI
SAP30	HIST2H2BE	PPI
GRK5	ADRB2	PPI
CBX3	TRIM28	PPI
AR	CCNE1	PPI
TP53	CYP4F2	TRI
NCOA2	AR	PPI
U2AF2	KIAA0907	PPI
SAP30	NCOR1	PPI
CDC6	MCM2	PPI
NPM1	TP53	PPI
YWHAG	DYNC1H1	PPI
TRIP13	STAMBPL1	PPI
PLA1A	ANXA2	PPI
PIK3R1	ESR1	PPI
DAXX	DNMT1	PPI
F8	PROS1	PPI
PRKCA	TOP2A	PPI
NFYA	CCNA2	TRI
ETV4	MMP9	TRI
CDCA8	AURKB	PPI
SHARPIN	SHARPIN	PPI
FOS	TGFB1	TRI
PRKCA	TP53	PPI
NPM1	SHC1	PPI
TP53	DNMT1	TRI
INDO	PPP1R16A	PPI
ADAM9	ITGAV	PPI
SETDB1	TRIM28	PPI
YWHAZ	PCTK1	PPI
MCM4	MCM7	PPI
ADCY7	PRKCD	PPI
CENPH	CENPH	PPI
BLM	CHEK1	PPI
TP53	AFF3	TRI
F9	F2	PPI
IGFALS	IGFBP5	PPI
CDC2	RAB4A	PPI
HGS	UBE2I	PPI
HDAC2	SAP30	PPI
TCEA2	TAX1BP3	PPI
HGS	MIF4GD	PPI
ADAM9	PRKCD	PPI
CDC2	FANCG	PPI
GADD45G	PTN	PPI
MCM10	CDK6	PPI
HIP1	HIP1	PPI
MELK	CDC5L	PPI
IRF1	CXCL10	TRI
THRAP4	RXRA	PPI
CAPN3	CAPN3	PPI
ESR1	NQO1	TRI
BCL2A1	GRB2	PPI
FOXM1	APOA1	TRI
PRUNE	NME1	PPI
FNTA	CENPF	PPI
PPARBP	RXRA	PPI
PLG	HRG	PPI
DAXX	DAXX	PPI
PRKCA	PEA15	PPI
SETDB1	DNMT3A	PPI
EED	TGS1	PPI
SMARCC1	CCNE1	PPI
TCEA2	AKT1S1	PPI
SMAD2	EDD1	PPI
SHC1	LTK	PPI
SERPINE2	F2	PPI
BMP2	BMP2	PPI
KIT	KIT	PPI
SNRPA	SNRPA	PPI
GLA	GLA	PPI
C1R	C1QA	PPI
CDC7	MCM3	PPI
LBR	LBR	PPI
EPAS1	EIF3S6	PPI
BUB3	BUB1	PPI
CASP8	VIM	PPI
DYRK2	RAD54B	PPI
PDLIM5	PRKCE	PPI
FOXM1	U2AF2	TRI
SPAG5	CDC2	PPI
MKI67	CBX5	PPI
NEU1	CTSA	PPI
EHHADH	SCP2	PPI
PRMT6	HMGA1	PPI
AR	IL6ST	PPI
HRAS	CDC25C	PPI
SETDB1	HDAC2	PPI
PRKCA	ANXA2	PPI
YWHAB	CDC25C	PPI
SHC1	LYN	PPI
YWHAG	RACGAP1	PPI
BCL2L10	BAX	PPI
IGFBP5	F2	PPI
PLAG1	KPNA2	PPI
SULT1E1	BMPR2	PPI
YWHAG	GTPBP4	PPI
MAPK13	MBP	PPI
YWHAZ	CSF2RB	PPI
CEBPD	HPX	TRI
MAP3K5	TRAF5	PPI
ITPR2	TRPC1	PPI
CDK5	PCTK1	PPI
CDC2	NDE1	PPI
CDC45L	POLA1	PPI
NFATC3	FOS	PPI
MCM7	MCM6	PPI
PRKCD	LMNB1	PPI
TUBA1B	PIK3R1	PPI
NCOA6	GHR	PPI
NCOA3	RXRA	PPI
TOPBP1	EDD1	PPI
CDC6	CCNA2	PPI
SOS1	BIN1	PPI
PSMD4	TCF3	PPI
APOA1	TTR	PPI
DMD	UTRN	PPI
GADD45A	GADD45A	PPI
DMD	KRT19	PPI
FAS	PRKCA	PPI
PLAT	ANXA2	PPI
MINK1	YWHAZ	PPI
F9	F8	PPI
PCNA	CDC2	PPI
PRKCA	HSPA1A	PPI
TRIP13	PBLD	PPI
PRKCA	CD163	PPI
NDE1	TUBG1	PPI
RFC3	RFC4	PPI
CBX3	LBR	PPI
MATN2	COL4A2	PPI
POLR2K	POLR2K	PPI
RFX5	HDAC2	PPI
YWHAB	KIF23	PPI
AVPR1A	PRKCA	PPI
RAN	SMAD2	PPI
CDC5L	MCM5	PPI
NDRG1	ILF3	PPI
CDC25C	CCNB1	PPI
ANAPC7	BUB1B	PPI
EIF4G3	PABPC1	PPI
HSPB1	CRYAA	PPI
CBX5	SMARCA4	PPI
AURKB	BIRC5	PPI
THBS1	F2	PPI
GPHN	TUBA4A	PPI
GADD45G	PPARA	PPI
NDRG1	KIF5B	PPI
RXRA	IGFBP3	PPI
CDC7	CDK4	PPI
TP53	RECK	TRI
MCM4	MCM3	PPI
AR	JUN	PPI
IRAK2	HRAS	PPI
TP53	OPTN	TRI
YWHAZ	CDC25B	PPI
RAB3IP	SSX2	PPI
TP53	PRKCE	TRI
GREM2	BMP2	PPI
PLK1	CCNB1	PPI
PKM2	PKM2	PPI
MCM10	CDKN2A	PPI
YWHAZ	SNF1LK	PPI
DNMT3A	EED	PPI
TP53	PAFAH1B3	PPI
CDC6	CDKN2A	PPI
PTBP2	PTBP2	PPI
SPAG4	SPAG4	PPI
SETDB1	ZFP64	PPI
PRKCA	GPM6A	PPI
IRAK1	JUN	PPI
JUN	MT2A	TRI
MAP3K7	FOS	PPI
GNA12	GNA12	PPI
CFP	CFB	PPI
BIN1	FBP1	PPI
MIF	MIF	PPI
LEF1	ADA	TRI
KCNMA1	PTK2	PPI
KIT	PRKCB1	PPI
ESR1	GNAI1	PPI
C8B	C5	PPI
PAFAH1B3	BRD7	PPI
ILF2	PRKDC	PPI
TP53	HSPB1	PPI
YWHAG	MCM5	PPI
KCNMA1	KCNMA1	PPI
RAMP3	RAMP3	PPI
HOMER2	DBN1	PPI
PON1	APOA1	PPI
THRAP4	ESR1	PPI
YWHAG	PRKCD	PPI
SYT9	SYNCRIP	PPI
MST1	MST1	PPI
GBP2	PAFAH1B3	PPI
NDRG1	EIF3S6	PPI
TTF2	MATR3	PPI
BCOR	MLLT3	PPI
PTMA	HSPA1A	PPI
S100A10	SETDB1	PPI
MMP2	IGFBP3	PPI
PTPN1	ESR1	PPI
MLLT3	MCM6	PPI
MYEF2	PVALB	TRI
ATXN1	BTG3	PPI
PPARA	PRKCD	PPI
CDC5L	MCM3	PPI
HDAC2	CDC20	PPI
NR1I2	PPARGC1A	PPI
COL4A5	FN1	PPI
TM4SF1	TUBA4A	PPI
PRKCA	ADD3	PPI
KRT19	FANCG	PPI
STK17A	STK17A	PPI
MLLT3	MLLT3	PPI
PRKCD	YWHAZ	PPI
CDC7	MCM7	PPI
PDLIM5	TRIM39	PPI
NOTCH3	MAML2	PPI
INSR	ADRB2	PPI
SERPINC1	SERPINC1	PPI
ANPEP	ADH1B	TRI
PLK1	TUBG1	PPI
SETDB1	RIF1	PPI
PAFAH1B3	SETDB1	PPI
YWHAG	LIMA1	PPI
IRF5	IRF5	PPI
CLEC4M	ICAM3	PPI
RAN	RAN	PPI
LMNA	UBE2I	PPI
NCOA3	NR1I2	PPI
PER1	CSNK1D	PPI
SIP1	SNRPD2	PPI
SFN	PLEKHF2	PPI
MCM5	MCM2	PPI
RAD54B	UBE2I	PPI
CSE1L	RAN	PPI
CBX1	TRIM24	PPI
TCERG1	HSPA1A	PPI
CDKN2A	MCM2	PPI
SF3B4	TCERG1	PPI
SPTAN1	TES	PPI
MINK1	YWHAB	PPI
KPNA2	CASP2	PPI
YWHAZ	PRKCA	PPI
TBCB	TUBA4A	PPI
STXBP6	SNAP25	PPI
SMURF2	ACBD3	PPI
CLEC3B	PLAT	PPI
PRSS2	SLPI	PPI
UBE2I	PRPF40A	PPI
MDC1	H2AFX	PPI
DOCK8	CDC42	PPI
SHC1	NGFR	PPI
BUB1B	CENPE	PPI
PPARA	ACADM	TRI
GADD45G	RXRA	PPI
IRAK1	HRAS	PPI
TOLLIP	TOLLIP	PPI
PTMA	CDK4	PPI
RAP1GAP	RAP1GAP	PPI
TGFB1	FNTA	PPI
MPDZ	CLDN1	PPI
HDAC2	TOP2A	PPI
PTK2	SELE	PPI
NR3C2	TRIM24	PPI
SMAD5	BCAT1	PPI
ANPEP	FOS	TRI
AR	F9	TRI
PRKCA	SLC1A1	PPI
C6	F2	PPI
TMF1	AR	PPI
SBF1	MTMR2	PPI
CKS2	CKS1B	PPI
PRKCA	SNAP25	PPI
PLG	SERPINC1	PPI
SMAD2	HGS	PPI
PTK2	GRB2	PPI
SMC4	NCAPD2	PPI
PAK1	ESR1	PPI
PABPC1	GSPT1	PPI
GADD45A	CDC2	PPI
TP53RK	TP53	PPI
MCM10	CDC6	PPI
PTPRC	GRB2	PPI
PRKCA	INSR	PPI
ESR1	U2AF2	TRI
TFPI	MMP12	PPI
MMP1	IGFBP3	PPI
ENO1	CXCL2	PPI
NR5A2	AFP	TRI
HSPA2	CDC2	PPI
GHR	GRB2	PPI
ITK	GRB2	PPI
MATN2	FN1	PPI
SETDB1	TOLLIP	PPI
HIST2H2BE	PTMA	PPI
FNTA	PTP4A3	PPI
CDK6	MCM2	PPI
RALA	PPP2R1B	PPI
TP53	NFYA	PPI
ORC6L	CDC6	PPI
PLK1	MCM2	PPI
CDK6	PCNA	PPI
RIPK2	NGFR	PPI
TRIP13	PLSCR4	PPI
PAK1	PRKCD	PPI
MMP1	CCL2	PPI
CBL	LYN	PPI
PCNA	CDC25C	PPI
IRF1	STAT1	TRI
SERPING1	C1R	PPI
CLSTN1	KIF2A	PPI
MIF	TP53	PPI
SPRY2	GRB2	PPI
QDPR	QDPR	PPI
NEK2	MAPK1	PPI
F2	PROZ	PPI
NR1I2	RXRA	PPI
TTR	FEZ1	PPI
CEP55	PLK1	PPI
FOS	VIM	TRI
GPSM2	GNAO1	PPI
PRKDC	LYN	PPI
SFN	ZFP36	PPI
CDK4	MCM2	PPI
GPSM2	HRAS	PPI
MAP2	GRB2	PPI
RB1CC1	PTK2	PPI
BLM	FANCD2	PPI
MKI67	CBX3	PPI
GRB2	ADA	PPI
KNG1	THBS1	PPI
MCM10	MCM6	PPI
PPARGC1A	PPARBP	PPI
AKAP9	CSNK1D	PPI
NDRG1	HSD17B4	PPI
GFRA1	RET	PPI
LCK	LCP2	PPI
PRKCA	MBP	PPI
ANPEP	HPX	TRI
RAMP3	VIPR1	PPI
TP53	SYNE1	TRI
NCOR1	RDBP	PPI
PRKCD	MBP	PPI
YWHAG	PABPC1	PPI
KLKB1	MST1	PPI
TP53	HSPA1A	PPI
DTNA	DMD	PPI
HABP2	KNG1	PPI
ASPM	PLK1	PPI
NR1I3	RXRA	PPI
VIM	KIF15	PPI
PRKAR2B	LASP1	PPI
MAPKAPK2	YWHAZ	PPI
PCDH17	UBQLN4	PPI
CNOT6	CNOT6	PPI
DACH1	UBE2I	PPI
CEP55	MAPK1	PPI
RECK	MMP9	PPI
NDRG1	PABPC1	PPI
CKAP5	CKAP5	PPI
CDC25C	CDC2	PPI
CASP8	HIP1	PPI
TUBG1	PIK3R1	PPI
SPEN	HDAC2	PPI
NR3C2	AR	PPI
UTP14A	TP53BP2	PPI
LGALS4	RRAS2	PPI
PNMA1	UBQLN4	PPI
CDC45L	MCM3	PPI
SETDB1	BARD1	PPI
DGKZ	DMD	PPI
PRKCA	HSPB8	PPI
ITCH	CPSF6	PPI
EDIL3	ITGAV	PPI
RAB27A	EXPH5	PPI
GLMN	FKBP1A	PPI
TUBB2C	TUBG1	PPI
C1S	SERPING1	PPI
FEZ1	HEATR2	PPI
PRIM1	TP53	PPI
PRKCA	SPP1	PPI
MTHFD1	MTHFD1	PPI
TP53	GNAI1	TRI
KRT19	TUBG1	PPI
CRYAA	CS	PPI
SORD	SORD	PPI
SYNCRIP	INSR	PPI
RXRA	GADD45A	PPI
TP53	KITLG	TRI
VIPR1	GNAI1	PPI
CDC7	MCM5	PPI
CCNE1	CDC2	PPI
HMGA1	RXRA	PPI
TP53	MSI2	TRI
SGTB	TMPO	PPI
TP53	CYP4F3	TRI
DBF4	MCM3	PPI
F2	SERPINC1	PPI
PRKCA	GJA1	PPI
MDC1	TP53	PPI
CFL1	YWHAZ	PPI
PTCH1	CCNB1	PPI
NCOA2	RXRA	PPI
YWHAZ	KIF5B	PPI
TJP2	CLDN1	PPI
STAT1	IRF1	TRI
MPDZ	MPDZ	PPI
CHEK1	CDC25B	PPI
RRM2B	RRM2	PPI
SERPINA5	SERPINA5	PPI
ABCG8	ABCG5	PPI
AURKB	NDC80	PPI
MAPK1	TNFRSF25	PPI
RXRA	PPARA	PPI
RXRA	UBQLN4	PPI
MCM10	CEP70	PPI
CDC25C	CCNA2	PPI
KIF15	MKI67	PPI
SMARCA4	CCNE1	PPI
HMGA1	IRF1	PPI
ANPEP	TM4SF1	PPI
COL4A5	DCN	PPI
HGS	STAM	PPI
MEP1A	MEP1A	PPI
PKM2	SHBG	PPI
GGA1	AP1GBP1	PPI
IRAK2	IRAK2	PPI
PCNA	CCNB1	PPI
PRKDC	TP53	PPI
SEPT8	SEPT8	PPI
CDC2	AR	PPI
YWHAZ	TBXA2R	PPI
FOS	POLA1	TRI
ORC6L	MCM2	PPI
BIN1	BIN1	PPI
NFYA	NFYA	PPI
PPP1R9A	PPP1R9A	PPI
CBX1	DNMT3A	PPI
KNG1	F2	PPI
KNG1	CTSS	PPI
SKAP2	LYN	PPI
GADD45G	RAN	PPI
CCL5	GRB2	PPI
RIPK2	TRAF5	PPI
RPS6KA3	ESR1	PPI
ANTXR2	COL4A2	PPI
MAP4K4	GBP3	PPI
LCK	SHC1	PPI
ESR1	RXRA	PPI
STAT1	SP100	TRI
BIRC3	GSPT1	PPI
CDCA8	BIRC5	PPI
STAT1	IRF1	PPI
F2	AMBP	PPI
TCERG1	BARD1	PPI
FANCI	FANCD2	PPI
PRPF40A	U2AF2	PPI
MMP12	PLAUR	PPI
SIP1	U2AF2	PPI
FANCD2	NBN	PPI
CDC45L	CDKN2A	PPI
GZMA	LMNB1	PPI
SNRPD2	SNRPD1	PPI
SMARCE1	ESR1	PPI
SHBG	SORD	PPI
ATR	NBN	PPI
AR	CDC25B	PPI
CLEC3B	CLEC3B	PPI
REPS2	CDK5RAP2	PPI
SUB1	SUB1	PPI
MAPK1	TCF3	PPI
SYNCRIP	PABPC1	PPI
ARHGEF11	MAP1B	PPI
YWHAB	KIF5B	PPI
KITLG	EPOR	PPI
F12	APOH	PPI
ANXA2	CDC42	PPI
ACAA2	SCP2	PPI
SERPINA5	KLKB1	PPI
BARD1	MDC1	PPI
FOXM1	IGFBP1	TRI
ESR1	TRIM59	PPI
MAGI2	MAGI2	PPI
TP53	TAP1	TRI
BIRC5	CDK4	PPI
TAF6	TAF4	PPI
REPS2	GRB2	PPI
PLK4	PLK4	PPI
FCGR1A	FCGR1A	PPI
UBE2I	CBX4	PPI
PPARBP	AR	PPI
ORC6L	MCM6	PPI
NCOA6	ESR1	PPI
AZGP1	ITGAV	PPI
SMAD5	SNRPA	PPI
TAF1A	TP53	PPI
CCL21	UBQLN4	PPI
KHDRBS1	PLCG1	PPI
F9	F7	PPI
PRKAG2	PRKAB1	PPI
HDAC2	DNMT1	PPI
BAT1	STRN4	PPI
TPM2	JUN	PPI
CSNK1E	CSNK1E	PPI
TES	ENAH	PPI
CANT1	CANT1	PPI
NME1	TERF1	PPI
PLK1	MCM7	PPI
PSME3	KIAA1267	PPI
PCNA	RFC3	PPI
ALDOA	ALDOA	PPI
SERPING1	SELE	PPI
PRKCA	MARCKS	PPI
ESR1	CDC25B	PPI
ALS2CR8	CDKN2A	PPI
ESR1	TUBA1B	PPI
KIF2C	CENPH	PPI
MMP9	TFPI	PPI
GRB2	ESR1	PPI
SOS1	GRB2	PPI
UBE2I	DNMT3A	PPI
ANXA2	CTSB	PPI
MAPKAPK2	HSPB1	PPI
FOXM1	G6PC	TRI
YWHAB	HSPA1B	PPI
PCNA	RFC4	PPI
TNFRSF10A	TNFRSF10D	PPI
MCM3	MCM2	PPI
AKR7A3	AKR7A3	PPI
HSPB1	DAXX	PPI
SMARCA4	SMARCE1	PPI
GGA3	AP1GBP1	PPI
RIPK2	UBE2I	PPI
PHLDA1	HSPA4L	PPI
HMGA1	NFYA	PPI
HSPA1A	NQO1	PPI
MDC1	MDC1	PPI
CENPF	CENPE	PPI
TOLLIP	IL1RAP	PPI
TGFB1	SPARC	PPI
GADD45G	ESR1	PPI
LEF1	U2AF2	TRI
NFYA	KPNB1	PPI
LCN2	MMP9	PPI
PTMA	PCNA	PPI
ATP6AP1	HBA1	PPI
CDC20	TGFBR1	PPI
TRIP13	C8orf32	PPI
TIAM1	HRAS	PPI
PDE2A	PDE2A	PPI
LCP2	VAV3	PPI
SMAD2	NCOA6	PPI
MEP1A	FN1	PPI
NR1I2	CYP3A4	TRI
CFI	CFH	PPI
HRAS	GRB2	PPI
IGF2	IGFBP4	PPI
ID2	ID2	PPI
FZD7	UBQLN4	PPI
F11	KNG1	PPI
YWHAZ	ENO1	PPI
EID2B	EID2B	PPI
ATR	CHEK1	PPI
CBX1	CBX5	PPI
YWHAZ	VIM	PPI
SOCS7	GRB2	PPI
KHDRBS1	GRB2	PPI
SCG5	UBQLN4	PPI
IGF1	IGFBP1	PPI
TP53	MSH2	TRI
NOV	FN1	PPI
PRKCA	SHC1	PPI
CA12	CA12	PPI
ALDH5A1	ABAT	PPI
OSBPL3	YWHAG	PPI
TP53	NCAPD2	TRI
ZFPM2	UBQLN4	PPI
NR3C2	PIAS3	PPI
PZP	CPB2	PPI
CD8A	LCK	PPI
ANXA2	GRB2	PPI
CSNK1D	CDK5	PPI
EED	HDAC2	PPI
BCOR	CPNE2	PPI
CENPJ	YWHAZ	PPI
TP53	CDC25C	TRI
NR1H4	RXRA	PPI
NCOA3	PSME3	PPI
HSPH1	CFL1	PPI
IRAK1	RIPK2	PPI
CDKN2A	CDK4	PPI
CHTF18	RFC4	PPI
SERPING1	MASP1	PPI
CEP55	CDC2	PPI
SERPING1	MASP2	PPI
TP53	METTL8	TRI
PPIA	PPIA	PPI
CHEK1	CUL4A	PPI
TAF1A	TAF1A	PPI
NUP62	PTMA	PPI
MVP	ESR1	PPI
MLLT6	UBQLN4	PPI
ZNF295	YWHAG	PPI
STK3	STK3	PPI
SEPT8	SEPT4	PPI
DBN1	NIPBL	PPI
RALGDS	HRAS	PPI
RRM2B	TP53	PPI
PTMA	CDC2	PPI
ANAPC7	CDC20	PPI
EZH2	SMS	PPI
SPC25	NDC80	PPI
F5	F2	PPI
EIF3S6	GPAA1	PPI
MATN2	COL4A1	PPI
CDC7	ORC6L	PPI
PAG1	LYN	PPI
BCR	BCR	PPI
GCHFR	GCH1	PPI
HSF1	HSF1	PPI
CENPJ	TUBG1	PPI
DACH1	SIX1	PPI
DAB2	GRB2	PPI
ESR1	PIAS3	PPI
PPARA	APOC3	TRI
DDEF2	SH3KBP1	PPI
PAPSS1	PPP1R16A	PPI
CBX1	TRIM28	PPI
ATIC	ATIC	PPI
DNMT1	EZH2	PPI
PAG1	SHC1	PPI
CDC25B	CDC2	PPI
ANPEP	F8	TRI
CDC6	MCM3	PPI
EDD1	MAPK1	PPI
SNAP25	HGS	PPI
FEN1	PCNA	PPI
NDRG1	PKM2	PPI
NME1	C8orf32	PPI
ANG	ATP6AP1	PPI
ADRB2	GRB2	PPI
TRIM24	ESR1	PPI
F2	PROS1	PPI
TP53	GPHN	TRI
NQO1	TP53	PPI
PCNA	CDK5	PPI
TP53	NR1I2	TRI
HGS	PIK3R1	PPI
CA12	MRPL9	PPI
TP53	ENO1	TRI
GPAA1	PIGU	PPI
NR2F1	APOA4	TRI
PCNA	GADD45A	PPI
ZWILCH	KNTC1	PPI
MAP3K5	TPD52L1	PPI
GHR	PIK3R1	PPI
FOS	ALDOA	TRI
DNMT1	EED	PPI
AURKA	TACC3	PPI
ITGA2	COL1A1	PPI
MCM2	MCM2	PPI
TP53	TRIM22	TRI
HSF1	HSP90AB1	TRI
IL18R1	IL1RAP	PPI
SYNJ2	GRB2	PPI
PRKCA	RALBP1	PPI
RIPK2	CASP8	PPI
GPD2	ALDOA	PPI
TRIP13	C11orf54	PPI
SKAP2	TGFBR1	PPI
MCM7	CDC6	PPI
MAP3K7	MAP3K7	PPI
MED28	GRB2	PPI
EPDR1	UBQLN4	PPI
MAP4K4	RAP2A	PPI
HSF2	HSPA1B	TRI
CAD	CAD	PPI
FOXM1	SLC2A2	TRI
THBS1	HRG	PPI
DYRK2	HIST2H2BE	PPI
TIAM1	PRKCA	PPI
CLEC3B	HGF	PPI
KRT19	ABI2	PPI
PRKCD	PEBP1	PPI
RACGAP1	TUBA4A	PPI
ABHD5	ADFP	PPI
PPARBP	CRSP2	PPI
ANAPC7	CDH1	PPI
COIL	KALRN	PPI
GCDH	GCDH	PPI
NR0B2	ESR1	PPI
SPRY2	CBL	PPI
PRKCB1	GJA1	PPI
ATR	MSH2	PPI
NCOA3	AR	PPI
LCAT	APOA1	PPI
SHCBP1	SHC1	PPI
SKAP1	FYN	PPI
CDKN2A	GSPT1	PPI
CDC2	RAP1GAP	PPI
CYB5A	SCD	PPI
HDAC6	TUBA4A	PPI
S100A11	S100A11	PPI
YWHAZ	HSPA1A	PPI
KPNA2	SLC2A2	PPI
SMURF2	RUNX3	PPI
PSMB9	NCOA3	PPI
CFLAR	RIPK2	PPI
RIPK2	CASP1	PPI
KHDRBS1	LYN	PPI
LASP1	TRIP13	PPI
APOA1	APOB	PPI
RXRA	FUS	PPI
CBFA2T2	C8orf32	PPI
DVL3	DAB2	PPI
COIL	TGS1	PPI
FOS	MMP1	TRI
ITGB8	TGFB1	PPI
DBF4	MCM2	PPI
CDC25B	SFN	PPI
SOS1	PLCG1	PPI
SLC4A7	SLC4A4	PPI
HSPD1	ALDH2	PPI
RAN	AR	PPI
PPARA	PCK1	TRI
ANXA2	APOH	PPI
KHDRBS3	KHDRBS3	PPI
BARD1	MSH2	PPI
AR	PIGR	TRI
MCM4	MCM2	PPI
KSR1	YWHAZ	PPI
MAPK9	NFATC3	PPI
TP53	PRKAG2	TRI
TP53	HDAC2	PPI
SYNE1	LMNA	PPI
MCM7	MCM10	PPI
GADD45B	PPARA	PPI
PRKCD	ITGA6	PPI
HGS	PAK1	PPI
PRKCA	PLCB1	PPI
UTP14A	PDCD5	PPI
TIAM1	PRKCD	PPI
NQO1	NQO1	PPI
ANPEP	ADH1A	TRI
FXYD1	ATP1A1	PPI
TP53	SMAD2	PPI
LCP2	GRB2	PPI
TTR	SETDB1	PPI
YWHAG	CKAP2	PPI
KIF4A	TTF2	PPI
PCNA	DNMT1	PPI
SSB	SSB	PPI
HRAS	MAP2K1	PPI
CDC42EP5	CDC42	PPI
BIN1	ITGA6	PPI
YWHAZ	CDC25C	PPI
ABCC9	KCNJ8	PPI
PPARGC1A	NR1H4	PPI
GRB2	CBL	PPI
CLSTN1	CLSTN1	PPI
NCAPH	CAPG	PPI
PAIP2B	PABPC1	PPI
ESR1	NR2F1	PPI
BARD1	BARD1	PPI
UBE2I	AR	PPI
UCK2	UCK2	PPI
BUB1B	AP2B1	PPI
NASP	HIST1H3H	PPI
NFYA	JUN	PPI
ROBO1	TUBB3	PPI
SLC7A11	BAAT	PPI
MED12	MED12	PPI
RIT1	SMAD2	PPI
IL2RB	SOCS3	PPI
ITGA6	GRB2	PPI
TRIM24	TRIM24	PPI
ACY3	ACY3	PPI
PRKCA	LMNA	PPI
